# Supplementary material for: The diversity, evolution, and development of setal morphologies in bumble bees (Hymenoptera: Apidae: Bombus spp.)
Source: PeerJ. 2022 Dec 21;10:e14555. doi: 10.7717/peerj.14555 (PMC9789693; doi:10.7717/peerj.14555)
Supplement: Supplemental Information 1 — Specimens examined for determining the distribution of plumose versus bipectinate setae across the body. Castes examined include workers (W), queens (Q), or females (F). When more than one specimen was sampled per site, this is indicated in the Caste column. [file peerj-10-14555-s001.xlsx]

## Sheet: Copy of Sheet1
Subgenus	Species	Caste	Locality
Alpigenobombus	breviceps	W	China: Sichuan, Chang-Chia-Tsun
	kashmirensis	W	China: Sichuan, Hongyuan
	kashmirensis	W	China: Zhejiang, Tianmushan
	wurflenii	W	Switzerland: St. Gotthard Pass
	wurflenii	W	Turkey: Rize Province, Ayder
Alpinobombus	alpinus	W	Austria: Gurgital, Hohe Mut
	balteatus	W	Sweden: Lappland Co., Kiruna
	balteatus	W	USA: Alaska, Denali
	hyperboreus	Q	Sweden: Dalarna Co.
	neoboreus	Q	USA: Alaska
Bombias	auricomus	W/Q	USA: Illinois, Urbana
	auricomus	W	USA: Pennsylvania, Adams Co.
	confusus	W	Russia: Novosibirsk
Bombus	affinis	W	USA: Pennsylvania, State College
	affinis	W	USA: Pennsylvania, Kettle Creek S.P.
	affinis	W	USA: Pennsylvania, Voneide P.
	franklini	W	USA: California, Hilt
	hypocrita	Q	Japan: Kyushu
	hypocrita	W	South Korea: Gangwon-do, Chuncheon
	lucorum	W	N.E. Kazakhstan
	lucorum	W	France: Pyrenees-Orientales, Llo
	moderatus	Q	Canada: Alberta, Calgary
	patagiatus	Q/W	Mongolia: W. Khentey
	terrestris	W	Italy: San Quirico
	terrestris	W	Sweden: Lappland Co.
	terricola	W	Canada: Quebec, Cabonga Reservoir
	terricola	W	USA: Pennsylvania, State College
	terricola	W	USA: Pennsylvania, Rothrock State Forest
Cullumanobombus	brachycephalus	W	Mexico: Jalisco, San Gabriel
	coccineus	Q	Unknown
	crotchii	W	USA: California, Placer Co.
	fraternus	W	USA: Illinois, Champaign
	funebris	W	Bolivia: La Paz Province
	funebris	W	Peru: Huarochiri, San Mateo
	griseocollis	W	USA: Arkansas, Fayetteville
	handlirschi	W	Peru: Pasco
	hortulanus	W	Colombia: Magdalena
	morrisoni	W	USA: W. Utah
	robustus	Q	Colombia: Boyacá
	rubicundus	W	Colombia: Boyacá
	rubicundus	W	Colombia: Cundinamarca
	rufocinctus	W/Q	Canada: Alberta, Edmonton
	rufocinctus	W	Unknown
	volucelloides	W	Panama: Bocas del Toro Pr.
	volucelloides	W	Panama: Chiriqui Prov.
Kallobombus	soroeensis	W	Finland: Edesbacka
	soroeensis	Q/W	France: Pyrenees-Orientalis, Err
	soroeensis	W	Turkey: Artvin Prov., Yalnizcan Daglari
Megabombus	consobrinus	W	Kazakhstan: SW Altai
	consobrinus	W	S. Korea: Odaesan Dongsan
	diversus	W	Japan: Kyushu
	hortorum	W	Italy: Toscana
	hortorum	W	Sweden: Uppsala
	longipes	W	China: Sichuan, Qionglai Shan
	religiosus	W	China: Sichuan, Qionglai Shan
	ruderatus	W	Germany: Brandenburg
	ruderatus	W	Chile: Valaira Prov.
	ruderatus	W	France: Pyrenees-Orientales, Err de la planes
	supremus	W	China: Sichuan, 60km S. Hongyuan
	supremus	W	China: Sichuan, Qionglai Shan
	sushkini	W	China: Sichuan, 40km N. Hongyuan
	trifasciatus	W	China: Sichuan, Xiaohechang
	trifasciatus	W	Myanmar: Chin State, Mt. Victoria
	trifasciatus	W	China: Zhejiang, Tianmu Shan
	trifasciatus malaisei	W	China: Sichuan, Dacoahe
Melanobombus	eximius	W	Taiwan: Miaoli
	festivus	W	China: Guizhou
	formosellus	W	Taiwan: Taitung County: Hohaun Mt.
	formosellus	W	Taiwan: Taitung County: Hohaun Mt.
	formosellus	W	Taiwan: Taitung County: Yakov
	keriensis	W	China: Sichuan, 40km N. Hongyuan
	keriensis	Q	China: Tibet, N. Saga
	ladakhensis	W	China: Sichuan, Minshan
	ladakhensis	W	China: Sichuan, Hongyuan
	lapidarius	W	France: Pyrenees-Orientales, Dorres
	lapidarius	W	Turkey: Artvin Prov., Yalnizcan Daglari
	rufofasciatus	W (n=2)	China: Tibet, nr. Shegotze
	sichelli	W	Kazakhstan: S. Altai
	sichelli	W	Switzerland: St. Gotthards Pass
	simillimus	W	India: Himachal Pradesh, Jalori Pass
Mendacibombus	avinoviellus	W	Kashmir: Gulmarg
	convexus	W	China: Sichuan, MinShan
	handlirschianus	W (n=2)	Turkey: Artvin Prov., Yalnizcan Daglari
	mendax	W	Austria: Gurgital, Hohemut
	mendax	W	France: Pyrenees-Orientalis, Eyne
	waltoni	W	China: Sichuan, Qionglai Shan
Orientalibombus	funerarius	W	China: Sichuan, Lugishan
	funerarius	Q	Nepal: Ramechap Dist.
	haemorrhoidalis	W	Bhutan
	haemorrhoidalis	W	India: Himachal Pradesh, Palampur
	haemorrhoidalis	W	India: Himachal Pradesh, Kasauli
Psithyrus	ashtoni	F	USA: Pennsylvania, Picture Rocks
	ashtoni	F	USA: Pennsylvania, State College
	campestris	F	Sweden: Dalarna Co., Avesta
	citrinus	F (n=2)	USA: Pennsylvania, State College
	citrinus	F	USA: Pennysylvania, The Rock
	flavidus	F	Canada: British Columbia
	flavidus	F	USA: North Carolina, Swain Co.
	flavidus	F	USA: Pennsylvania, Centre Co.
	insularis	F	USA: California, Westport
	maxillosus	F	Armenia: Aragatsoth Prov.
	rupestris	F	Sweden: Uppsala
	skorikovi	F	China: Sichuan, Shang Aba
	sylvestris	F	France: Pyrenees-Orientales, Eyne
	vestalis	F	Italy: Ancona
	vestalis	F	Italy: Appignano
Pyrobombus	avanus	W	China: Sichuan, Luojishan
	bifarius bifarius	W	USA: Colorado, El Paso Co.
	(bifarius) vancouverensis	W	Canada: Yukon, Whitehorse
	(bifarius) vancouverensis	W	USA: Oregon, Crater Lake
	bimaculatus	W	USA: Pennsylvania, State College
	biroi	Q/W	Kazakistan: Kelmet Mt.
	centralis	W	USA: Colorado, Larimer Co.
	centralis	W	USA: Oregon, Blitzen River
	centralis	W	USA: Nevada, Santa Rosa Mts.
	cingulatus	W (n=2)	Finland: Lauttaselka
	ephippiatus	W	Mexico: Chiapas, Casa de Javier
	ephippiatus	W	Mexico: Chiapas, San Cristobal de las Casas
	flavescens	W	Taiwan: Nanfou, Pai Tung
	flavescens	W	Taiwan: Nanfou, Reyem
	flavifrons	W	USA: California, Mokelumne NF
	flavifrons	W	USA: Utah, Big Utah
	frigidus	W	Canada: Alberta, Ya Ha Tinda Ranch
	frigidus	W	USA: Alaska, Denali County
	hypnorum	W (n=2)	China: Sichuan, Qionglai Shan
	impatiens	W (n=3)	USA: Pennsylvania, State College
	infrequens	W	China: Sichuan, 20km E Maerkang
	infrequens	W	China: Sichuan, 48km. NW Miyalao
	lemniscatus	W (n=2)	China: Sichuan, 60km E Maerkang
	melanopygus	W	USA: California, Yo-Solano Co.
	melanopygus	W	USAL California, Plumas Co.
	melanopygus	W	USA: California, Trinity Co.
	perplexus	W (n=3)	USA: Central Pennsylvania
	picipes	W	China: Guizhou Prov., Mt. Fanjin
	picipes	W	China: Sichuan, Qionglai Shan
	pratorum	W	Finland: Edesbacka
	pratorum	W	France: Pyrenees-Orientalis, Egat
	pratorum	W	Turkey: Rize Prov., Ayder
	pyrenaeus	W (n=2)	France: Pyrenees-Orientales, Eyne
	sandersoni	W (n=3)	USA: Central Pennsylvania
	sylvicola	W	"Color Pattern 057B SAC Collection"
	sylvicola	W	USA: California, Mokelumne NF
	ternarius	W	Nova Scotia: Cape Breton
	ternarius	W	USA: Pennsylvania, Hyner View
	ternarius	Q	USA: Pennsylvania: State College
	ternarius	W	USA: Pennsylvania, Clinton Co.
	vagans	W (n=3)	USA: Central Pennsylvania
	vosnesenkii	W	"Color Pattern 059B - SAC collection"
	vosnesenkii	W	USA: Oregon, Josephine Co.
	vosnesenkii	Q	USA: Oregon, RioRosa Ranch
Sibiricobombus	niveatus	W (n=3)	Turkey: NEE Aksaray
	oberti	W	Tibet: NW Slope Mt. Kailas
	sibiricus	W	Mongolia: Khovsgol Nuur
	sulfureus	W	Turkey: Kaiseri, Gulveren
Subterraneobombus	appositus	W	USA: CO, Teller Co.
	borealis	W	Canada: Ontario, Moosefactory
	borealis	W	USA: Pennsylvania, State College
	fragrans	W	Turkey: Kayseri
	fragrans	W/Q	Turkey: nee Aksaray
	melanurus	W	India: Himachal Pradesh, Gulaba
	melanurus	W/Q	Turkey: Kayseri
	subterraneus	W	France: Pyréneés-Orientales, Llo
	subterraneus	W	Mongolia: W Khentii
Thoracobombus	atratus	W	Argentina: 30 km E of Corrientes
	atratus	W (n=2)	Colombia: Boyacá
	atripes	W	China: Zhejiang, Tianmu Shan
	californicus	W	USA: Oregon
	dahlbomii	Q	Chile: Arauco Prov.
	diligens	W	Mexico: Michoacan
	diligens	W	Mexico: Oaxaca
	excellens	W	Colombia: Cueva de los Guácharos NP
	excellens	Q	Venezuela: Aragua, Henri Pittier NP
	exil	W	Mongolia: E. Hovsgol Nuur
	fervidus	W (n=2)	USA: Pennsylvania, Adams Co.
	fervidus	W	USA: Pennsylvania, Huntigdon Co.
	filchnerae	W	China: Sichuan, 10-50km S. Hongyuan
	filchnerae	W	China: Sichuan, 40km W Hongyuan
	humilis	W (n=2)	France: Pyrenees-Orientales, Llo
	impetuosus	W	China: Sichuan, Xinmian
	laesus	W (n=2)	China: Sichuan, 40km N. Hongyuan
	laesus	W	Turkey: Kars, Oluklu Basti
	medius	W	Guatamala: Huehuetenago
	medius	W	Mexico: Puebla
	medius	W	Mexico: San Luis Potosi
	mesomelas	W	France: Pyrenees-Orientales, Err
	mesomelas	W	Turkey: Artvin Prov., Yalnizcan Daglari
	morio	W/Q (n=2)	Bolivia: La Paz Prov.
	mucidus	W (n=2)	France: Pyrenees-Orientalis, Err, Le Planes
	pascuorum	W (n=2)	Turkey: Rize Prov., Ayder
	pensylvanicus	W	USA: Pennsylvania, Centre Co.
	pensylvanicus	W	USA: Pennsylvania, Lancaster
	pomorum	W	Turkey: Erzingan
	pseudobaicalensis	W	Russia: Primorskiy
	remotus	W	China: Sichuan, MinShan
	remotus	W	China: Sichuan, 25km W. LiXian
	ruderarius	W	France: Pyrenees-Orientales, Eyne
	ruderarius	W	Turkey: Kayseri
	sonorus	worker	USA: Oregon, Steen Mt.
	steindachneri	W	Mexico: Morelas
	steindachneri	W	Unknown
	tricornus	W	Russia: Primorskiy Krai
	trinominatus	W (n=2)	Mexico: Oaxaca
	veteranus	W	Germany: Brandenburg-Schwedt
	weisi	W	Mexico: Jalisco, La Manzanilla
	weisi	W	Mexico: Jalisco, Volcan de Colima
	weisi	W	Mexico: Queretaro, Pinal de Amoles
	zonatus	W (n=2)	Turkey: NEE Aksaray Agzikarahan

## Sheet: Sheet1
Species	Subgenus	Caste	Locality	GPS (Latitude, Longitude)	Date	Collector
ephippiatus	Pyrobombus	W	Mexico: Chiapas, Casa de Javier	16.803097224, -92.27743053	12.ii.2012	M. Duennes
ephippiatus	Pyrobombus	W	Mexico: Chiapas, San Cristobal de las Casas, Huitepec Reserve	16.7497222, -92.6886111	9.v.2011	M. Duennes
waltoni	Mendacibombus	W	China: Sichuan, Qionglai Shan, 60km E Maerkang		2-viii-2002	SAC et al.
handlirschianus	Mendacibombus	W	Turkey: Artvin Prov., Yalnizcan Daglari	41.0640833, 42.2748611	8.viii.2002	H. Hines
handlirschianus (var. shaposhnikovi)	Mendacibombus	W	Turkey: Artvin Prov., Yalnizcan Daglari	41.0640833, 42.2748611	8.viii.2002	H. Hines
mendax	Mendacibombus	W	Austria: Gurgital, Hohemut		16.vii.1999	S. Cameron, J. Whitfield
mendax latofasciatus	Mendacibombus	W	France: Pyrenees-Orientalis, Eyne, Pla de la Beguda		26.vii.2002	H. Hines
convexus	Mendacibombus	W	China: Sichuan, MinShan, 15km W Huanglong NP		9.viii.2002	SAC et al.
avinoviellus	Mendacibombus	W	Kashmir: Gulmarg		vi-vii.1985	P. Williams
soroeensis	Kallobombus	W	Turkey: Artvin Prov., Yalnizcan Daglari	41.0640833, 42.2748611	8.viii.2002	H. Hines
soroeensis	Kallobombus	Q/W	France: Pyrenees-Orientalis, Err, Le Planes		24.vii.2002	H. Hines
soroeensis	Kallobombus	W	Finland: Edesbacka		9-viii-2003
pratorum	Pyrobombus	W	Turkey: Rize Prov., Ayder, Kaskar Dagi, Milliparki	40.918861, 41.145	2002	H. Hines
pratorum	Pyrobombus	W	France: Pyrenees-Orientalis, Egat	42.5076111, 2.019083	23.vii.2002	H. Hines
pratorum	Pyrobombus	W	Finland: Edesbacka		8-viii-2003
ternarius	Pyrobombus	Q	Pennsylvania: State College area		2022	H. Hines
vosnesenkii	Pyrobombus	Q	USA: Oregon, RioRosa Ranch	42.256694, -122.4690277
vosnesenkii	Pyrobombus	W	USA: Oregon, Josephine Co.		2004	T. Griswold
vosnesenkii	Pyrobombus	W	"Color Pattern 059B - SAC collection"
pyrenaeus	Pyrobombus	W	France: Pyrenees-Orientalis, Eyne, Pla de la Beguda		26.vii.2002	H. Hines
pyrenaeus	Pyrobombus	W	France: Pyrenees-Orientales, Eyne, Roque-Blanque	42.4759722, 2.103444	2002	H. Hines
picipes	Pyrobombus	W	China: Sichuan, Qionglai Shan, 60km E Maerkang		3.viii.2002	SAC et al.
picipes	Pyrobombus	W	China: Guizhou Prov., Mt. Fanjin		18-vii-viii-2001	M. Yun
niveatus vorticosus	Sibiricobombus	W	Turkey: NEE Aksaray Agzikarahan	38.454722, 24.1573055	2-viii-2002	H. Hines
niveatus vorticosus	Sibiricobombus	W	Turkey: NEE Aksaray Agzikarahan	38.454722, 24.1573055	2-viii-2002	H. Hines
niveatus niveatus	Sibiricobombus	W	Turkey: NEE Aksaray Agzikarahan	38.454722, 24.1573055	2-viii-2002	H. Hines
sylvicola	Pyrobombus	W	USA: California, Mokelumne NF, Frog Lake		18-viii-1995	J. Whitfield
sylvicola	Pyrobombus	W	"Color Pattern 057B SAC Collection"
laesus		W	Turkey: Kars, Oluklu Basti	40.319, 42.932333	10-viii-2002	H. Hines
laesus		W	China: Sichuan, 40km N. Hongyuan		5-7-viii-2002	SAC et al.
laesus		W	China: Sichuan, 40km N. Hongyuan		5-7-viii-2002	SAC et al.
sulfureus		W	Turkey: Kaiseri, 1kmSE Gulveren	38.558722, 35.8084722	4-viii-2002	H. Hines
remotus		W	China: Sichuan, MinShan, Maoxian Ecol. Field St.		10-viii-2002	SAC et al.
remotus		W	China: Sichuan, Qionglai Shan, 25km W. LiXian		1-viii-2002	SAC et al.
bimaculatus	Pyrobombus	W	USA: Pennsylvania, State College		2015	H. Hines
impatiens	Pyrobombus	W	USA: Pennsylvania, State College		2015-04-28	H. Hines
oberti		W	Tibet: NW Slope Mt. Kailas	30, 82	16.vii.2004	T. Bardell
supremus		W	China: Sichuan, Qionglai Shan, 60km E Maerkang		2.viii.2002	SAC et al.
supremus		W	China: Sichuan, 60km S. Hongyuan		3.viii.2002	SAC et al.
religiosus		W	China: Sichuan, Qionglai Shan, 25km W. LiXian		1-viii-2002	SAC et al.
biroi	Pyrobombus	Q/W	Kazakistan: Kelmet Mt.	43.28, 79.52	3-vi-2004	M. Hauser
cingulatus	Pyrobombus	W	Finland: Lappl., Lauttaselka	68.2922, 21.8875	21.vii.1999	P. Rasmont
cingulatus	Pyrobombus	W	Finland: Lappl., Lauttaselka	68.2922, 21.8875	21.vii.1999	P. Rasmont
flavifrons	Pyrobombus	W	USA: California, Mokelumne NF, Frog Lake		18-viii-1995	J. Whitfield
flavifrons	Pyrobombus	W	USA: Utah, Big Utah		vi.1993	S. Cameron, J. Whitfield
flavescens	Pyrobombus	W	Taiwan: Nanfou, Reyem	??	12.vi.2004	C. Dietrich
flavescens	Pyrobombus	W	Taiwan: Nanfou, Pai Tung, Yan Mt.	??	13-vi-2004	C. Dietrich
infrequens	Pyrobombus	W	China: Sichuan, Qionglai Shan, 20km E Maerkang		3.viii.2002	SAC et al.
infrequens	Pyrobombus	W	China: Sichuan, Qionglai Shan, 48km. NW Miyalao		2.viii.2002	SAC et al.
vagans	Pyrobombus	W (n=3)	USA: Pennsylvania		2020	H. Hines
perplexus	Pyrobombus	W (n=3)	USA: Pennsylvania		2020	H. Hines
sandersoni	Pyrobombus	W (n=3)	USA: Pennsylvania		2020	H. Hines
eximius		W	Taiwan: Miaoli		v-2006	Y. Su
lapidarius	Melanobombus	W	Turkey: Artvin Prov., Yalnizcan Daglari	41.0640833, 42.2748611	8.viii.2002	H. Hines
lapidarius	Melanobombus	W	France:Pyrenees-Orientales, Dorres, Belloc	42.47775, 1.92611	27-vii-2002	H. Hines
sichelli	Melanobombus	W	Switzerland: St. Gotthards Pass		27-vii-1999	S.Cameron, J. Whitfield
trifasciatus malaisei		W	China: Sichuan, Dacoahe
rufofasciatus		W (n=2)	China: Tibet, nr. Shegotze		1-vii-2004
sichelli	Melanobombus	W	Kazakhstan: S. Altai	49.046, 85.0353	3-5.viii. 2004	P. Mardulyn
zonatus		W (n=2)	Turkey: NEE Aksaray Agzikarahan	38.454722, 24.1573055	2-viii-2002	H. Hines
atripes		W	China: Zhejiang, Tianmushan		25-30.vii.2001	Meihua
tricornus		W	Russia: Primorskiy Krai, Belozoviy Stream, Sukhodol R.	43.1715, 132.76817	31-viii.2002	K. Holston
weisi		W	Mexico: Jalisco, La Manzanilla	19.90562, -103.05741	16.xi.2007	Ayala
weisi		W	Mexico: Queretaro, Pinal de Amoles	21.15041, -99.61172	11.xi.2007	Ayala
weisi		W	Mexico: Jalisco, Volcan de Colima	19.61430, -103.56705	16.xi.2007	Ayala
impetuosus		W	China: Sichuan Xinmian	29.09366, 102.33627	26.viii.2005	Williams
exil		W	Mongolia: E. Hovsgol Nuur		vi-2004
veteranus		W	Germany: Brandenburg-Schwedt		2004-07-05
mucidus		W (n=2)	France: Pyrenees-Orientalis, Err, Le Planes	42.39575, 2.076972	24.vii.2002	H. Hines
diversus			Japan: Kyushu		iv-2002	S. Huang
longipes		W	China: Sichuan, Qionglai Shan		1.viii.2002	Li Xua
haemorrhoidalis			India: Kasauli		14.ix.1995
haemorrhoidalis		W	India: British Bhutan Palang Puree		1913
festivus		W	China: Guizhou, Mt. Fanjing?		18-vii-vii-2001
funebris		W	Peru: Huarochiri, San Mateo	-11.7654, -76.3036	17-20.i.03	C. Rasmussa
funebris		W	Bolivia: La Paz Province, Huatajata Titicaca	-16.20027, -68.72361
handlirschi		W	Peru: Pasco	-10.54444, -75.36666	11.x.2001	D. Takiya
Brachycephalibombus		W
frasfera		W	USA: Illinois, Champaign, Meadow Brook Park		30.xiii.2003	H. Hines
rufocinctus		W
rufocinctus		W/Q	Canada: Alberta, Edmonton		27.viii.1987	A. Scholl
wurflenii		W	Switzerland: St. Gotthard Pass		22.vii.1999
kashmirensis		W	China: Sichuan, Tibetan Plateau, Hongyuan		4.viii.2002	Cameron et. al
brachycephalu		W	Mexico: Jalisco, San Gabriel, Bosque Pino Encino	19.85083, -103.69119	20.x.1996	F. Noguera
coccineus		Q	Peru?			C. Rasmussen
kashmirensis		W	China: Zhejiang, Tianmushan		27-28.vii.2002
wurflenii		W	Turkey: Rize Province, Ayder Kaskar	40.91886, 41.14500	6.viii.2002	H. Hines
balteatus		W	USA: Alaska, Denali	63.75, -149.66		Cameron, Whitfield
balteatus		W	Sweden: Lappland Co. Kiruna		26-27.vii.1999	B. Cederberg
hyperboreus		Q	Sweden: Dalarna Co.		13.vi.1999	B. Cederberg
neoboreus		Q	USA: Alaska		1993	A. Scholl
franklini		W	USA: California, Hilt		29.vii.1999	A. Scholl
aplinus		W	Austria: Gurgital, Hohe Mut		26.vii.1999	Cameron, Whitfield
lucorum		W	N.E. Kazakhstan	49.4575, 82.74528	30.viii.2004	P. Mardulyn
hypocrita		Q	Japan: Kyushu		iv.2002	S. Huang
hypocrita		W	South Korea: Kangwondo, Chuncheon		6-31.vii.2003	P. Tripotin
patagiatus		Q/W	Mongolia: W. Khentey	49.08667, 107.29889	9.ix.2005	M. Mühlenberg
moderatus		Q	Canada: Alberta, Calgary, Kananaskis River Valley, Barrier Lake	51.03333, -115.03333	10.ix.2002
terrestris		W	Italy: San Quírico, Ripa d'Orcia		23.vii.1999	Cameron, Whitfield
terrestris		W	Sweden: Lappland Co. Uppsala-Näs		1.viii.1999	B. Cederberg
excellens		Q	Venezuela: Aragua, Henri Pittier National Park		20.ix.1997	Garcia
excellens		W	Colombia: Cueva de los Guácharos National Natural Park	1.61667, -76.1000	17-18.iii.2012	Cortes
atratus		W (n=2)	Colombia: Boyacá Tunja		14.vi.2003	S. Ranira
atratus		W	Argentina: 30 km E of Corrientes Marantazeal		30.i.1992	C. Rasmussen
dahlbomii		Q
melanurus		W	India: Himachal Pradesh, Gulaba		10.ix.2004	P. Williams
melanurus		W/Q	Turkey: Kayseri Artekir Baraj	38.47678, 35.50167	3.vii.2002	H. Hines
subterraneus		W	Mongolia: W Khentii	49.08806, 107.29333	9.viii.2005	M. Muehlenburg
fragrans		W/Q	Turkey: nee Aksaray, Agzikarahan	38.45472, 24.15731	2.viii.2002	H. Hines
fragrans		W	Turkey: Kayseri İncili-Yamachi	38.53661, 35.74167	4.viii.2002	H. Hines
subterraneus latreille		W	France: Pyréneés-Orientales, la Serre de Llo	42.46533, 2.06189	23.vii.2002	H. Hines
trifasciatus			China: Zhejiang, Tianmushan		27-28.viii.2002
breviceps			China: Sichuan, Chang-Chia-Tsun	26.57582, 102.36730	2005	P. Williams
trifasciatus			USA: Colorado, El Paso County	39.011299331, -105.003969278	6.vi.2017	D. Rhoda
flavidus			Canada: British Columbia, Kalsaitlau		3.vii.2016	Martinet, Rasmont
insularis		F	USA: California, Mendocino County, Westport		21.v.2003	H. Hines
rufipes		W	Central Iara Lake Verne Deing		22.v.1973	C. Michener
vancouverensis			Canada: Yukon, Whitehorse, Takhini	60.85047, -135.69475	29.vii.2016	Martinet, Rasmont
griseocollis			USA: Arkansas, Washington County, Fayetteville, Mount Sequoyah		16-23.iii.1995
morrisoni		W	USA: W. Utah		2002	Griswold
rubicundus		W	Colombia: Boyacá, Iguaque		13.vi.2000	Cameron, Ramirez
rubicundus		W	Colombia: Cundinamarca, El Parque Nacional Natural Chingaza, Valle del Frailejón	4.51667, -73.75	2-17.vii.2000	Perez
avanus		W	China: Sichuan, Luojishan	27.58107, 102.40284	12.viii.2005	P. Williams
frigidus		W	Canada: Alberta, Ya Ha Tinda Ranch		28.v.1989	A. Scholl
frigidus		W	USA: Alaska, Denali County, Denali National Park	63.57, -149.66	16.vi.2005	SAL, JBW
trifasciatus			China: Sichuan, Xi Hechang	29.81838, 102.75536		P. Williams
californicus		W			22.vii.2012	BPE
hypnorum		W (n=2)	China: Sichuan, Qionglai Shan		2.viii.2002	S. Cameron
lemniscatus		W	China: Sichuan, Gion-Glai		2.viii.2002	S. Cameron
lemniscatus		W	China: Sichuan, Samease		2.viii.2002	S. Cameron
simillimus		W	Jalaya Pas		11.ix.2004	HP
ladakhensis		W	China: Sichuan, Minshan, 1km W of Huanglong National Park		9.viii.2002
ladakhensis		W	China: Sichuan, Tibetan Plateau, Hongyuan		4.viii.2002
keriensis		Q	China: Tibet, N of Saga		13.vii.2004	T. Bardell
keriensis		W	China: Sichuan, 40 km N Hongyuan		5-7.viii.2002
ruderarius		W	Turkey: Kayseri		3.viii.2002	H. Hines
