# Supplementary material for: The diversity, evolution, and development of setal morphologies in bumble bees (Hymenoptera: Apidae: Bombus spp.)
Source: PeerJ. 2022 Dec 21;10:e14555. doi: 10.7717/peerj.14555 (PMC9789693; doi:10.7717/peerj.14555)
Supplement: Supplemental Information 2 — Scores for amount of plumose setae by head, thorax, abdominal tergite (T1–T5) and an average across these scores for each species examined. These data were used in analyzing phylogenetic signal across these variables. 0 = none, 1 = margin only, 2 = <25%, 3 = 25=50%, 4 = >50% plumose setae. In between numbers average values across specimens. [file peerj-10-14555-s002.xlsx]

## Sheet: Sheet1
Subgenus	Species	Head	Thorax	T1	T2	T3	T4	T5	Average
Pyrobombus	cingulatus	4	4	4	4	4	4	4	4
Pyrobombus	frigidus	4	4	4	2	3	3	4	3.42857
Pyrobombus	sandersoni	4	4	3	2	1	1	1	2.28571
Pyrobombus	pratorum	4	4	4	3.5	3.5	3.5	4	3.78571
Pyrobombus	pyrenaeus	4	4	4	3	1	1	4	3
Pyrobombus	flavescens	4	4	4	2.5	3.5	3.5	4	3.64286
Pyrobombus	biroi	4	4	3	1	2	1	1	2.28571
Pyrobombus	picipes	4	4	4	4	4	4	4	4
Pyrobombus	infrequens	4	4	4	4	4	4	4	4
Pyrobombus	avanus	4	4	4	4	4	4	4	4
Pyrobombus	lemniscatus	4	4	4	1	1.5	1.5	2	2.57143
Pyrobombus	hypnorum	4	4	4	4	3	3	3	3.57143
Pyrobombus	perplexus	4	4	3	3.5	3.5	2	3	3.28571
Pyrobombus	bifarius	4	4	4	0	0	0.5	1	1.92857
Pyrobombus	ternarius	4	4	4	0	0	0	0	1.71429
Pyrobombus	vosnesenskii	4	4	4	0	0	0	0	1.71429
Pyrobombus	ephippiatus	4	4	4	0	0	1	1	2
Pyrobombus	impatiens	4	4	4	0.5	0.5	0.5	1	2.07143
Pyrobombus	bimaculatus	4	4	4	1	1	1	1	2.28571
Pyrobombus	sylvicola	4	4	2.5	0	0	0	1.5	1.71429
Pyrobombus	melanopygus	4	4	3	1	1	1	1	2.14286
Pyrobombus	centralis	4	4	3	1	1	1	1	2.14286
Pyrobombus	flavifrons	4	4	3.5	1	1	1	3	2.5
Pyrobombus	vagans	4	4	3	1	1	1	1.5	2.21429
Bombus s.s.	patagiatus	4	4	4	2	3	3	4	3.42857
Bombus s.s.	moderatus	4	4	4	2	3	4	4	3.57143
Bombus s.s.	terricola	4	4	4	1	1	1	3	2.57143
Bombus s.s.	franklini	4	4	4	1	1	1	4	2.71429
Bombus s.s.	lucorum	4	4	4	2	2	3	4	3.28571
Bombus s.s.	affinis	4	4	3	1	1	2	2	2.42857
Bombus s.s.	hypocrita	4	4	4	2	1	3	4	3.14286
Bombus s.s.	terrestris	4	4	2	0.5	1	1.5	3.5	2.35714
Alpinobombus	hyperboreus	4	4	4	4	4	4	3	3.85714
Alpinobombus	neoboreus	4	4	4	4	3	4	3	3.71429
Alpinobombus	balteatus	4	4	4	4	4	3.5	4	3.92857
Alpinobombus	alpinus	4	4	4	4	4	3	3	3.71429
Cullumanobombus	robustus	4	4	1	1	1	1	1	1.85714
Cullumanobombus	hortulanus	4	4	1	1	1	1	1	1.85714
Cullumanobombus	volucelloides	4	4	2	0	0	0	0	1.42857
Cullumanobombus	fraternus	4	4	0	0	0	0	0	1.14286
Cullumanobombus	griseocollis	4	4	4	1	1	1	1	2.28571
Cullumanobombus	crotchii	4	4	1	0	0	1	1	1.57143
Cullumanobombus	funebris	4	4	1	0	1	1	1	1.71429
Cullumanobombus	morrisoni	4	4	3	0	1	1	1	2
Cullumanobombus	handlirshi	4	4	4	1	1	1	1	2.28571
Cullumanobombus	rubicundus	4	4	4	1	1	1	1	2.28571
Cullumanobombus	brachycephalus	4	4	0	0	0	1	2	1.57143
Cullumanobombus	rufocinctus	4	4	1	1	1	1	2	2
Sibiricobombus	niveatus	4	4	3	1	1	2	4	2.71429
Sibiricobombus	sulfureus	4	4	3	3	3	3	4	3.42857
Sibiricobombus	sibiricus	4	4	2	1	1	2	3	2.42857
Sibiricobombus	oberti	4	4	1	0	0	1	1	1.57143
Alpigenobombus	wurflenii	4	4	2	1	2	3	4	2.85714
Alpigenobombus	kashmirensis	4	4	1	1	1	2	2.5	2.21429
Alpigenobombus	breviceps	4	4	4	4	4	4	4	4
Melanobombus	sichelli	4	4	0	0	0	1	1	1.42857
Melanobombus	lapidarius	4	4	0	0	0	0	1	1.28571
Melanobombus	keriensis	4	4	0	1	1	1	1	1.71429
Melanobombus	ladakhensis	4	4	0	0	0	0	0	1.14286
Melanobombus	rufofasciatus	4	4	0	0	0	0	0	1.14286
Melanobombus	formosellus	4	4	0	0	0	0	0	1.14286
Melanobombus	simillimus	4	4	0	0	0	1	1	1.42857
Melanobombus	festivus	4	4	4	2	2	2	4	3.14286
Melanobombus	eximius	4	4	4	2	3	3	4	3.42857
Thoracobombus	zonatus	4	4	3	3	4	4	4	3.71429
Thoracobombus	ruderarius	4	4	1.5	1	1.5	2	4	2.57143
Thoracobombus	veteranus	4	4	3	2	4	4	4	3.57143
Thoracobombus	humilis	4	4	1.5	1.5	4	4	4	3.28571
Thoracobombus	pascuorum	4	4	3	1	4	4	4	3.42857
Thoracobombus	pseudobaicalensis	4	4	4	3	4	4	4	3.85714
Thoracobombus	remotus	4	4	3	3	4	4	4	3.71429
Thoracobombus	impetuosus	4	4	1	2	3	3	4	3
Thoracobombus	filchnerae	4	4	0.5	1	2	3	3.5	2.57143
Thoracobombus	laesus	4	4	1	2	2.5	3.5	4	3
Thoracobombus	mucidus	4	4	1	1	1	2	2	2.14286
Thoracobombus	pomorum	4	4	2	1	2	2	4	2.71429
Thoracobombus	mesomelas	4	4	0	1	1	1	2	1.85714
Thoracobombus	morio	4	4	2	1	1	1	4	2.42857
Thoracobombus	excellens	4	4	1	1	2	3	3.5	2.64286
Thoracobombus	dahlbombii	4	4	0	0	0	0	0	1.14286
Thoracobombus	atratus	4	4	1	1	1	1	1	1.85714
Thoracobombus	sonorus	4	4	2	0	1	1	1	1.85714
Thoracobombus	pensylvanicus	4	4	1	1	1	1	1	1.85714
Thoracobombus	medius	4	4	0.5	0.5	1.5	1	1	1.78571
Thoracobombus	steindachneri	4	4	1	1	1	1	1	1.85714
Thoracobombus	diligens	4	4	1	1	1	2	3.5	2.35714
Thoracobombus	californicus	4	4	1	1	1	4	3	2.57143
Thoracobombus	fervidus	4	4	2	1	4	4	2	3
Thoracobombus	trinominatus	4	4	0.5	1	4	4	2	2.78571
Thoracobombus	weisi	4	4	3	2.5	3.5	4	4	3.57143
Thoracobombus	exil	4	4	0	1	4	4	4	3
Thoracobombus	tricornis	4	4	4	4	4	4	4	4
Thoracobombus	atripes	4	4	4	2	3	4	4	3.57143
Psithyrus	skorikovi	4	4	3	1	1	0	0	1.85714
Psithyrus	flavidus	4	4	0.5	0	0	0	0	1.21429
Psithyrus	sylvestris	4	4	3	2	3	2	4	3.14286
Psithyrus	maxillosus	4	4	4	0	3	3	4	3.14286
Psithyrus	vestalis	4	4	1	0	0	0	0	1.28571
Psithyrus	ashtoni	4	4	3	0	0	0	0	1.57143
Psithyrus	rupestris	4	4	2	0	0	0	1	1.57143
Psithyrus	campestris	4	4	1	0	0	0	0	1.28571
Psithyrus	citrinus	4	4	0	0	0	0	0	1.14286
Psithyrus	insularis	4	4	0	0	0	0	0	1.14286
Megabombus	consobrinus	4	4	4	3.5	4	4	4	3.92857
Megabombus	sushkini	4	4	4	3	4	4	4	3.85714
Megabombus	religiosus	4	4	4	4	4	4	4	4
Megabombus	hortorum	4	4	4	3.5	4	4	4	3.92857
Megabombus	ruderatus	4	4	3	3	3	4	4	3.57143
Megabombus	supremus	4	4	3	1.5	1	2	3.5	2.71429
Megabombus	trifasciatus	4	4	4	4	3	4	4	3.85714
Megabombus	longipes	4	4	4	4	4	4	4	4
Megabombus	diversus	4	4	4	4	4	4	4	4
Subterraneobombus	subterraneus	4	4	2.5	0	3	4	4	3.07143
Subterraneobombus	appositus	4	4	1	1	2	4	4	2.85714
Subterraneobombus	borealis	4	4	1	1	3.5	4	4	3.07143
Subterraneobombus	fragrans	4	4	3.5	3.5	4	4	4	3.85714
Subterraneobombus	melanurus	4	4	3.5	3	3.5	3.5	4	3.64286
Orientalibombus	haemorrhoidalis	4	4	4	4	2	1.5	2	3.07143
Orientalibombus	funerarius	4	4	3	2	1	0	1	2.14286
Kallobombus	soroeensis	4	4	0.5	0.5	1	1	1	1.71429
Bombias	confusus	4	4	0	0	0	2	3	1.85714
Bombias	auricomus	4	4	0.5	0.5	1	1	2	1.85714
Mendacibombus	avinoviellus	4	4	0	0	0	0	0	1.14286
Mendacibombus	mendax	4	4	0	0	0	0	0	1.14286
Mendacibombus	handlirschianus	3	3	0	0	0	0	1	1
Mendacibombus	convexus	4	4	0	0	0	0	0	1.14286
Mendacibombus	waltoni	4	4	0	0	0	0	1	1.28571
Average		3.99213	3.99213	2.35039	1.44882	1.78346	2	2.3937	2.5658
Variance		0.00787402	0.00787402	2.40204	1.8803	2.24441	2.31349	2.42313
STDEV		0.0887357	0.0887357	1.54985	1.37124	1.49813	1.52102	1.55664

## Sheet: Copy of Sheet1
Subgenus	Species	Name on phylogeny	Head	Thorax	T1	T2	T3	T4	T5	Average
Pyrobombus	cingulatus	cingulatu	4	4	4	4	4	4	4	4
Pyrobombus	frigidus	frigidus	4	4	4	2	3	3	4	3.42857
Pyrobombus	sandersoni	sanderson	4	4	3	2	1	1	1	2.28571
Pyrobombus	pratorum	pratorum	4	4	4	3.5	3.5	3.5	4	3.78571
Pyrobombus	pyrenaeus	pyrenaeus	4	4	4	3	1	1	4	3
Pyrobombus	flavescens	flavescen	4	4	4	2.5	3.5	3.5	4	3.64286
Pyrobombus	biroi	biroi	4	4	3	1	2	1	1	2.28571
Pyrobombus	picipes	picipes	4	4	4	4	4	4	4	4
Pyrobombus	infrequens	infrequen	4	4	4	4	4	4	4	4
Pyrobombus	avanus	avanus	4	4	4	4	4	4	4	4
Pyrobombus	lemniscatus	lemniscat	4	4	4	1	1.5	1.5	2	2.57143
Pyrobombus	hypnorum	hypnorum	4	4	4	4	3	3	3	3.57143
Pyrobombus	perplexus	perplexus	4	4	3	3.5	3.5	2	3	3.28571
Pyrobombus	bifarius	bifarius	4	4	4	0	0	0.5	1	1.92857
Pyrobombus	ternarius	ternarius	4	4	4	0	0	0	0	1.71429
Pyrobombus	vosnesenskii	vosnesens	4	4	4	0	0	0	0	1.71429
Pyrobombus	ephippiatus	ephippiat	4	4	4	0	0	1	1	2
Pyrobombus	impatiens	impatiens	4	4	4	0.5	0.5	0.5	1	2.07143
Pyrobombus	bimaculatus	bimaculat	4	4	4	1	1	1	1	2.28571
Pyrobombus	sylvicola	sylvicola	4	4	2.5	0	0	0	1.5	1.71429
Pyrobombus	melanopygus	melanopyg	4	4	3	1	1	1	1	2.14286
Pyrobombus	centralis	centralis	4	4	3	1	1	1	1	2.14286
Pyrobombus	flavifrons	flavifron	4	4	3.5	1	1	1	3	2.5
Pyrobombus	vagans	vagans	4	4	3	1	1	1	1.5	2.21429
Bombus s.s.	patagiatus	patagiatu	4	4	4	2	3	3	4	3.42857
Bombus s.s.	moderatus	moderatus	4	4	4	2	3	4	4	3.57143
Bombus s.s.	terricola	terricola	4	4	4	1	1	1	3	2.57143
Bombus s.s.	franklini	franklini	4	4	4	1	1	1	4	2.71429
Bombus s.s.	lucorum	lucorum	4	4	4	2	2	3	4	3.28571
Bombus s.s.	affinis	affinis	4	4	3	1	1	2	2	2.42857
Bombus s.s.	hypocrita	hypocrita	4	4	4	2	1	3	4	3.14286
Bombus s.s.	terrestris	terrestri	4	4	2	0.5	1	1.5	3.5	2.35714
Alpinobombus	hyperboreus	hyperbor	4	4	4	4	4	4	3	3.85714
Alpinobombus	neoboreus	neoboreus	4	4	4	4	3	4	3	3.71429
Alpinobombus	balteatus	balteatus	4	4	4	4	4	3.5	4	3.92857
Alpinobombus	alpinus	alpinus	4	4	4	4	4	3	3	3.71429
Cullumanobombus	robustus	robustus	4	4	1	1	1	1	1	1.85714
Cullumanobombus	hortulanus	hortulanu	4	4	1	1	1	1	1	1.85714
Cullumanobombus	volucelloides	volucello	4	4	2	0	0	0	0	1.42857
Cullumanobombus	fraternus	fraternus	4	4	0	0	0	0	0	1.14286
Cullumanobombus	griseocollis	griseocol	4	4	4	1	1	1	1	2.28571
Cullumanobombus	crotchii	crotchii	4	4	1	0	0	1	1	1.57143
Cullumanobombus	funebris	funebris	4	4	1	0	1	1	1	1.71429
Cullumanobombus	morrisoni	morrisoni	4	4	3	0	1	1	1	2
Cullumanobombus	handlirshi	handlirsi	4	4	4	1	1	1	1	2.28571
Cullumanobombus	rubicundus	rubicundu	4	4	4	1	1	1	1	2.28571
Cullumanobombus	brachycephalus	brachycep	4	4	0	0	0	1	2	1.57143
Cullumanobombus	rufocinctus	rufocinct	4	4	1	1	1	1	2	2
Sibiricobombus	niveatus	niveatus	4	4	3	1	1	2	4	2.71429
Sibiricobombus	sulfureus	sulfureus	4	4	3	3	3	3	4	3.42857
Sibiricobombus	sibiricus	sibiricus	4	4	2	1	1	2	3	2.42857
Sibiricobombus	oberti	oberti	4	4	1	0	0	1	1	1.57143
Alpigenobombus	wurflenii	wurflenii	4	4	2	1	2	3	4	2.85714
Alpigenobombus	kashmirensis	kashmiren	4	4	1	1	1	2	2.5	2.21429
Alpigenobombus	breviceps	breviceps	4	4	4	4	4	4	4	4
Melanobombus	sichelli	sichelli	4	4	0	0	0	1	1	1.42857
Melanobombus	lapidarius	lapidariu	4	4	0	0	0	0	1	1.28571
Melanobombus	keriensis	keriensis	4	4	0	1	1	1	1	1.71429
Melanobombus	ladakhensis	ladakhens	4	4	0	0	0	0	0	1.14286
Melanobombus	rufofasciatus	rufofasci	4	4	0	0	0	0	0	1.14286
Melanobombus	formosellus	formosell	4	4	0	0	0	0	0	1.14286
Melanobombus	simillimus	simillimu	4	4	0	0	0	1	1	1.42857
Melanobombus	festivus	festivus	4	4	4	2	2	2	4	3.14286
Melanobombus	eximius	eximius	4	4	4	2	3	3	4	3.42857
Thoracobombus	zonatus	zonatus	4	4	3	3	4	4	4	3.71429
Thoracobombus	ruderarius	ruderariu	4	4	1.5	1	1.5	2	4	2.57143
Thoracobombus	veteranus	veteranus	4	4	3	2	4	4	4	3.57143
Thoracobombus	humilis	humilis	4	4	1.5	1.5	4	4	4	3.28571
Thoracobombus	pascuorum	pascuorum	4	4	3	1	4	4	4	3.42857
Thoracobombus	pseudobaicalensis	pseudobai	4	4	4	3	4	4	4	3.85714
Thoracobombus	remotus	remotus	4	4	3	3	4	4	4	3.71429
Thoracobombus	impetuosus	impetuosu	4	4	1	2	3	3	4	3
Thoracobombus	filchnerae	filchnera	4	4	0.5	1	2	3	3.5	2.57143
Thoracobombus	laesus	laesus	4	4	1	2	2.5	3.5	4	3
Thoracobombus	mucidus	mucidus	4	4	1	1	1	2	2	2.14286
Thoracobombus	pomorum	pomorum	4	4	2	1	2	2	4	2.71429
Thoracobombus	mesomelas	mesomelas	4	4	0	1	1	1	2	1.85714
Thoracobombus	morio	morio	4	4	2	1	1	1	4	2.42857
Thoracobombus	excellens	excellens	4	4	1	1	2	3	3.5	2.64286
Thoracobombus	dahlbombii	dahlbombii	4	4	0	0	0	0	0	1.14286
Thoracobombus	atratus	atratus	4	4	1	1	1	1	1	1.85714
Thoracobombus	sonorus	sonorSAC	4	4	2	0	1	1	1	1.85714
Thoracobombus	pensylvanicus	pensylv1	4	4	1	1	1	1	1	1.85714
Thoracobombus	medius	medius	4	4	0.5	0.5	1.5	1	1	1.78571
Thoracobombus	steindachneri	steindach	4	4	1	1	1	1	1	1.85714
Thoracobombus	diligens	diligens	4	4	1	1	1	2	3.5	2.35714
Thoracobombus	californicus	californi	4	4	1	1	1	4	3	2.57143
Thoracobombus	fervidus	fervidus	4	4	2	1	4	4	2	3
Thoracobombus	trinominatus	trinomina	4	4	0.5	1	4	4	2	2.78571
Thoracobombus	weisi	weisi	4	4	3	2.5	3.5	4	4	3.57143
Thoracobombus	exil	exil	4	4	0	1	4	4	4	3
Thoracobombus	tricornis	tricornis	4	4	4	4	4	4	4	4
Thoracobombus	atripes	atripes	4	4	4	2	3	4	4	3.57143
Psithyrus	skorikovi	skorikovi	4	4	3	1	1	0	0	1.85714
Psithyrus	flavidus	flavidus	4	4	0.5	0	0	0	0	1.21429
Psithyrus	sylvestris	sylvestri	4	4	3	2	3	2	4	3.14286
Psithyrus	maxillosus	maxillosu	4	4	4	0	3	3	4	3.14286
Psithyrus	vestalis	vestalis	4	4	1	0	0	0	0	1.28571
Psithyrus	ashtoni	ashtoni	4	4	3	0	0	0	0	1.57143
Psithyrus	rupestris	rupestris	4	4	2	0	0	0	1	1.57143
Psithyrus	campestris	campestri	4	4	1	0	0	0	0	1.28571
Psithyrus	citrinus	citrinus	4	4	0	0	0	0	0	1.14286
Psithyrus	insularis	insularis	4	4	0	0	0	0	0	1.14286
Megabombus	consobrinus	consobrin	4	4	4	3.5	4	4	4	3.92857
Megabombus	sushkini	sushkini	4	4	4	3	4	4	4	3.85714
Megabombus	religiosus	religiosu	4	4	4	4	4	4	4	4
Megabombus	hortorum	hortorum	4	4	4	3.5	4	4	4	3.92857
Megabombus	ruderatus	ruderatus	4	4	3	3	3	4	4	3.57143
Megabombus	supremus	supremus	4	4	3	1.5	1	2	3.5	2.71429
Megabombus	trifasciatus	trifascia	4	4	4	4	3	4	4	3.85714
Megabombus	longipes	longipes	4	4	4	4	4	4	4	4
Megabombus	diversus	diversus	4	4	4	4	4	4	4	4
Subterraneobombus	subterraneus	subterran	4	4	2.5	0	3	4	4	3.07143
Subterraneobombus	appositus	appositus	4	4	1	1	2	4	4	2.85714
Subterraneobombus	borealis	borealis	4	4	1	1	3.5	4	4	3.07143
Subterraneobombus	fragrans	fragrans	4	4	3.5	3.5	4	4	4	3.85714
Subterraneobombus	melanurus	melanurus	4	4	3.5	3	3.5	3.5	4	3.64286
Orientalibombus	haemorrhoidalis	haemorrho	4	4	4	4	2	1.5	2	3.07143
Orientalibombus	funerarius	funerariu	4	4	3	2	1	0	1	2.14286
Kallobombus	soroeensis	soroeensi	4	4	0.5	0.5	1	1	1	1.71429
Bombias	confusus	confusus	4	4	0	0	0	2	3	1.85714
Bombias	auricomus	auricomus	4	4	0.5	0.5	1	1	2	1.85714
Mendacibombus	avinoviellus	avinoviel	4	4	0	0	0	0	0	1.14286
Mendacibombus	mendax	mendax	4	4	0	0	0	0	0	1.14286
Mendacibombus	handlirschianus	handlirsc	3	3	0	0	0	0	1	1
Mendacibombus	convexus	convexus	4	4	0	0	0	0	0	1.14286
Mendacibombus	waltoni	waltoni	4	4	0	0	0	0	1	1.28571
Average			3.99213	3.99213	2.35039	1.44882	1.78346	2	2.3937	2.5658
Variance			0.00787402	0.00787402	2.40204	1.8803	2.24441	2.31349	2.42313
STDEV			0.0887357	0.0887357	1.54985	1.37124	1.49813	1.52102	1.55664
