# Supplementary material for: The diversity, evolution, and development of setal morphologies in bumble bees (Hymenoptera: Apidae: Bombus spp.)
Source: PeerJ. 2022 Dec 21;10:e14555. doi: 10.7717/peerj.14555 (PMC9789693; doi:10.7717/peerj.14555)
Supplement: Supplemental Information 3 — Data used for analyzing percent darkness and yellow pigment absorbance amounts. Includes raw data for each replicate, body size corrections for yellow coloration, and calculations for obtaining means and standard deviations. [file peerj-10-14555-s003.xlsx]

## Sheet: Final Data
Time Point-HAE (Hours after eclosion)	Avg. Absorbance	STDEV
0	0.005	0.01
12	0.0039	0.00502
16	0.1136	0.05644
20	0.2131	0.10178
24	0.315	0.12715
28	0.4375	0.08884
32	0.8106	0.32989
48	0.745	0.49997
72	0.6885	0.11185
Time points -HAE(hours after eclosion)	relative darkness (percentage pigmentation)	SE
0h	0.566231	0.0252823
4h	0.632973	0.0604083
8h	0.686013	0.0111516
12h	0.741901	0.05009
16h	0.782837	0.0396939
20h	0.866142	0.0656852
24h	0.912642	0.068724

## Sheet: %Darkness_calculation method
measurement of hair pigmentation process
sampling
For each time points, 3 individual pupa was used
for each indivudal, grey value for 4-5 single hairs was imaged
for each single hairs, 12 measurements on different locations (or area) along the hair was performed in Image J to measure grey value
calculation
mean single hair grey value=average value of the 12 measurements
mean invidual grey value=average of mean single hair grey value from 4-5 hairs
darkness of individual =255-mean indiviudal grey value
to calculate percentage of darkness
1	calculate mean darkness of adult hair= average of darkness of individual of three adult bee
2	percentage darkness of individual pupa or callow=(darkness of individual of pupa or callow/ mean darkness of adult hair) X 100 %
3	mean average percentage of darkness of each time point=avage value of percentage darkness of individual pupa or callow from 3 pupal or callow bee
4	final value on the figure=mean average percentage of darkness of each time point±SE

## Sheet: %Darkness_raw measurement data 
	Label	Area	Mean	Min	Max		mean single hair grey value
0h-1-1
1	2017-12-04-19.04.35 ZS PMax-0h-1-black-2.jpg:0001-1758	26	47.308	35	75
2	2017-12-04-19.04.35 ZS PMax-0h-1-black-2.jpg:0002-1728	26	116.846	75	136
3	2017-12-04-19.04.35 ZS PMax-0h-1-black-2.jpg:0003-1648	32	129.406	95	149
4	2017-12-04-19.04.35 ZS PMax-0h-1-black-2.jpg:0004-1627	34	101.853	70	120
5	2017-12-04-19.04.35 ZS PMax-0h-1-black-2.jpg:0005-1144	216	157.588	108	182
6	2017-12-04-19.04.35 ZS PMax-0h-1-black-2.jpg:0006-1016	177	143.226	99	190
7	2017-12-04-19.04.35 ZS PMax-0h-1-black-2.jpg:0007-0930	208	170.173	130	192
8	2017-12-04-19.04.35 ZS PMax-0h-1-black-2.jpg:0008-0650	176	184.955	117	205
9	2017-12-04-19.04.35 ZS PMax-0h-1-black-2.jpg:0009-0530	80	176.387	150	209
10	2017-12-04-19.04.35 ZS PMax-0h-1-black-2.jpg:0010-0449	34	155.882	82	192
11	2017-12-04-19.04.35 ZS PMax-0h-1-black-2.jpg:0011-0329	52	163.25	115	201
12	2017-12-04-19.04.35 ZS PMax-0h-1-black-2.jpg:0012-0274	80	124.688	73	175		139.297
0h-1-2
13	2017-12-04-19.04.35 ZS PMax-0h-1-black-3.jpg:0001-1000	86	129.163	91	146
14	2017-12-04-19.04.35 ZS PMax-0h-1-black-3.jpg:0002-1003	104	140.558	102	153
15	2017-12-04-19.04.35 ZS PMax-0h-1-black-3.jpg:0003-0998	115	133	50	156
16	2017-12-04-19.04.35 ZS PMax-0h-1-black-3.jpg:0004-0989	216	140.287	94	178
17	2017-12-04-19.04.35 ZS PMax-0h-1-black-3.jpg:0005-0960	248	155.266	111	172
18	2017-12-04-19.04.35 ZS PMax-0h-1-black-3.jpg:0006-0943	416	145.594	105	182
19	2017-12-04-19.04.35 ZS PMax-0h-1-black-3.jpg:0007-0931	288	150.965	99	197
20	2017-12-04-19.04.35 ZS PMax-0h-1-black-3.jpg:0008-0918	228	168.285	134	195
21	2017-12-04-19.04.35 ZS PMax-0h-1-black-3.jpg:0009-0812	32	159.906	123	179
22	2017-12-04-19.04.35 ZS PMax-0h-1-black-3.jpg:0010-0791	26	157.962	122	178
23	2017-12-04-19.04.35 ZS PMax-0h-1-black-3.jpg:0011-0784	32	171.219	136	194
24	2017-12-04-19.04.35 ZS PMax-0h-1-black-3.jpg:0012-0775	34	175.059	127	204		152.272
0h-1-3
25	2017-12-04-19.04.35 ZS PMax-0h-1-black-4.jpg:0001-2994	96	122.875	54	155
26	2017-12-04-19.04.35 ZS PMax-0h-1-black-4.jpg:0002-2951	89	144.011	76	159
27	2017-12-04-19.04.35 ZS PMax-0h-1-black-4.jpg:0003-2848	51	127.392	82	150
28	2017-12-04-19.04.35 ZS PMax-0h-1-black-4.jpg:0004-3027	69	93.536	38	135
29	2017-12-04-19.04.35 ZS PMax-0h-1-black-4.jpg:0005-2263	69	133.333	76	170
30	2017-12-04-19.04.35 ZS PMax-0h-1-black-4.jpg:0006-2217	52	168.385	134	205
31	2017-12-04-19.04.35 ZS PMax-0h-1-black-4.jpg:0007-2088	86	159.302	106	183
32	2017-12-04-19.04.35 ZS PMax-0h-1-black-4.jpg:0008-1434	96	185.021	102	212
33	2017-12-04-19.04.35 ZS PMax-0h-1-black-4.jpg:0009-1325	96	162.781	111	198
34	2017-12-04-19.04.35 ZS PMax-0h-1-black-4.jpg:0010-0955	34	145.794	121	172
35	2017-12-04-19.04.35 ZS PMax-0h-1-black-4.jpg:0011-0920	26	149.885	127	166
36	2017-12-04-19.04.35 ZS PMax-0h-1-black-4.jpg:0012-0872	34	113.588	52	153
37	2017-12-04-19.04.35 ZS PMax-0h-1-black-4.jpg:0013-0791	26	155.808	97	204		143.209
0h-1-4
38	2017-12-04-19.04.35 ZS PMax-0h-1-black-5.jpg:0001-2086	37	120.027	108	128
39	2017-12-04-19.04.35 ZS PMax-0h-1-black-5.jpg:0002-2010	69	119.667	95	146
40	2017-12-04-19.04.35 ZS PMax-0h-1-black-5.jpg:0003-1880	112	111.286	70	142
41	2017-12-04-19.04.35 ZS PMax-0h-1-black-5.jpg:0004-1769	88	97.67	64	132
42	2017-12-04-19.04.35 ZS PMax-0h-1-black-5.jpg:0005-1437	228	146.798	104	169
43	2017-12-04-19.04.35 ZS PMax-0h-1-black-5.jpg:0006-1476	96	151.323	113	170
44	2017-12-04-19.04.35 ZS PMax-0h-1-black-5.jpg:0007-1134	64	176.578	143	192
45	2017-12-04-19.04.35 ZS PMax-0h-1-black-5.jpg:0008-1087	151	173.444	95	198
46	2017-12-04-19.04.35 ZS PMax-0h-1-black-5.jpg:0009-0808	34	182.706	171	189
47	2017-12-04-19.04.35 ZS PMax-0h-1-black-5.jpg:0010-0714	44	163.023	135	188
48	2017-12-04-19.04.35 ZS PMax-0h-1-black-5.jpg:0011-0620	52	189.308	166	206
49	2017-12-04-19.04.35 ZS PMax-0h-1-black-5.jpg:0012-0542	60	175.317	139	198		150.596
	Label	Area	Mean	Min	Max
4h-1-1
1	2017-12-04-12.39.45 ZS PMax-4h-1-black-1.jpg:0001-1260	96	95.156	77	114
2	2017-12-04-12.39.45 ZS PMax-4h-1-black-1.jpg:0002-1253	79	64.608	45	92
3	2017-12-04-12.39.45 ZS PMax-4h-1-black-1.jpg:0003-1242	86	66.326	46	84
4	2017-12-04-12.39.45 ZS PMax-4h-1-black-1.jpg:0004-1267	60	65.233	56	73
5	2017-12-04-12.39.45 ZS PMax-4h-1-black-1.jpg:0005-1219	190	104.732	82	124
6	2017-12-04-12.39.45 ZS PMax-4h-1-black-1.jpg:0006-1156	192	104.964	66	123
7	2017-12-04-12.39.45 ZS PMax-4h-1-black-1.jpg:0007-1118	300	117.947	73	136
8	2017-12-04-12.39.45 ZS PMax-4h-1-black-1.jpg:0008-1059	164	134.945	106	148
9	2017-12-04-12.39.45 ZS PMax-4h-1-black-1.jpg:0009-1006	84	121.286	73	135
10	2017-12-04-12.39.45 ZS PMax-4h-1-black-1.jpg:0010-0961	70	154.057	139	162
11	2017-12-04-12.39.45 ZS PMax-4h-1-black-1.jpg:0011-0953	37	139.027	123	151
12	2017-12-04-12.39.45 ZS PMax-4h-1-black-1.jpg:0012-0946	51	127	111	137		107.94
4h-1-2
13	2017-12-04-12.41.23 ZS PMax-4h-1-black-2.jpg:0001-2175	37	66.297	58	75
14	2017-12-04-12.41.23 ZS PMax-4h-1-black-2.jpg:0002-2239	44	72.159	64	87
15	2017-12-04-12.41.23 ZS PMax-4h-1-black-2.jpg:0003-2068	70	64.143	59	80
16	2017-12-04-12.41.23 ZS PMax-4h-1-black-2.jpg:0004-2307	32	82.906	79	89
17	2017-12-04-12.41.23 ZS PMax-4h-1-black-2.jpg:0005-1746	156	83.667	60	105
18	2017-12-04-12.41.23 ZS PMax-4h-1-black-2.jpg:0006-1682	240	91.746	64	111
19	2017-12-04-12.41.23 ZS PMax-4h-1-black-2.jpg:0007-1402	216	119.574	104	132
20	2017-12-04-12.41.23 ZS PMax-4h-1-black-2.jpg:0008-1215	156	118.404	84	130
21	2017-12-04-12.41.23 ZS PMax-4h-1-black-2.jpg:0009-0767	60	122.417	104	137
22	2017-12-04-12.41.23 ZS PMax-4h-1-black-2.jpg:0010-0720	60	141.9	114	157
23	2017-12-04-12.41.23 ZS PMax-4h-1-black-2.jpg:0011-0545	36	129.917	114	144
24	2017-12-04-12.41.23 ZS PMax-4h-1-black-2.jpg:0012-0482	32	117.25	104	130		100.865
4h-1-3
25	2017-12-04-12.43.04 ZS PMax-4h-1-black-3.jpg:0001-1599	34	63	55	71
26	2017-12-04-12.43.04 ZS PMax-4h-1-black-3.jpg:0002-1645	44	57.841	49	74
27	2017-12-04-12.43.04 ZS PMax-4h-1-black-3.jpg:0003-1544	34	54.618	44	66
28	2017-12-04-12.43.04 ZS PMax-4h-1-black-3.jpg:0004-1505	36	46.444	40	53
29	2017-12-04-12.43.04 ZS PMax-4h-1-black-3.jpg:0005-1250	60	70.367	45	85
30	2017-12-04-12.43.04 ZS PMax-4h-1-black-3.jpg:0006-1164	69	85.623	72	95
31	2017-12-04-12.43.04 ZS PMax-4h-1-black-3.jpg:0007-1083	69	96.652	80	109
32	2017-12-04-12.43.04 ZS PMax-4h-1-black-3.jpg:0008-0993	70	84.814	64	102
33	2017-12-04-12.43.04 ZS PMax-4h-1-black-3.jpg:0009-0837	37	100	87	109
34	2017-12-04-12.43.04 ZS PMax-4h-1-black-3.jpg:0010-0763	36	143.167	133	148
35	2017-12-04-12.43.04 ZS PMax-4h-1-black-3.jpg:0011-0560	86	126.663	104	138
36	2017-12-04-12.43.04 ZS PMax-4h-1-black-3.jpg:0012-0441	44	137.75	116	152		88.9116
4h-1-4
37	2017-12-04-12.50.10 ZS PMax-4h-1-black-7.jpg:0001-4939	288	82.622	56	104
38	2017-12-04-12.50.10 ZS PMax-4h-1-black-7.jpg:0002-4794	240	92.404	63	127
39	2017-12-04-12.50.10 ZS PMax-4h-1-black-7.jpg:0003-5037	190	74.789	55	100
40	2017-12-04-12.50.10 ZS PMax-4h-1-black-7.jpg:0004-5120	151	76.781	56	94
41	2017-12-04-12.50.10 ZS PMax-4h-1-black-7.jpg:0005-3880	860	113.75	63	138
42	2017-12-04-12.50.10 ZS PMax-4h-1-black-7.jpg:0006-3583	800	112.606	65	139
43	2017-12-04-12.50.10 ZS PMax-4h-1-black-7.jpg:0007-2967	1024	132.463	88	163
44	2017-12-04-12.50.10 ZS PMax-4h-1-black-7.jpg:0008-2718	1008	120.178	65	161
45	2017-12-04-12.50.10 ZS PMax-4h-1-black-7.jpg:0009-2092	444	137.306	69	163
46	2017-12-04-12.50.10 ZS PMax-4h-1-black-7.jpg:0010-1784	484	106.944	60	137
47	2017-12-04-12.50.10 ZS PMax-4h-1-black-7.jpg:0011-1419	172	170.988	134	180
48	2017-12-04-12.50.10 ZS PMax-4h-1-black-7.jpg:0012-1030	340	156.174	83	178		114.75
4h-1-5
49	2017-12-04-19.46.38 ZS PMax-8h-1-black-1.jpg:0001-2359	44	125.159	108	141
50	2017-12-04-19.46.38 ZS PMax-8h-1-black-1.jpg:0002-2291	37	123.216	108	136
51	2017-12-04-19.46.38 ZS PMax-8h-1-black-1.jpg:0003-2193	70	128.657	92	143
52	2017-12-04-19.46.38 ZS PMax-8h-1-black-1.jpg:0004-2408	34	131.235	92	147
53	2017-12-04-19.46.38 ZS PMax-8h-1-black-1.jpg:0005-1637	104	128.452	93	159
54	2017-12-04-19.46.38 ZS PMax-8h-1-black-1.jpg:0006-1561	104	146.644	99	166
55	2017-12-04-19.46.38 ZS PMax-8h-1-black-1.jpg:0007-1437	104	151.49	115	183
56	2017-12-04-19.46.38 ZS PMax-8h-1-black-1.jpg:0008-1382	124	159.855	122	188
57	2017-12-04-19.46.38 ZS PMax-8h-1-black-1.jpg:0009-1072	68	160.853	112	188
58	2017-12-04-19.46.38 ZS PMax-8h-1-black-1.jpg:0010-1034	86	171.535	142	189
59	2017-12-04-19.46.38 ZS PMax-8h-1-black-1.jpg:0011-0984	79	144.354	48	195
60	2017-12-04-19.46.38 ZS PMax-8h-1-black-1.jpg:0012-0687	37	162.486	117	199		144.495
	Label	Area	Mean	Min	Max
8h-1-1
1	2017-12-04-19.46.38 ZS PMax-8h-1-black-1.jpg:0001-2362	69	124.29	81	139
2	2017-12-04-19.46.38 ZS PMax-8h-1-black-1.jpg:0002-2293	72	121.014	104	133
3	2017-12-04-19.46.38 ZS PMax-8h-1-black-1.jpg:0003-2227	126	121.556	84	144
4	2017-12-04-19.46.38 ZS PMax-8h-1-black-1.jpg:0004-2176	104	122.135	99	138
5	2017-12-04-19.46.38 ZS PMax-8h-1-black-1.jpg:0005-1701	44	154.341	129	166
6	2017-12-04-19.46.38 ZS PMax-8h-1-black-1.jpg:0006-1635	115	131.417	93	162
7	2017-12-04-19.46.38 ZS PMax-8h-1-black-1.jpg:0007-1435	136	150.529	115	180
8	2017-12-04-19.46.38 ZS PMax-8h-1-black-1.jpg:0008-1380	124	160.871	126	188
9	2017-12-04-19.46.38 ZS PMax-8h-1-black-1.jpg:0009-1068	80	142.35	103	188
10	2017-12-04-19.46.38 ZS PMax-8h-1-black-1.jpg:0010-1030	96	169.135	129	196
11	2017-12-04-19.46.38 ZS PMax-8h-1-black-1.jpg:0011-0984	44	162.159	127	195
12	2017-12-04-19.46.38 ZS PMax-8h-1-black-1.jpg:0012-0752	34	151.647	104	176		142.62
8h-1-2
13	2017-12-04-19.46.38 ZS PMax-8h-1-black-3.jpg:0001-0893	70	58.586	28	107
14	2017-12-04-19.46.38 ZS PMax-8h-1-black-3.jpg:0002-0950	96	53.656	17	105
15	2017-12-04-19.46.38 ZS PMax-8h-1-black-3.jpg:0003-1035	58	70.948	46	91
16	2017-12-04-19.46.38 ZS PMax-8h-1-black-3.jpg:0004-1098	80	70.75	13	109
17	2017-12-04-19.46.38 ZS PMax-8h-1-black-3.jpg:0005-1522	146	58.856	16	94
18	2017-12-04-19.46.38 ZS PMax-8h-1-black-3.jpg:0006-1659	140	61.207	11	94
19	2017-12-04-19.46.38 ZS PMax-8h-1-black-3.jpg:0007-1795	176	96.881	27	120
20	2017-12-04-19.46.38 ZS PMax-8h-1-black-3.jpg:0008-2079	214	127.276	64	158
21	2017-12-04-19.46.38 ZS PMax-8h-1-black-3.jpg:0009-2405	60	169.4	121	203
22	2017-12-04-19.46.38 ZS PMax-8h-1-black-3.jpg:0010-2449	70	160.786	55	196
23	2017-12-04-19.46.38 ZS PMax-8h-1-black-3.jpg:0011-2563	86	166.535	102	197
24	2017-12-04-19.46.38 ZS PMax-8h-1-black-3.jpg:0012-2775	51	128	82	158		101.907
8h-1-3
25	2017-12-04-19.46.38 ZS PMax-8h-1-black-4.jpg:0001-0836	69	56.217	32	82
26	2017-12-04-19.46.38 ZS PMax-8h-1-black-4.jpg:0002-0806	36	63.028	33	81
27	2017-12-04-19.46.38 ZS PMax-8h-1-black-4.jpg:0003-0868	97	68.536	39	118
28	2017-12-04-19.46.38 ZS PMax-8h-1-black-4.jpg:0004-0889	60	83.767	41	123
29	2017-12-04-19.46.38 ZS PMax-8h-1-black-4.jpg:0005-1040	104	94.75	56	115
30	2017-12-04-19.46.38 ZS PMax-8h-1-black-4.jpg:0006-1123	124	94.427	53	117
31	2017-12-04-19.46.38 ZS PMax-8h-1-black-4.jpg:0007-1208	176	96.761	62	118
32	2017-12-04-19.46.38 ZS PMax-8h-1-black-4.jpg:0008-1278	156	92.147	58	128
33	2017-12-04-19.46.38 ZS PMax-8h-1-black-4.jpg:0009-1777	104	162.846	130	178
34	2017-12-04-19.46.38 ZS PMax-8h-1-black-4.jpg:0010-1886	126	147.071	89	178
35	2017-12-04-19.46.38 ZS PMax-8h-1-black-4.jpg:0011-1929	104	134.885	72	167
36	2017-12-04-19.46.38 ZS PMax-8h-1-black-4.jpg:0012-2072	70	160.129	88	203		104.547
8h-1-4
37	2017-12-04-19.46.38 ZS PMax-8h-1-black-5.jpg:0001-2956	102	95.598	45	147
38	2017-12-04-19.46.38 ZS PMax-8h-1-black-5.jpg:0002-2882	70	86.471	37	137
39	2017-12-04-19.46.38 ZS PMax-8h-1-black-5.jpg:0003-2801	70	101.386	56	125
40	2017-12-04-19.46.38 ZS PMax-8h-1-black-5.jpg:0004-2770	70	113.371	77	144
41	2017-12-04-19.46.38 ZS PMax-8h-1-black-5.jpg:0005-2494	80	120.85	52	150
42	2017-12-04-19.46.38 ZS PMax-8h-1-black-5.jpg:0006-2619	52	118.327	89	128
43	2017-12-04-19.46.38 ZS PMax-8h-1-black-5.jpg:0007-1995	84	124.905	101	160
44	2017-12-04-19.46.38 ZS PMax-8h-1-black-5.jpg:0008-1870	146	129.616	97	154
45	2017-12-04-19.46.38 ZS PMax-8h-1-black-5.jpg:0009-1142	52	163.788	109	193
46	2017-12-04-19.46.38 ZS PMax-8h-1-black-5.jpg:0010-0990	52	180.365	131	203
47	2017-12-04-19.46.38 ZS PMax-8h-1-black-5.jpg:0011-0763	37	180.73	152	203
48	2017-12-04-19.46.38 ZS PMax-8h-1-black-5.jpg:0012-0697	36	143.667	101	167		129.923
	Label	Area	Mean	Min	Max
12h-1-1
1	2017-12-04-20.27.17 ZS PMax-12h-1-black-1.jpg:0001-3216	79	66.228	17	136
2	2017-12-04-20.27.17 ZS PMax-12h-1-black-1.jpg:0002-3071	72	45.514	21	91
3	2017-12-04-20.27.17 ZS PMax-12h-1-black-1.jpg:0003-2994	124	29.952	18	48
4	2017-12-04-20.27.17 ZS PMax-12h-1-black-1.jpg:0004-2876	133	26.925	12	71
5	2017-12-04-20.27.17 ZS PMax-12h-1-black-1.jpg:0005-2288	133	56.06	14	91
6	2017-12-04-20.27.17 ZS PMax-12h-1-black-1.jpg:0006-2154	156	70.763	14	113
7	2017-12-04-20.27.17 ZS PMax-12h-1-black-1.jpg:0007-1421	216	116.847	46	173
8	2017-12-04-20.27.17 ZS PMax-12h-1-black-1.jpg:0008-1326	274	99.405	13	164
9	2017-12-04-20.27.17 ZS PMax-12h-1-black-1.jpg:0009-0840	86	147	63	207
10	2017-12-04-20.27.17 ZS PMax-12h-1-black-1.jpg:0010-0720	86	163.64	68	197
11	2017-12-04-20.27.17 ZS PMax-12h-1-black-1.jpg:0011-0566	44	134.25	89	166
12	2017-12-04-20.27.17 ZS PMax-12h-1-black-1.jpg:0012-0488	26	187.038	161	218		95.3018
12h-1-2
13	2017-12-04-20.27.17 ZS PMax-12h-1-black-2.jpg:0001-2207	86	72.407	35	110
14	2017-12-04-20.27.17 ZS PMax-12h-1-black-2.jpg:0002-2230	69	69.377	56	90
15	2017-12-04-20.27.17 ZS PMax-12h-1-black-2.jpg:0003-2178	104	85.75	57	126
16	2017-12-04-20.27.17 ZS PMax-12h-1-black-2.jpg:0004-2147	86	74.384	47	108
17	2017-12-04-20.27.17 ZS PMax-12h-1-black-2.jpg:0005-1987	124	74.169	34	101
18	2017-12-04-20.27.17 ZS PMax-12h-1-black-2.jpg:0006-1907	126	81.659	45	111
19	2017-12-04-20.27.17 ZS PMax-12h-1-black-2.jpg:0007-1593	137	88.679	46	134
20	2017-12-04-20.27.17 ZS PMax-12h-1-black-2.jpg:0008-1523	102	102.059	54	133
21	2017-12-04-20.27.17 ZS PMax-12h-1-black-2.jpg:0009-1255	69	131.594	85	147
22	2017-12-04-20.27.17 ZS PMax-12h-1-black-2.jpg:0010-1160	140	136.236	55	202
23	2017-12-04-20.27.17 ZS PMax-12h-1-black-2.jpg:0011-0945	52	182.269	115	207
24	2017-12-04-20.27.17 ZS PMax-12h-1-black-2.jpg:0012-0878	97	159.021	89	220		104.8
12h-1-3
25	2017-12-04-20.27.17 ZS PMax-12h-1-black-3.jpg:0001-0506	52	36.365	20	69
26	2017-12-04-20.27.17 ZS PMax-12h-1-black-3.jpg:0002-0525	37	28.649	17	50
27	2017-12-04-20.27.17 ZS PMax-12h-1-black-3.jpg:0003-0559	60	19.917	10	35
28	2017-12-04-20.27.17 ZS PMax-12h-1-black-3.jpg:0004-0488	32	33.781	22	54
29	2017-12-04-20.27.17 ZS PMax-12h-1-black-3.jpg:0005-1162	80	104.388	46	129
30	2017-12-04-20.27.17 ZS PMax-12h-1-black-3.jpg:0006-1092	60	97.317	32	132
31	2017-12-04-20.27.17 ZS PMax-12h-1-black-3.jpg:0007-0935	86	50.872	27	74
32	2017-12-04-20.27.17 ZS PMax-12h-1-black-3.jpg:0008-0766	70	52.386	22	76
33	2017-12-04-20.27.17 ZS PMax-12h-1-black-3.jpg:0009-1332	86	137.547	76	165
34	2017-12-04-20.27.17 ZS PMax-12h-1-black-3.jpg:0010-1521	44	158	128	175
35	2017-12-04-20.27.17 ZS PMax-12h-1-black-3.jpg:0011-1575	79	132.253	68	175
36	2017-12-04-20.27.17 ZS PMax-12h-1-black-3.jpg:0012-1914	86	131.523	90	161		81.9165
12h-1-4
37	2017-12-04-20.27.17 ZS PMax-12h-1-black-4.jpg:0001-2867	26	103.308	64	120
38	2017-12-04-20.27.17 ZS PMax-12h-1-black-4.jpg:0002-2816	34	37.735	23	48
39	2017-12-04-20.27.17 ZS PMax-12h-1-black-4.jpg:0003-2736	34	53.176	17	72
40	2017-12-04-20.27.17 ZS PMax-12h-1-black-4.jpg:0004-2696	44	32.273	12	66
41	2017-12-04-20.27.17 ZS PMax-12h-1-black-4.jpg:0005-2068	86	51.651	8	80
42	2017-12-04-20.27.17 ZS PMax-12h-1-black-4.jpg:0006-1929	112	53.643	15	94
43	2017-12-04-20.27.17 ZS PMax-12h-1-black-4.jpg:0007-1702	115	60.313	10	94
44	2017-12-04-20.27.17 ZS PMax-12h-1-black-4.jpg:0008-1582	146	53.637	16	98
45	2017-12-04-20.27.17 ZS PMax-12h-1-black-4.jpg:0009-0905	34	174.529	106	202
46	2017-12-04-20.27.17 ZS PMax-12h-1-black-4.jpg:0010-0880	37	163.405	130	193
47	2017-12-04-20.27.17 ZS PMax-12h-1-black-4.jpg:0011-0975	51	165.216	134	192
48	2017-12-04-20.27.17 ZS PMax-12h-1-black-4.jpg:0012-0750	32	168.531	127	198		93.1181
	Label	Area	Mean	Min	Max
16h-1-1
1	2017-12-04-21.20.12 ZS PMax-16h-1-black-1.jpg:0001-1467	26	90.731	68	103
2	2017-12-04-21.20.12 ZS PMax-16h-1-black-1.jpg:0002-1451	34	85.824	68	103
3	2017-12-04-21.20.12 ZS PMax-16h-1-black-1.jpg:0003-1438	31	81.935	63	94
4	2017-12-04-21.20.12 ZS PMax-16h-1-black-1.jpg:0004-1482	21	78.762	62	97
5	2017-12-04-21.20.12 ZS PMax-16h-1-black-1.jpg:0005-1312	70	98.514	70	117
6	2017-12-04-21.20.12 ZS PMax-16h-1-black-1.jpg:0006-1219	86	93.116	71	105
7	2017-12-04-21.20.12 ZS PMax-16h-1-black-1.jpg:0007-1117	124	78.661	35	113
8	2017-12-04-21.20.12 ZS PMax-16h-1-black-1.jpg:0008-0999	137	78.219	56	97
9	2017-12-04-21.20.12 ZS PMax-16h-1-black-1.jpg:0009-0636	37	138.324	120	150
10	2017-12-04-21.20.12 ZS PMax-16h-1-black-1.jpg:0010-0596	70	117.886	80	142
11	2017-12-04-21.20.12 ZS PMax-16h-1-black-1.jpg:0011-0575	44	125.455	89	143
12	2017-12-04-21.20.12 ZS PMax-16h-1-black-1.jpg:0012-0499	21	87.381	61	100		96.234
16h-1-2
13	2017-12-04-21.20.12 ZS PMax-16h-1-black-2.jpg:0001-0924	16	106.5	71	122
14	2017-12-04-21.20.12 ZS PMax-16h-1-black-2.jpg:0002-0920	34	58.176	46	76
15	2017-12-04-21.20.12 ZS PMax-16h-1-black-2.jpg:0003-0931	32	44.906	36	53
16	2017-12-04-21.20.12 ZS PMax-16h-1-black-2.jpg:0004-0911	44	66.205	57	83
17	2017-12-04-21.20.12 ZS PMax-16h-1-black-2.jpg:0005-0864	69	91.594	72	113
18	2017-12-04-21.20.12 ZS PMax-16h-1-black-2.jpg:0006-0637	166	92.199	65	118
19	2017-12-04-21.20.12 ZS PMax-16h-1-black-2.jpg:0007-0530	156	88.712	50	110
20	2017-12-04-21.20.12 ZS PMax-16h-1-black-2.jpg:0008-0475	104	96.875	68	114
21	2017-12-04-21.20.12 ZS PMax-16h-1-black-2.jpg:0009-0377	97	99	56	127
22	2017-12-04-21.20.12 ZS PMax-16h-1-black-2.jpg:0010-0306	32	146.344	133	156
23	2017-12-04-21.20.12 ZS PMax-16h-1-black-2.jpg:0011-0264	44	132.773	107	148
24	2017-12-04-21.20.12 ZS PMax-16h-1-black-2.jpg:0012-0177	34	125.941	101	155
25	2017-12-04-21.20.12 ZS PMax-16h-1-black-2.jpg:0013-0123	37	177.216	160	186		102.034
16h-1-3
26	2017-12-04-21.20.12 ZS PMax-16h-1-black-3.jpg:0001-1034	26	48.654	17	79
27	2017-12-04-21.20.12 ZS PMax-16h-1-black-3.jpg:0002-1040	34	61.588	39	101
28	2017-12-04-21.20.12 ZS PMax-16h-1-black-3.jpg:0003-1049	37	46.135	26	66
29	2017-12-04-21.20.12 ZS PMax-16h-1-black-3.jpg:0004-1025	21	31.143	21	46
30	2017-12-04-21.20.12 ZS PMax-16h-1-black-3.jpg:0005-1060	86	70.5	37	103
31	2017-12-04-21.20.12 ZS PMax-16h-1-black-3.jpg:0006-1037	177	91.311	58	130
32	2017-12-04-21.20.12 ZS PMax-16h-1-black-3.jpg:0007-0989	70	87.986	49	110
33	2017-12-04-21.20.12 ZS PMax-16h-1-black-3.jpg:0008-0964	70	90	68	109
34	2017-12-04-21.20.12 ZS PMax-16h-1-black-3.jpg:0009-0926	34	101.706	77	111
35	2017-12-04-21.20.12 ZS PMax-16h-1-black-3.jpg:0010-0903	34	120.588	94	139
36	2017-12-04-21.20.12 ZS PMax-16h-1-black-3.jpg:0011-0889	34	121.265	75	149
37	2017-12-04-21.20.12 ZS PMax-16h-1-black-3.jpg:0012-0877	26	158.885	124	179		85.8134
16h-1-4
38	2017-12-04-21.20.12 ZS PMax-16h-1-black-4.jpg:0001-0596	52	80.865	42	120
39	2017-12-04-21.20.12 ZS PMax-16h-1-black-4.jpg:0002-0635	52	85.712	53	131
40	2017-12-04-21.20.12 ZS PMax-16h-1-black-4.jpg:0003-0716	69	79.159	34	113
41	2017-12-04-21.20.12 ZS PMax-16h-1-black-4.jpg:0004-0665	112	90.152	28	127
42	2017-12-04-21.20.12 ZS PMax-16h-1-black-4.jpg:0005-0813	148	68.635	32	96
43	2017-12-04-21.20.12 ZS PMax-16h-1-black-4.jpg:0006-0895	102	61.088	30	91
44	2017-12-04-21.20.12 ZS PMax-16h-1-black-4.jpg:0007-1003	124	63.29	27	99
45	2017-12-04-21.20.12 ZS PMax-16h-1-black-4.jpg:0008-1072	102	61.059	34	93
46	2017-12-04-21.20.12 ZS PMax-16h-1-black-4.jpg:0009-1177	136	77.015	41	108
47	2017-12-04-21.20.12 ZS PMax-16h-1-black-4.jpg:0010-1252	86	75.326	36	110
48	2017-12-04-21.20.12 ZS PMax-16h-1-black-4.jpg:0011-1302	16	78.312	62	91
49	2017-12-04-21.20.12 ZS PMax-16h-1-black-4.jpg:0012-1341	16	92.438	77	106		76.0876
	Label	Area	Mean	Min	Max
20h-1-1
1	2017-12-04-22.57.47 ZS PMax-20h-1-black-1.jpg:0001-0554	96	41.094	23	70
2	2017-12-04-22.57.47 ZS PMax-20h-1-black-1.jpg:0002-0564	102	66.343	26	109
3	2017-12-04-22.57.47 ZS PMax-20h-1-black-1.jpg:0003-0576	70	55.814	17	95
4	2017-12-04-22.57.47 ZS PMax-20h-1-black-1.jpg:0004-0546	52	34.038	21	48
5	2017-12-04-22.57.47 ZS PMax-20h-1-black-1.jpg:0005-0788	192	57.927	16	93
6	2017-12-04-22.57.47 ZS PMax-20h-1-black-1.jpg:0006-0878	216	44.37	17	75
7	2017-12-04-22.57.47 ZS PMax-20h-1-black-1.jpg:0007-1038	216	37.032	10	77
8	2017-12-04-22.57.47 ZS PMax-20h-1-black-1.jpg:0008-0681	238	56.496	11	92
9	2017-12-04-22.57.47 ZS PMax-20h-1-black-1.jpg:0009-1183	166	50.994	17	96
10	2017-12-04-22.57.47 ZS PMax-20h-1-black-1.jpg:0010-1220	115	69.617	5	125
11	2017-12-04-22.57.47 ZS PMax-20h-1-black-1.jpg:0011-1307	69	111.29	26	151
12	2017-12-04-22.57.47 ZS PMax-20h-1-black-1.jpg:0012-1396	52	80.135	30	125		58.7625
20h-1-2
13	2017-12-04-22.57.47 ZS PMax-20h-1-black-2.jpg:0001-2218	34	74.735	53	97
14	2017-12-04-22.57.47 ZS PMax-20h-1-black-2.jpg:0002-2183	37	73.595	47	98
15	2017-12-04-22.57.47 ZS PMax-20h-1-black-2.jpg:0003-2140	44	67.773	48	86
16	2017-12-04-22.57.47 ZS PMax-20h-1-black-2.jpg:0004-2255	32	59.781	49	74
17	2017-12-04-22.57.47 ZS PMax-20h-1-black-2.jpg:0005-1699	60	85.1	53	99
18	2017-12-04-22.57.47 ZS PMax-20h-1-black-2.jpg:0006-1547	60	75.917	53	94
19	2017-12-04-22.57.47 ZS PMax-20h-1-black-2.jpg:0007-1352	80	65.388	44	90
20	2017-12-04-22.57.47 ZS PMax-20h-1-black-2.jpg:0008-1041	104	52.01	39	74
21	2017-12-04-22.57.47 ZS PMax-20h-1-black-2.jpg:0009-0713	60	71.35	48	92
22	2017-12-04-22.57.47 ZS PMax-20h-1-black-2.jpg:0010-0576	70	57.486	40	71
23	2017-12-04-22.57.47 ZS PMax-20h-1-black-2.jpg:0011-0473	44	51.477	41	67
24	2017-12-04-22.57.47 ZS PMax-20h-1-black-2.jpg:0012-0354	52	23.962	16	37		63.2145
20h-1-3
25	2017-12-04-22.57.47 ZS PMax-20h-1-black-3.jpg:0001-2643	86	70.093	45	103
26	2017-12-04-22.57.47 ZS PMax-20h-1-black-3.jpg:0002-2675	60	41.067	24	64
27	2017-12-04-22.57.47 ZS PMax-20h-1-black-3.jpg:0003-2608	52	66.712	36	106
28	2017-12-04-22.57.47 ZS PMax-20h-1-black-3.jpg:0004-2580	60	58.617	15	99
29	2017-12-04-22.57.47 ZS PMax-20h-1-black-3.jpg:0005-2400	86	67.279	38	80
30	2017-12-04-22.57.47 ZS PMax-20h-1-black-3.jpg:0006-2242	70	64.843	46	83
31	2017-12-04-22.57.47 ZS PMax-20h-1-black-3.jpg:0007-1849	86	61.756	32	84
32	2017-12-04-22.57.47 ZS PMax-20h-1-black-3.jpg:0008-1760	86	68.57	47	83
33	2017-12-04-22.57.47 ZS PMax-20h-1-black-3.jpg:0009-1582	60	64.367	37	81
34	2017-12-04-22.57.47 ZS PMax-20h-1-black-3.jpg:0010-1530	52	67.673	37	91
35	2017-12-04-22.57.47 ZS PMax-20h-1-black-3.jpg:0011-1474	44	68.659	47	78
36	2017-12-04-22.57.47 ZS PMax-20h-1-black-3.jpg:0012-1414	60	53.917	30	88		62.7961
20h-1-4
37	2017-12-04-22.57.47 ZS PMax-20h-1-black-4.jpg:0001-3038	52	74.962	65	96
38	2017-12-04-22.57.47 ZS PMax-20h-1-black-4.jpg:0002-3088	51	71.02	64	89
39	2017-12-04-22.57.47 ZS PMax-20h-1-black-4.jpg:0003-2967	60	72.15	62	92
40	2017-12-04-22.57.47 ZS PMax-20h-1-black-4.jpg:0004-2893	64	89.344	46	118
41	2017-12-04-22.57.47 ZS PMax-20h-1-black-4.jpg:0005-2453	44	74.432	34	96
42	2017-12-04-22.57.47 ZS PMax-20h-1-black-4.jpg:0006-2281	80	82.838	67	93
43	2017-12-04-22.57.47 ZS PMax-20h-1-black-4.jpg:0007-1879	69	76.87	47	95
44	2017-12-04-22.57.47 ZS PMax-20h-1-black-4.jpg:0008-1673	97	63.701	38	88
45	2017-12-04-22.57.47 ZS PMax-20h-1-black-4.jpg:0009-1298	79	64.456	37	81
46	2017-12-04-22.57.47 ZS PMax-20h-1-black-4.jpg:0010-1198	44	78.318	52	97
47	2017-12-04-22.57.47 ZS PMax-20h-1-black-4.jpg:0011-1112	58	52.948	41	65
48	2017-12-04-22.57.47 ZS PMax-20h-1-black-4.jpg:0012-0892	156	62.712	42	91		71.9792
	Label	Area	Mean	Min	Max
24h-1-1
1	2017-12-04-23.56.20 ZS PMax-24h-1-black-1.jpg:0001-0570	52	100.885	74	129
2	2017-12-04-23.56.20 ZS PMax-24h-1-black-1.jpg:0002-0544	44	77.182	57	98
3	2017-12-04-23.56.20 ZS PMax-24h-1-black-1.jpg:0003-0601	80	103.938	69	132
4	2017-12-04-23.56.20 ZS PMax-24h-1-black-1.jpg:0004-0634	70	98.6	69	116
5	2017-12-04-23.56.20 ZS PMax-24h-1-black-1.jpg:0005-0774	124	69.435	51	92
6	2017-12-04-23.56.20 ZS PMax-24h-1-black-1.jpg:0006-0904	166	48.651	28	71
7	2017-12-04-23.56.20 ZS PMax-24h-1-black-1.jpg:0007-0976	124	69.266	53	96
8	2017-12-04-23.56.20 ZS PMax-24h-1-black-1.jpg:0008-1072	151	75.834	50	105
9	2017-12-04-23.56.20 ZS PMax-24h-1-black-1.jpg:0009-1134	52	89.365	62	110
10	2017-12-04-23.56.20 ZS PMax-24h-1-black-1.jpg:0010-1234	69	94.217	75	103
11	2017-12-04-23.56.20 ZS PMax-24h-1-black-1.jpg:0011-1326	31	90.742	71	102
12	2017-12-04-23.56.20 ZS PMax-24h-1-black-1.jpg:0012-1386	37	88.216	71	110		83.8609
24h-1-2
13	2017-12-05-00.14.45 ZS PMax-24h-1-black-2.jpg:0001-0324	44	41.068	32	58
14	2017-12-05-00.14.45 ZS PMax-24h-1-black-2.jpg:0002-0374	70	57.129	32	80
15	2017-12-05-00.14.45 ZS PMax-24h-1-black-2.jpg:0003-0471	51	39.686	19	54
16	2017-12-05-00.14.45 ZS PMax-24h-1-black-2.jpg:0004-0553	70	38.871	25	56
17	2017-12-05-00.14.45 ZS PMax-24h-1-black-2.jpg:0005-0802	102	35.549	24	56
18	2017-12-05-00.14.45 ZS PMax-24h-1-black-2.jpg:0006-1171	137	29.314	19	47
19	2017-12-05-00.14.45 ZS PMax-24h-1-black-2.jpg:0007-1518	151	38.437	19	67
20	2017-12-05-00.14.45 ZS PMax-24h-1-black-2.jpg:0008-2066	133	28.271	19	47
21	2017-12-05-00.14.45 ZS PMax-24h-1-black-2.jpg:0009-2208	70	43.614	29	68
22	2017-12-05-00.14.45 ZS PMax-24h-1-black-2.jpg:0010-2299	44	19.227	12	31
23	2017-12-05-00.14.45 ZS PMax-24h-1-black-2.jpg:0011-2465	37	28	18	44
24	2017-12-05-00.14.45 ZS PMax-24h-1-black-2.jpg:0012-2577	32	40.781	35	52		36.6623
24h-1-3
25	2017-12-04-23.56.20 ZS PMax-24h-1-black-3.jpg:0001-1334	112	55.393	32	85
26	2017-12-04-23.56.20 ZS PMax-24h-1-black-3.jpg:0002-1258	124	55.347	40	84
27	2017-12-04-23.56.20 ZS PMax-24h-1-black-3.jpg:0003-1394	97	60.928	30	92
28	2017-12-04-23.56.20 ZS PMax-24h-1-black-3.jpg:0004-1196	112	54.196	41	74
29	2017-12-04-23.56.20 ZS PMax-24h-1-black-3.jpg:0005-1087	177	43.582	28	67
30	2017-12-04-23.56.20 ZS PMax-24h-1-black-3.jpg:0006-0990	140	27.129	17	64
31	2017-12-04-23.56.20 ZS PMax-24h-1-black-3.jpg:0007-0871	136	50.081	27	79
32	2017-12-04-23.56.20 ZS PMax-24h-1-black-3.jpg:0008-0814	124	32.774	22	67
33	2017-12-04-23.56.20 ZS PMax-24h-1-black-3.jpg:0009-0754	124	64.895	35	96
34	2017-12-04-23.56.20 ZS PMax-24h-1-black-3.jpg:0010-0695	97	43.021	32	63
35	2017-12-04-23.56.20 ZS PMax-24h-1-black-3.jpg:0011-0642	86	39.558	28	65
36	2017-12-04-23.56.20 ZS PMax-24h-1-black-3.jpg:0012-0592	115	38.93	17	85		47.1528
24h-1-4
37	2017-12-04-23.56.20 ZS PMax-24h-1-black-4.jpg:0001-0439	52	69.5	50	91
38	2017-12-04-23.56.20 ZS PMax-24h-1-black-4.jpg:0002-0481	79	68.772	59	82
39	2017-12-04-23.56.20 ZS PMax-24h-1-black-4.jpg:0003-0510	70	55.814	46	70
40	2017-12-04-23.56.20 ZS PMax-24h-1-black-4.jpg:0004-0535	80	72.6	47	105
41	2017-12-04-23.56.20 ZS PMax-24h-1-black-4.jpg:0005-0637	96	48.219	39	63
42	2017-12-04-23.56.20 ZS PMax-24h-1-black-4.jpg:0006-0745	115	48.087	32	70
43	2017-12-04-23.56.20 ZS PMax-24h-1-black-4.jpg:0007-1037	166	37.614	24	61
44	2017-12-04-23.56.20 ZS PMax-24h-1-black-4.jpg:0008-1276	148	40.709	33	66
45	2017-12-04-23.56.20 ZS PMax-24h-1-black-4.jpg:0009-1382	124	39.452	32	59
46	2017-12-04-23.56.20 ZS PMax-24h-1-black-4.jpg:0010-1435	136	38.897	27	60
47	2017-12-04-23.56.20 ZS PMax-24h-1-black-4.jpg:0011-1481	112	37.491	22	69
48	2017-12-04-23.56.20 ZS PMax-24h-1-black-4.jpg:0012-1529	70	20.514	9	74		48.1391
	Label	Area	Mean	Min	Max
adult-1-1
1	2018-01-01-12.08.56 ZS PMax-adult-1-black-1.jpg:0001-3985	44	71.068	37	87
2	2018-01-01-12.08.56 ZS PMax-adult-1-black-1.jpg:0002-4040	48	56.167	29	80
3	2018-01-01-12.08.56 ZS PMax-adult-1-black-1.jpg:0003-3878	44	72.909	19	97
4	2018-01-01-12.08.56 ZS PMax-adult-1-black-1.jpg:0004-3808	69	67.13	21	96
5	2018-01-01-12.08.56 ZS PMax-adult-1-black-1.jpg:0005-3406	97	64.237	24	85
6	2018-01-01-12.08.56 ZS PMax-adult-1-black-1.jpg:0006-3078	97	61.485	29	81
7	2018-01-01-12.08.56 ZS PMax-adult-1-black-1.jpg:0007-2526	115	85.574	30	118
8	2018-01-01-12.08.56 ZS PMax-adult-1-black-1.jpg:0008-2109	140	52.986	23	87
9	2018-01-01-12.08.56 ZS PMax-adult-1-black-1.jpg:0009-1919	86	18.942	15	24
10	2018-01-01-12.08.56 ZS PMax-adult-1-black-1.jpg:0010-1798	80	18.025	15	21
11	2018-01-01-12.08.56 ZS PMax-adult-1-black-1.jpg:0011-1613	96	15.615	11	24
12	2018-01-01-12.08.56 ZS PMax-adult-1-black-1.jpg:0012-1514	69	17.536	12	24		50.1395
adult-1-2
13	2018-01-01-12.08.56 ZS PMax-adult-1-black-1.jpg:0001-3332	37	65.676	31	101
14	2018-01-01-12.08.56 ZS PMax-adult-1-black-1.jpg:0002-3368	26	54.5	33	70
15	2018-01-01-12.08.56 ZS PMax-adult-1-black-1.jpg:0003-3282	37	82.919	49	99
16	2018-01-01-12.08.56 ZS PMax-adult-1-black-1.jpg:0004-3197	37	59.459	43	71
17	2018-01-01-12.08.56 ZS PMax-adult-1-black-1.jpg:0005-2985	69	54.928	30	76
18	2018-01-01-12.08.56 ZS PMax-adult-1-black-1.jpg:0006-2624	70	55.871	29	75
19	2018-01-01-12.08.56 ZS PMax-adult-1-black-1.jpg:0007-2388	97	56.629	38	72
20	2018-01-01-12.08.56 ZS PMax-adult-1-black-1.jpg:0008-1986	70	59.071	40	71
21	2018-01-01-12.08.56 ZS PMax-adult-1-black-1.jpg:0009-1363	207	49.696	22	85
22	2018-01-01-12.08.56 ZS PMax-adult-1-black-1.jpg:0010-1216	192	48.812	26	76
23	2018-01-01-12.08.56 ZS PMax-adult-1-black-1.jpg:0011-0961	177	23.537	13	44
24	2018-01-01-12.08.56 ZS PMax-adult-1-black-1.jpg:0012-0782	124	19.258	12	42		52.5297
adult-1-3
25	2018-01-01-12.08.56 ZS PMax-adult-1-black-2.jpg:0001-2620	44	51.295	15	86
26	2018-01-01-12.08.56 ZS PMax-adult-1-black-2.jpg:0002-2571	70	51.271	10	92
27	2018-01-01-12.08.56 ZS PMax-adult-1-black-2.jpg:0003-2470	70	52.043	11	83
28	2018-01-01-12.08.56 ZS PMax-adult-1-black-2.jpg:0004-2398	86	45.988	16	72
29	2018-01-01-12.08.56 ZS PMax-adult-1-black-2.jpg:0005-1996	156	33.84	6	65
30	2018-01-01-12.08.56 ZS PMax-adult-1-black-2.jpg:0006-1694	166	18.669	8	41
31	2018-01-01-12.08.56 ZS PMax-adult-1-black-2.jpg:0007-1244	176	40.165	10	65
32	2018-01-01-12.08.56 ZS PMax-adult-1-black-2.jpg:0008-0792	192	33.281	8	61
33	2018-01-01-12.08.56 ZS PMax-adult-1-black-2.jpg:0009-0526	124	14.798	4	33
34	2018-01-01-12.08.56 ZS PMax-adult-1-black-2.jpg:0010-0431	146	18.274	5	39
35	2018-01-01-12.08.56 ZS PMax-adult-1-black-2.jpg:0011-0328	166	5.934	0	25
36	2018-01-01-12.08.56 ZS PMax-adult-1-black-2.jpg:0012-0229	84	4.143	0	12		30.8084
adult-1-4
37	2018-01-01-12.08.56 ZS PMax-adult-1-black-3.jpg:0001-0497	60	46.033	4	78
38	2018-01-01-12.08.56 ZS PMax-adult-1-black-3.jpg:0002-0551	60	21	10	39
39	2018-01-01-12.08.56 ZS PMax-adult-1-black-3.jpg:0003-0598	36	65.806	36	83
40	2018-01-01-12.08.56 ZS PMax-adult-1-black-3.jpg:0004-0661	60	67.233	17	94
41	2018-01-01-12.08.56 ZS PMax-adult-1-black-3.jpg:0005-0835	69	57.217	15	76
42	2018-01-01-12.08.56 ZS PMax-adult-1-black-3.jpg:0006-1105	112	41.455	4	63
43	2018-01-01-12.08.56 ZS PMax-adult-1-black-3.jpg:0007-1494	137	33.445	4	53
44	2018-01-01-12.08.56 ZS PMax-adult-1-black-3.jpg:0008-2201	124	30.129	1	54
45	2018-01-01-12.08.56 ZS PMax-adult-1-black-3.jpg:0009-2562	166	16.705	1	43
46	2018-01-01-12.08.56 ZS PMax-adult-1-black-3.jpg:0010-2796	137	17.642	1	44
47	2018-01-01-12.08.56 ZS PMax-adult-1-black-3.jpg:0011-3019	176	0.131	0	2
48	2018-01-01-12.08.56 ZS PMax-adult-1-black-3.jpg:0012-3230	124	0.081	0	2		33.0731
	Label	Area	Mean	Min	Max
0h-2-1
1	2017-12-14-23.07.52 ZS PMax-0h-black-1.jpg:0001-1235	34	128.265	122	133
2	2017-12-14-23.07.52 ZS PMax-0h-black-1.jpg:0002-1222	32	131.781	126	137
3	2017-12-14-23.07.52 ZS PMax-0h-black-1.jpg:0003-1247	31	125.161	114	132
4	2017-12-14-23.07.52 ZS PMax-0h-black-1.jpg:0004-1203	34	138.588	131	144
5	2017-12-14-23.07.52 ZS PMax-0h-black-1.jpg:0005-0686	32	159.75	153	163
6	2017-12-14-23.07.52 ZS PMax-0h-black-1.jpg:0006-0770	52	155.923	134	168
7	2017-12-14-23.07.52 ZS PMax-0h-black-1.jpg:0007-0556	69	178.072	166	184
8	2017-12-14-23.07.52 ZS PMax-0h-black-1.jpg:0008-1059	60	144.217	139	152
9	2017-12-14-23.07.52 ZS PMax-0h-black-1.jpg:0009-0100	37	173.486	168	179
10	2017-12-14-23.07.52 ZS PMax-0h-black-1.jpg:0010-0136	16	158.625	150	163
11	2017-12-14-23.07.52 ZS PMax-0h-black-1.jpg:0011-0200	21	166.905	153	174
12	2017-12-14-23.07.52 ZS PMax-0h-black-1.jpg:0012-0240	31	158.323	148	164		151.591
0h-2-2
13	2017-12-14-23.07.52 ZS PMax-0h-black-1.jpg:0001-1711	26	132.385	124	138
14	2017-12-14-23.07.52 ZS PMax-0h-black-1.jpg:0002-1752	26	101.115	95	113
15	2017-12-14-23.07.52 ZS PMax-0h-black-1.jpg:0003-1596	21	150.238	137	157
16	2017-12-14-23.07.52 ZS PMax-0h-black-1.jpg:0004-1570	16	143.312	139	149
17	2017-12-14-23.07.52 ZS PMax-0h-black-1.jpg:0005-1322	60	168.133	162	172
18	2017-12-14-23.07.52 ZS PMax-0h-black-1.jpg:0006-1232	52	167.904	163	174
19	2017-12-14-23.07.52 ZS PMax-0h-black-1.jpg:0007-1092	34	163.588	152	170
20	2017-12-14-23.07.52 ZS PMax-0h-black-1.jpg:0008-1165	52	173.173	167	178
21	2017-12-14-23.07.52 ZS PMax-0h-black-1.jpg:0009-0740	52	172.365	167	177
22	2017-12-14-23.07.52 ZS PMax-0h-black-1.jpg:0010-0674	52	167.846	158	174
23	2017-12-14-23.07.52 ZS PMax-0h-black-1.jpg:0011-0643	69	162.348	143	173
24	2017-12-14-23.07.52 ZS PMax-0h-black-1.jpg:0012-0591	60	172.233	163	178		156.22
0h-2-3
25	2017-12-14-23.09.26 ZS PMax-0h-black-2.jpg:0001-1045	52	155.404	145	165
26	2017-12-14-23.09.26 ZS PMax-0h-black-2.jpg:0002-1035	52	151.846	146	157
27	2017-12-14-23.09.26 ZS PMax-0h-black-2.jpg:0003-1052	80	156.125	143	160
28	2017-12-14-23.09.26 ZS PMax-0h-black-2.jpg:0004-1059	60	151	144	156
29	2017-12-14-23.09.26 ZS PMax-0h-black-2.jpg:0005-1078	177	161.446	135	167
30	2017-12-14-23.09.26 ZS PMax-0h-black-2.jpg:0006-1101	166	168.301	159	178
31	2017-12-14-23.09.26 ZS PMax-0h-black-2.jpg:0007-1106	136	170.765	159	178
32	2017-12-14-23.09.26 ZS PMax-0h-black-2.jpg:0008-1122	44	174.477	165	181
33	2017-12-14-23.09.26 ZS PMax-0h-black-2.jpg:0009-1116	44	179.432	175	181
34	2017-12-14-23.09.26 ZS PMax-0h-black-2.jpg:0010-1117	52	169.923	164	174
35	2017-12-14-23.09.26 ZS PMax-0h-black-2.jpg:0011-1119	32	154.438	150	159
36	2017-12-14-23.09.26 ZS PMax-0h-black-2.jpg:0012-1109	34	157.618	140	170		162.565
0h-2-4
37	2017-12-14-23.09.26 ZS PMax-0h-black-2.jpg:0001-1160	60	128.383	118	141
38	2017-12-14-23.09.26 ZS PMax-0h-black-2.jpg:0002-1152	52	138.673	133	143
39	2017-12-14-23.09.26 ZS PMax-0h-black-2.jpg:0003-1167	32	118.656	114	123
40	2017-12-14-23.09.26 ZS PMax-0h-black-2.jpg:0004-1147	44	138.273	110	152
41	2017-12-14-23.09.26 ZS PMax-0h-black-2.jpg:0005-1125	70	142.714	125	148
42	2017-12-14-23.09.26 ZS PMax-0h-black-2.jpg:0006-1094	51	150.882	132	160
43	2017-12-14-23.09.26 ZS PMax-0h-black-2.jpg:0007-1048	52	154.846	149	160
44	2017-12-14-23.09.26 ZS PMax-0h-black-2.jpg:0008-1041	37	170.324	167	174
45	2017-12-14-23.09.26 ZS PMax-0h-black-2.jpg:0009-0960	21	168.238	161	173
46	2017-12-14-23.09.26 ZS PMax-0h-black-2.jpg:0010-0946	16	168.688	154	173
47	2017-12-14-23.09.26 ZS PMax-0h-black-2.jpg:0011-0938	21	165.667	156	172
48	2017-12-14-23.09.26 ZS PMax-0h-black-2.jpg:0012-0908	21	154	146	161		149.945
	Label	Area	Mean	Min	Max
4h-2-1
1	2017-12-15-00.32.44 ZS PMax-4h-black-1.jpg:0001-1160	60	184.8	181	187
2	2017-12-15-00.32.44 ZS PMax-4h-black-1.jpg:0002-1152	52	185.096	183	188
3	2017-12-15-00.32.44 ZS PMax-4h-black-1.jpg:0003-1167	32	185.031	183	188
4	2017-12-15-00.32.44 ZS PMax-4h-black-1.jpg:0004-1147	44	184.455	182	189
5	2017-12-15-00.32.44 ZS PMax-4h-black-1.jpg:0005-1125	70	185.957	184	188
6	2017-12-15-00.32.44 ZS PMax-4h-black-1.jpg:0006-1094	51	189.137	187	192
7	2017-12-15-00.32.44 ZS PMax-4h-black-1.jpg:0007-1048	52	153.231	141	164
8	2017-12-15-00.32.44 ZS PMax-4h-black-1.jpg:0008-1041	37	184.324	182	187
9	2017-12-15-00.32.44 ZS PMax-4h-black-1.jpg:0009-0960	21	186.286	184	190
10	2017-12-15-00.32.44 ZS PMax-4h-black-1.jpg:0010-0946	16	185.625	185	187
11	2017-12-15-00.32.44 ZS PMax-4h-black-1.jpg:0011-0938	21	185.333	183	188
12	2017-12-15-00.32.44 ZS PMax-4h-black-1.jpg:0012-0908	21	185.81	184	190		182.924
4h-2-2
13	2017-12-21-21.12.22 ZS PMax-4h-black-2.jpg:0001-1793	26	118.269	113	125
14	2017-12-21-21.12.22 ZS PMax-4h-black-2.jpg:0002-1775	34	134.706	130	141
15	2017-12-21-21.12.22 ZS PMax-4h-black-2.jpg:0003-1763	44	136.341	133	141
16	2017-12-21-21.12.22 ZS PMax-4h-black-2.jpg:0004-1753	34	128.147	112	137
17	2017-12-21-21.12.22 ZS PMax-4h-black-2.jpg:0005-1692	52	137.385	127	148
18	2017-12-21-21.12.22 ZS PMax-4h-black-2.jpg:0006-1602	69	149.797	145	154
19	2017-12-21-21.12.22 ZS PMax-4h-black-2.jpg:0007-1517	80	153.838	147	160
20	2017-12-21-21.12.22 ZS PMax-4h-black-2.jpg:0008-1450	37	170.027	164	173
21	2017-12-21-21.12.22 ZS PMax-4h-black-2.jpg:0009-1399	60	171.433	155	178
22	2017-12-21-21.12.22 ZS PMax-4h-black-2.jpg:0010-1373	60	180.083	164	187
23	2017-12-21-21.12.22 ZS PMax-4h-black-2.jpg:0011-1346	60	165.383	141	175
24	2017-12-21-21.12.22 ZS PMax-4h-black-2.jpg:0012-1315	34	160.824	153	170		150.519
4h-2-3
25	2017-12-21-21.12.22 ZS PMax-4h-black-2.jpg:0001-1689	96	108.958	102	119
26	2017-12-21-21.12.22 ZS PMax-4h-black-2.jpg:0002-1717	84	106.238	97	132
27	2017-12-21-21.12.22 ZS PMax-4h-black-2.jpg:0003-1605	70	113.286	105	122
28	2017-12-21-21.12.22 ZS PMax-4h-black-2.jpg:0004-1650	79	102.519	94	109
29	2017-12-21-21.12.22 ZS PMax-4h-black-2.jpg:0005-1461	146	114.226	106	122
30	2017-12-21-21.12.22 ZS PMax-4h-black-2.jpg:0006-1194	112	108.464	87	122
31	2017-12-21-21.12.22 ZS PMax-4h-black-2.jpg:0007-1063	86	116.651	108	124
32	2017-12-21-21.12.22 ZS PMax-4h-black-2.jpg:0008-0863	70	146.957	134	152
33	2017-12-21-21.12.22 ZS PMax-4h-black-2.jpg:0009-0590	52	165.231	146	174
34	2017-12-21-21.12.22 ZS PMax-4h-black-2.jpg:0010-0473	34	157.971	124	174
35	2017-12-21-21.12.22 ZS PMax-4h-black-2.jpg:0011-0360	60	166	154	173
36	2017-12-21-21.12.22 ZS PMax-4h-black-2.jpg:0012-0309	44	151.932	132	162		129.869
4h-2-4
37	2017-12-21-21.12.22 ZS PMax-4h-black-2.jpg:0001-2506	34	94.941	88	110
38	2017-12-21-21.12.22 ZS PMax-4h-black-2.jpg:0002-2480	44	98	88	112
39	2017-12-21-21.12.22 ZS PMax-4h-black-2.jpg:0003-2457	37	103.676	96	112
40	2017-12-21-21.12.22 ZS PMax-4h-black-2.jpg:0004-2435	52	108.096	102	116
41	2017-12-21-21.12.22 ZS PMax-4h-black-2.jpg:0005-2103	84	174.298	161	182
42	2017-12-21-21.12.22 ZS PMax-4h-black-2.jpg:0006-2121	156	166.295	158	174
43	2017-12-21-21.12.22 ZS PMax-4h-black-2.jpg:0007-2221	70	108.843	103	114
44	2017-12-21-21.12.22 ZS PMax-4h-black-2.jpg:0008-2319	86	110.756	99	120
45	2017-12-21-21.12.22 ZS PMax-4h-black-2.jpg:0009-2101	124	173.556	164	180
46	2017-12-21-21.12.22 ZS PMax-4h-black-2.jpg:0010-2139	97	170.629	158	180
47	2017-12-21-21.12.22 ZS PMax-4h-black-2.jpg:0011-2145	70	167.743	149	175
48	2017-12-21-21.12.22 ZS PMax-4h-black-2.jpg:0012-2162	60	162.6	155	171		136.619
8h-2-1	Label	Area	Mean	Min	Max
1	2017-12-21-21.21.03 ZS PMax-8h-black-2.jpg:0001-0180	32	109.156	104	117
2	2017-12-21-21.21.03 ZS PMax-8h-black-2.jpg:0002-0223	34	109.265	97	121
3	2017-12-21-21.21.03 ZS PMax-8h-black-2.jpg:0003-0137	26	111	107	116
4	2017-12-21-21.21.03 ZS PMax-8h-black-2.jpg:0004-0260	44	117.182	106	137
5	2017-12-21-21.21.03 ZS PMax-8h-black-2.jpg:0005-0556	70	111.786	107	116
6	2017-12-21-21.21.03 ZS PMax-8h-black-2.jpg:0006-0791	70	108.757	101	114
7	2017-12-21-21.21.03 ZS PMax-8h-black-2.jpg:0007-1199	69	123.652	113	130
8	2017-12-21-21.21.03 ZS PMax-8h-black-2.jpg:0008-1541	60	140.583	133	145
9	2017-12-21-21.21.03 ZS PMax-8h-black-2.jpg:0009-1922	60	143.3	131	149
10	2017-12-21-21.21.03 ZS PMax-8h-black-2.jpg:0010-2072	60	155.667	141	163
11	2017-12-21-21.21.03 ZS PMax-8h-black-2.jpg:0011-2233	44	150.682	131	157
12	2017-12-21-21.21.03 ZS PMax-8h-black-2.jpg:0012-2448	37	144.27	133	150		127.108
	Label	Area	Mean	Min	Max
12h-2-1
1	2017-12-21-21.38.57 ZS PMax-12h-black-1.jpg:0001-1089	31	106.806	103	114
2	2017-12-21-21.38.57 ZS PMax-12h-black-1.jpg:0002-1130	79	102.481	90	111
3	2017-12-21-21.38.57 ZS PMax-12h-black-1.jpg:0003-1167	70	105.971	101	111
4	2017-12-21-21.38.57 ZS PMax-12h-black-1.jpg:0004-1195	86	106.744	96	114
5	2017-12-21-21.38.57 ZS PMax-12h-black-1.jpg:0005-1444	80	110.55	95	121
6	2017-12-21-21.38.57 ZS PMax-12h-black-1.jpg:0006-1685	216	108.389	98	117
7	2017-12-21-21.38.57 ZS PMax-12h-black-1.jpg:0007-1955	166	101.277	94	111
8	2017-12-21-21.38.57 ZS PMax-12h-black-1.jpg:0008-2670	192	118.734	99	131
9	2017-12-21-21.38.57 ZS PMax-12h-black-1.jpg:0009-2973	70	151.714	143	157
10	2017-12-21-21.38.57 ZS PMax-12h-black-1.jpg:0010-3064	69	157.449	148	164
11	2017-12-21-21.38.57 ZS PMax-12h-black-1.jpg:0011-3201	70	154.243	146	159
12	2017-12-21-21.38.57 ZS PMax-12h-black-1.jpg:0012-3349	70	165.771	152	171		124.177
12h-2-2
13	2017-12-21-21.38.57 ZS PMax-12h-black-1.jpg:0001-0444	60	109.417	102	115
14	2017-12-21-21.38.57 ZS PMax-12h-black-1.jpg:0002-0489	60	123.367	118	131
15	2017-12-21-21.38.57 ZS PMax-12h-black-1.jpg:0003-0400	32	99.75	94	105
16	2017-12-21-21.38.57 ZS PMax-12h-black-1.jpg:0004-0527	79	111.937	104	121
17	2017-12-21-21.38.57 ZS PMax-12h-black-1.jpg:0005-0950	86	107.849	102	115
18	2017-12-21-21.38.57 ZS PMax-12h-black-1.jpg:0006-1563	86	92.093	82	98
19	2017-12-21-21.38.57 ZS PMax-12h-black-1.jpg:0007-1769	166	98.608	95	104
20	2017-12-21-21.38.57 ZS PMax-12h-black-1.jpg:0008-2140	166	121.054	115	128
21	2017-12-21-21.38.57 ZS PMax-12h-black-1.jpg:0009-2425	104	98.673	88	107
22	2017-12-21-21.38.57 ZS PMax-12h-black-1.jpg:0010-2583	69	111.667	103	127
23	2017-12-21-21.38.57 ZS PMax-12h-black-1.jpg:0011-2784	64	126.422	114	134
24	2017-12-21-21.38.57 ZS PMax-12h-black-1.jpg:0012-2923	52	127.404	122	134		110.687
12h-2-3
25	2017-12-21-21.38.57 ZS PMax-12h-black-2.jpg:0001-3453	37	110.216	107	117
26	2017-12-21-21.38.57 ZS PMax-12h-black-2.jpg:0002-3421	32	116.562	114	120
27	2017-12-21-21.38.57 ZS PMax-12h-black-2.jpg:0003-3487	32	103.844	100	111
28	2017-12-21-21.38.57 ZS PMax-12h-black-2.jpg:0004-3383	21	113.286	111	117
29	2017-12-21-21.38.57 ZS PMax-12h-black-2.jpg:0005-3149	84	119.143	110	128
30	2017-12-21-21.38.57 ZS PMax-12h-black-2.jpg:0006-2798	156	110.737	106	121
31	2017-12-21-21.38.57 ZS PMax-12h-black-2.jpg:0007-2065	166	106.175	95	121
32	2017-12-21-21.38.57 ZS PMax-12h-black-2.jpg:0008-1702	112	127.571	110	143
33	2017-12-21-21.38.57 ZS PMax-12h-black-2.jpg:0009-1578	52	139.962	129	147
34	2017-12-21-21.38.57 ZS PMax-12h-black-2.jpg:0010-1375	52	152.135	144	155
35	2017-12-21-21.38.57 ZS PMax-12h-black-2.jpg:0011-1207	44	169.545	161	176
36	2017-12-21-21.38.57 ZS PMax-12h-black-2.jpg:0012-1085	26	153.5	136	160		126.89
12h-2-4
37	2017-12-21-21.38.57 ZS PMax-12h-black-2.jpg:0001-1013	166	134.295	123	155
38	2017-12-21-21.38.57 ZS PMax-12h-black-2.jpg:0002-1136	102	132.206	126	138
39	2017-12-21-21.38.57 ZS PMax-12h-black-2.jpg:0003-1080	104	132.654	123	142
40	2017-12-21-21.38.57 ZS PMax-12h-black-2.jpg:0004-1202	140	131.729	124	138
41	2017-12-21-21.38.57 ZS PMax-12h-black-2.jpg:0005-1437	112	119.098	113	129
42	2017-12-21-21.38.57 ZS PMax-12h-black-2.jpg:0006-1608	224	118.241	111	131
43	2017-12-21-21.38.57 ZS PMax-12h-black-2.jpg:0007-1794	176	117.108	102	129
44	2017-12-21-21.38.57 ZS PMax-12h-black-2.jpg:0008-1908	208	110.361	99	124
45	2017-12-21-21.38.57 ZS PMax-12h-black-2.jpg:0009-2013	80	142.375	131	151
46	2017-12-21-21.38.57 ZS PMax-12h-black-2.jpg:0010-2076	86	136.209	126	147
47	2017-12-21-21.38.57 ZS PMax-12h-black-2.jpg:0011-2160	52	159.942	148	166
48	2017-12-21-21.38.57 ZS PMax-12h-black-2.jpg:0012-2186	21	145.19	139	149		131.617
	Label	Area	Mean	Min	Max
16h-2-1
1	2018-01-02-20.41.10 ZS PMax-16h-black-1.jpg:0001-0970	80	122.713	114	139
2	2018-01-02-20.41.10 ZS PMax-16h-black-1.jpg:0002-1049	69	130.391	123	136
3	2018-01-02-20.41.10 ZS PMax-16h-black-1.jpg:0003-1112	69	112.464	102	123
4	2018-01-02-20.41.10 ZS PMax-16h-black-1.jpg:0004-1188	64	125.406	120	136
5	2018-01-02-20.41.10 ZS PMax-16h-black-1.jpg:0005-1424	115	108.539	101	114
6	2018-01-02-20.41.10 ZS PMax-16h-black-1.jpg:0006-1625	104	107.808	102	115
7	2018-01-02-20.41.10 ZS PMax-16h-black-1.jpg:0007-1924	126	94.198	89	99
8	2018-01-02-20.41.10 ZS PMax-16h-black-1.jpg:0008-2186	136	103.507	98	111
9	2018-01-02-20.41.10 ZS PMax-16h-black-1.jpg:0009-2395	96	101.417	96	106
10	2018-01-02-20.41.10 ZS PMax-16h-black-1.jpg:0010-2462	102	104.882	95	115
11	2018-01-02-20.41.10 ZS PMax-16h-black-1.jpg:0011-2572	104	108.106	94	119
12	2018-01-02-20.41.10 ZS PMax-16h-black-1.jpg:0012-2646	60	126.183	105	142		112.135
16h-2-2
13	2018-01-02-20.41.10 ZS PMax-16h-black-1.jpg:0001-1231	60	112.6	104	121
14	2018-01-02-20.41.10 ZS PMax-16h-black-1.jpg:0002-1276	44	113.432	106	120
15	2018-01-02-20.41.10 ZS PMax-16h-black-1.jpg:0003-1324	60	114.583	101	128
16	2018-01-02-20.41.10 ZS PMax-16h-black-1.jpg:0004-1379	70	113.043	101	120
17	2018-01-02-20.41.10 ZS PMax-16h-black-1.jpg:0005-1573	70	100.929	92	110
18	2018-01-02-20.41.10 ZS PMax-16h-black-1.jpg:0006-1837	124	93.798	84	105
19	2018-01-02-20.41.10 ZS PMax-16h-black-1.jpg:0007-2047	80	84.675	79	91
20	2018-01-02-20.41.10 ZS PMax-16h-black-1.jpg:0008-2319	115	105.435	100	112
21	2018-01-02-20.41.10 ZS PMax-16h-black-1.jpg:0009-2577	80	118.638	109	126
22	2018-01-02-20.41.10 ZS PMax-16h-black-1.jpg:0010-2650	70	125.1	115	135
23	2018-01-02-20.41.10 ZS PMax-16h-black-1.jpg:0011-2533	60	119.833	112	127
24	2018-01-02-20.41.10 ZS PMax-16h-black-1.jpg:0012-2701	69	130.319	117	140		111.032
16h-2-3
25	2018-01-02-20.41.10 ZS PMax-16h-black-2.jpg:0001-0998	61	120.754	117	128
26	2018-01-02-20.41.10 ZS PMax-16h-black-2.jpg:0002-1066	60	127.233	118	135
27	2018-01-02-20.41.10 ZS PMax-16h-black-2.jpg:0003-1129	79	112.089	100	128
28	2018-01-02-20.41.10 ZS PMax-16h-black-2.jpg:0004-1193	86	118.163	114	127
29	2018-01-02-20.41.10 ZS PMax-16h-black-2.jpg:0005-1332	146	118.205	109	134
30	2018-01-02-20.41.10 ZS PMax-16h-black-2.jpg:0006-1593	190	108.737	91	120
31	2018-01-02-20.41.10 ZS PMax-16h-black-2.jpg:0007-1831	102	101.814	96	109
32	2018-01-02-20.41.10 ZS PMax-16h-black-2.jpg:0008-2148	112	104.179	93	115
33	2018-01-02-20.41.10 ZS PMax-16h-black-2.jpg:0009-2504	86	128.058	120	133
34	2018-01-02-20.41.10 ZS PMax-16h-black-2.jpg:0010-2696	86	135.477	126	144
35	2018-01-02-20.41.10 ZS PMax-16h-black-2.jpg:0011-2793	36	122.472	114	136
36	2018-01-02-20.41.10 ZS PMax-16h-black-2.jpg:0012-2911	34	143.529	132	153		120.059
	Label	Area	Mean	Min	Max
20h-2-1
1	2018-01-02-21.31.10 ZS PMax-20-black-1.jpg:0001-1442	34	115.324	108	125
2	2018-01-02-21.31.10 ZS PMax-20-black-1.jpg:0002-1434	36	117.194	111	123
3	2018-01-02-21.31.10 ZS PMax-20-black-1.jpg:0003-1427	37	114.297	107	119
4	2018-01-02-21.31.10 ZS PMax-20-black-1.jpg:0004-1416	64	110.172	103	117
5	2018-01-02-21.31.10 ZS PMax-20-black-1.jpg:0005-1375	86	109.616	105	114
6	2018-01-02-21.31.10 ZS PMax-20-black-1.jpg:0006-1311	156	110.949	101	124
7	2018-01-02-21.31.10 ZS PMax-20-black-1.jpg:0007-1236	115	108.217	99	116
8	2018-01-02-21.31.10 ZS PMax-20-black-1.jpg:0008-1141	136	103.757	95	110
9	2018-01-02-21.31.10 ZS PMax-20-black-1.jpg:0009-1089	146	100.788	87	116
10	2018-01-02-21.31.10 ZS PMax-20-black-1.jpg:0010-1043	97	100.887	96	107
11	2018-01-02-21.31.10 ZS PMax-20-black-1.jpg:0011-1004	60	98.583	90	105
12	2018-01-02-21.31.10 ZS PMax-20-black-1.jpg:0012-0974	26	88.115	82	96		106.492
20h-2-2
13	2018-01-02-21.31.10 ZS PMax-20-black-1.jpg:0001-2166	70	117.829	111	126
14	2018-01-02-21.31.10 ZS PMax-20-black-1.jpg:0002-2100	58	110.759	105	117
15	2018-01-02-21.31.10 ZS PMax-20-black-1.jpg:0003-2040	60	114.983	109	120
16	2018-01-02-21.31.10 ZS PMax-20-black-1.jpg:0004-2199	44	99.795	94	109
17	2018-01-02-21.31.10 ZS PMax-20-black-1.jpg:0005-1943	104	111.702	106	116
18	2018-01-02-21.31.10 ZS PMax-20-black-1.jpg:0006-1766	104	103.615	98	113
19	2018-01-02-21.31.10 ZS PMax-20-black-1.jpg:0007-1588	44	101.25	93	112
20	2018-01-02-21.31.10 ZS PMax-20-black-1.jpg:0008-1342	80	109.287	100	118
21	2018-01-02-21.31.10 ZS PMax-20-black-1.jpg:0009-1225	70	98.957	93	108
22	2018-01-02-21.31.10 ZS PMax-20-black-1.jpg:0010-1147	44	100.886	93	111
23	2018-01-02-21.31.10 ZS PMax-20-black-1.jpg:0011-1091	37	98.054	91	104
24	2018-01-02-21.31.10 ZS PMax-20-black-1.jpg:0012-0974	52	113.192	108	118		106.692
20h-2-3
25	2018-01-02-21.31.10 ZS PMax-20-black-2.jpg:0001-2711	102	97.941	86	115
26	2018-01-02-21.31.10 ZS PMax-20-black-2.jpg:0002-2600	80	97.513	92	105
27	2018-01-02-21.31.10 ZS PMax-20-black-2.jpg:0003-2466	70	103.157	92	110
28	2018-01-02-21.31.10 ZS PMax-20-black-2.jpg:0004-2788	80	102.162	94	109
29	2018-01-02-21.31.10 ZS PMax-20-black-2.jpg:0005-2311	208	103.115	92	142
30	2018-01-02-21.31.10 ZS PMax-20-black-2.jpg:0006-2106	177	98.893	89	111
31	2018-01-02-21.31.10 ZS PMax-20-black-2.jpg:0007-1808	79	88.291	82	98
32	2018-01-02-21.31.10 ZS PMax-20-black-2.jpg:0008-1488	208	89.822	79	117
33	2018-01-02-21.31.10 ZS PMax-20-black-2.jpg:0009-1306	115	90.183	75	105
34	2018-01-02-21.31.10 ZS PMax-20-black-2.jpg:0010-1095	115	91.052	82	110
35	2018-01-02-21.31.10 ZS PMax-20-black-2.jpg:0011-0941	104	109.942	99	120
36	2018-01-02-21.31.10 ZS PMax-20-black-2.jpg:0012-0767	104	112.596	100	128		98.7223
20h-2-4
37	2018-01-02-21.31.10 ZS PMax-20-black-2.jpg:0001-3911	70	81.614	75	88
38	2018-01-02-21.31.10 ZS PMax-20-black-2.jpg:0002-3981	72	81.431	74	89
39	2018-01-02-21.31.10 ZS PMax-20-black-2.jpg:0003-3850	58	75.741	71	84
40	2018-01-02-21.31.10 ZS PMax-20-black-2.jpg:0004-4041	34	86.029	81	90
41	2018-01-02-21.31.10 ZS PMax-20-black-2.jpg:0005-3627	104	73.49	67	79
42	2018-01-02-21.31.10 ZS PMax-20-black-2.jpg:0006-3323	104	83.587	76	95
43	2018-01-02-21.31.10 ZS PMax-20-black-2.jpg:0007-3081	70	83.557	79	91
44	2018-01-02-21.31.10 ZS PMax-20-black-2.jpg:0008-2718	86	79.895	73	85
45	2018-01-02-21.31.10 ZS PMax-20-black-2.jpg:0009-2491	86	86.5	82	91
46	2018-01-02-21.31.10 ZS PMax-20-black-2.jpg:0010-2355	60	93.617	89	100
47	2018-01-02-21.31.10 ZS PMax-20-black-2.jpg:0011-2250	80	96.525	90	110
48	2018-01-02-21.31.10 ZS PMax-20-black-2.jpg:0012-2201	86	85.802	78	95		83.9823
	Label	Area	Mean	Min	Max
24h-2-1
1	2018-01-03-09.41.54 ZS PMax-24h-black-1.jpg:0001-1440	37	93.622	88	104
2	2018-01-03-09.41.54 ZS PMax-24h-black-1.jpg:0002-1460	37	97.054	91	103
3	2018-01-03-09.41.54 ZS PMax-24h-black-1.jpg:0003-1479	37	91.297	87	100
4	2018-01-03-09.41.54 ZS PMax-24h-black-1.jpg:0004-1493	32	90.25	86	97
5	2018-01-03-09.41.54 ZS PMax-24h-black-1.jpg:0005-1567	80	88.562	80	113
6	2018-01-03-09.41.54 ZS PMax-24h-black-1.jpg:0006-1753	96	78.354	70	103
7	2018-01-03-09.41.54 ZS PMax-24h-black-1.jpg:0007-1987	136	92.838	79	131
8	2018-01-03-09.41.54 ZS PMax-24h-black-1.jpg:0008-2189	146	83.486	70	117
9	2018-01-03-09.41.54 ZS PMax-24h-black-1.jpg:0009-2418	97	81.01	69	92
10	2018-01-03-09.41.54 ZS PMax-24h-black-1.jpg:0010-2490	79	92.203	86	107
11	2018-01-03-09.41.54 ZS PMax-24h-black-1.jpg:0011-2638	80	80.213	71	94
12	2018-01-03-09.41.54 ZS PMax-24h-black-1.jpg:0012-2783	86	83.174	76	90		87.6719
24h-2-2
13	2018-01-03-09.41.54 ZS PMax-24h-black-1.jpg:0013-1769	44	103.455	93	125
14	2018-01-03-09.41.54 ZS PMax-24h-black-1.jpg:0014-1748	44	105.364	94	126
15	2018-01-03-09.41.54 ZS PMax-24h-black-1.jpg:0015-1718	44	92.159	84	101
16	2018-01-03-09.41.54 ZS PMax-24h-black-1.jpg:0016-1696	70	102.343	90	113
17	2018-01-03-09.41.54 ZS PMax-24h-black-1.jpg:0017-1638	104	95.721	87	111
18	2018-01-03-09.41.54 ZS PMax-24h-black-1.jpg:0018-1519	80	90.412	82	100
19	2018-01-03-09.41.54 ZS PMax-24h-black-1.jpg:0019-1435	112	86.402	80	100
20	2018-01-03-09.41.54 ZS PMax-24h-black-1.jpg:0020-1407	80	86.75	75	96
21	2018-01-03-09.41.54 ZS PMax-24h-black-1.jpg:0021-1293	60	92.467	73	103
22	2018-01-03-09.41.54 ZS PMax-24h-black-1.jpg:0022-1267	60	91	82	102
23	2018-01-03-09.41.54 ZS PMax-24h-black-1.jpg:0023-1246	80	94.838	82	110
24	2018-01-03-09.41.54 ZS PMax-24h-black-1.jpg:0024-1218	69	94.232	85	111		94.5953
24h-2-3
25	2018-01-03-09.41.54 ZS PMax-24h-black-1.jpg:0025-1198	34	116.529	112	121
26	2018-01-03-09.41.54 ZS PMax-24h-black-1.jpg:0026-1226	44	109.432	100	126
27	2018-01-03-09.41.54 ZS PMax-24h-black-1.jpg:0027-1170	44	90.977	84	106
28	2018-01-03-09.41.54 ZS PMax-24h-black-1.jpg:0028-1143	60	95.683	88	107
29	2018-01-03-09.41.54 ZS PMax-24h-black-1.jpg:0029-1017	79	94.633	89	105
30	2018-01-03-09.41.54 ZS PMax-24h-black-1.jpg:0030-0893	96	80.698	74	95
31	2018-01-03-09.41.54 ZS PMax-24h-black-1.jpg:0031-0769	115	83.478	70	102
32	2018-01-03-09.41.54 ZS PMax-24h-black-1.jpg:0032-0655	80	99.963	87	127
33	2018-01-03-09.41.54 ZS PMax-24h-black-1.jpg:0033-0525	52	78.673	69	84
34	2018-01-03-09.41.54 ZS PMax-24h-black-1.jpg:0034-0470	60	108.333	99	116
35	2018-01-03-09.41.54 ZS PMax-24h-black-1.jpg:0035-0431	52	117.788	113	122
36	2018-01-03-09.41.54 ZS PMax-24h-black-1.jpg:0036-0409	69	101.478	87	117		98.1388
24h-2-4
37	2018-01-03-09.41.54 ZS PMax-24h-black-1.jpg:0037-0343	34	71.588	60	92
38	2018-01-03-09.41.54 ZS PMax-24h-black-1.jpg:0038-0394	52	75.192	67	93
39	2018-01-03-09.41.54 ZS PMax-24h-black-1.jpg:0039-0440	69	85.768	79	93
40	2018-01-03-09.41.54 ZS PMax-24h-black-1.jpg:0040-0315	32	69.812	64	86
41	2018-01-03-09.41.54 ZS PMax-24h-black-1.jpg:0041-0612	86	93.221	81	101
42	2018-01-03-09.41.54 ZS PMax-24h-black-1.jpg:0042-0952	80	81.55	72	97
43	2018-01-03-09.41.54 ZS PMax-24h-black-1.jpg:0043-1336	156	81.558	72	95
44	2018-01-03-09.41.54 ZS PMax-24h-black-1.jpg:0044-1696	146	84.925	67	96
45	2018-01-03-09.41.54 ZS PMax-24h-black-1.jpg:0045-1894	60	116.783	99	125
46	2018-01-03-09.41.54 ZS PMax-24h-black-1.jpg:0046-2019	96	100.594	89	112
47	2018-01-03-09.41.54 ZS PMax-24h-black-1.jpg:0047-2099	51	106.549	95	119
48	2018-01-03-09.41.54 ZS PMax-24h-black-1.jpg:0048-2150	69	106.043	94	136		89.4653
	Label	Area	Mean	Min	Max
adult-rep2-1
1	2018-01-03-09.46.50 ZS PMax-adult-black-1.jpg:0001-3983	148	60.122	50	81
2	2018-01-03-09.46.50 ZS PMax-adult-black-1.jpg:0002-3897	104	57.971	49	92
3	2018-01-03-09.46.50 ZS PMax-adult-black-1.jpg:0003-4075	126	61.984	51	79
4	2018-01-03-09.46.50 ZS PMax-adult-black-1.jpg:0004-3809	79	52.671	47	58
5	2018-01-03-09.46.50 ZS PMax-adult-black-1.jpg:0005-3479	140	55.979	49	64
6	2018-01-03-09.46.50 ZS PMax-adult-black-1.jpg:0006-2986	137	58.387	51	66
7	2018-01-03-09.46.50 ZS PMax-adult-black-1.jpg:0007-2373	274	61.858	53	88
8	2018-01-03-09.46.50 ZS PMax-adult-black-1.jpg:0008-2052	216	62.505	53	89
9	2018-01-03-09.46.50 ZS PMax-adult-black-1.jpg:0009-1785	216	55.287	45	83
10	2018-01-03-09.46.50 ZS PMax-adult-black-1.jpg:0010-1457	151	57.854	53	65
11	2018-01-03-09.46.50 ZS PMax-adult-black-1.jpg:0011-1129	228	50.5	40	62
12	2018-01-03-09.46.50 ZS PMax-adult-black-1.jpg:0012-0946	156	46.981	39	63		56.8416
adult-rep2-2
13	2018-01-03-09.46.50 ZS PMax-adult-black-2.jpg:0001-3524	380	79.976	69	135
14	2018-01-03-09.46.50 ZS PMax-adult-black-2.jpg:0002-3400	224	70.924	63	80
15	2018-01-03-09.46.50 ZS PMax-adult-black-2.jpg:0003-3649	136	82.765	73	93
16	2018-01-03-09.46.50 ZS PMax-adult-black-2.jpg:0004-3247	228	72.706	61	99
17	2018-01-03-09.46.50 ZS PMax-adult-black-2.jpg:0005-3132	228	75.232	67	89
18	2018-01-03-09.46.50 ZS PMax-adult-black-2.jpg:0006-2683	281	78.915	63	97
19	2018-01-03-09.46.50 ZS PMax-adult-black-2.jpg:0007-2267	210	64.829	55	90
20	2018-01-03-09.46.50 ZS PMax-adult-black-2.jpg:0008-2919	255	80.227	73	100
21	2018-01-03-09.46.50 ZS PMax-adult-black-2.jpg:0009-2021	126	43.563	36	54
22	2018-01-03-09.46.50 ZS PMax-adult-black-2.jpg:0010-1837	126	34.627	29	43
23	2018-01-03-09.46.50 ZS PMax-adult-black-2.jpg:0011-1683	151	27.927	22	42
24	2018-01-03-09.46.50 ZS PMax-adult-black-2.jpg:0012-1567	136	26.338	14	70		61.5024
adult-rep2-3
25	2018-01-03-09.46.50 ZS PMax-adult-black-2.jpg:0013-4125	70	91.614	83	103
26	2018-01-03-09.46.50 ZS PMax-adult-black-2.jpg:0014-4032	52	90.788	80	100
27	2018-01-03-09.46.50 ZS PMax-adult-black-2.jpg:0015-4176	60	81.933	76	92
28	2018-01-03-09.46.50 ZS PMax-adult-black-2.jpg:0016-4089	70	88.386	84	95
29	2018-01-03-09.46.50 ZS PMax-adult-black-2.jpg:0017-3908	124	94.29	90	99
30	2018-01-03-09.46.50 ZS PMax-adult-black-2.jpg:0018-3761	274	89.869	79	124
31	2018-01-03-09.46.50 ZS PMax-adult-black-2.jpg:0019-3578	192	87.948	78	98
32	2018-01-03-09.46.50 ZS PMax-adult-black-2.jpg:0020-3402	176	93.159	86	102
33	2018-01-03-09.46.50 ZS PMax-adult-black-2.jpg:0021-3162	151	92.795	85	101
34	2018-01-03-09.46.50 ZS PMax-adult-black-2.jpg:0022-3027	146	101.062	93	113
35	2018-01-03-09.46.50 ZS PMax-adult-black-2.jpg:0023-2942	229	122.799	104	137
36	2018-01-03-09.46.50 ZS PMax-adult-black-2.jpg:0024-2849	70	146.771	140	152		98.4512
	Label	Area	Mean	Min	Max
0h-3-1
1	2018-01-03-09.52.38 ZS PMax-0h-black-1.jpg:0001-0357	32	102.25	96	113
2	2018-01-03-09.52.38 ZS PMax-0h-black-1.jpg:0002-0372	26	106.269	100	114
3	2018-01-03-09.52.38 ZS PMax-0h-black-1.jpg:0003-0387	44	107.341	97	117
4	2018-01-03-09.52.38 ZS PMax-0h-black-1.jpg:0004-0399	37	119.351	106	131
5	2018-01-03-09.52.38 ZS PMax-0h-black-1.jpg:0005-0434	60	123.95	117	129
6	2018-01-03-09.52.38 ZS PMax-0h-black-1.jpg:0006-0494	60	129.05	114	137
7	2018-01-03-09.52.38 ZS PMax-0h-black-1.jpg:0007-0549	104	140.788	133	146
8	2018-01-03-09.52.38 ZS PMax-0h-black-1.jpg:0008-0661	124	160.75	155	166
9	2018-01-03-09.52.38 ZS PMax-0h-black-1.jpg:0009-0707	97	145.103	135	152
10	2018-01-03-09.52.38 ZS PMax-0h-black-1.jpg:0010-0904	32	131.656	121	137
11	2018-01-03-09.52.38 ZS PMax-0h-black-1.jpg:0011-0775	44	148.795	142	154
12	2018-01-03-09.52.38 ZS PMax-0h-black-1.jpg:0012-0606	136	146.625	139	153		130.161
0h-3-2
13	2018-01-03-09.52.38 ZS PMax-0h-black-1.jpg:0013-0679	44	104.591	100	112
14	2018-01-03-09.52.38 ZS PMax-0h-black-1.jpg:0014-0719	104	102.712	90	115
15	2018-01-03-09.52.38 ZS PMax-0h-black-1.jpg:0015-0752	80	92.275	81	105
16	2018-01-03-09.52.38 ZS PMax-0h-black-1.jpg:0016-0647	52	101.135	91	121
17	2018-01-03-09.52.38 ZS PMax-0h-black-1.jpg:0017-0863	136	108.853	93	121
18	2018-01-03-09.52.38 ZS PMax-0h-black-1.jpg:0018-1004	112	119.482	103	130
19	2018-01-03-09.52.38 ZS PMax-0h-black-1.jpg:0019-1218	148	134.831	124	149
20	2018-01-03-09.52.38 ZS PMax-0h-black-1.jpg:0020-1572	216	151.292	134	162
21	2018-01-03-09.52.38 ZS PMax-0h-black-1.jpg:0021-1767	115	159.096	154	164
22	2018-01-03-09.52.38 ZS PMax-0h-black-1.jpg:0022-1698	112	155.661	148	164
23	2018-01-03-09.52.38 ZS PMax-0h-black-1.jpg:0023-2042	84	140.726	137	144
24	2018-01-03-09.52.38 ZS PMax-0h-black-1.jpg:0024-2167	115	140.157	119	149		125.901
0h-3-3
25	2018-01-03-09.52.38 ZS PMax-0h-black-2.jpg:0001-1379	44	131.432	127	134
26	2018-01-03-09.52.38 ZS PMax-0h-black-2.jpg:0002-1354	36	136.278	132	142
27	2018-01-03-09.52.38 ZS PMax-0h-black-2.jpg:0003-1406	36	116.056	110	121
28	2018-01-03-09.52.38 ZS PMax-0h-black-2.jpg:0004-1324	37	141.541	137	145
29	2018-01-03-09.52.38 ZS PMax-0h-black-2.jpg:0005-1218	60	139.217	131	145
30	2018-01-03-09.52.38 ZS PMax-0h-black-2.jpg:0006-1058	112	159.473	156	164
31	2018-01-03-09.52.38 ZS PMax-0h-black-2.jpg:0007-0839	124	169.847	164	176
32	2018-01-03-09.52.38 ZS PMax-0h-black-2.jpg:0008-0952	146	171.836	160	179
33	2018-01-03-09.52.38 ZS PMax-0h-black-2.jpg:0009-0682	136	169.147	163	178
34	2018-01-03-09.52.38 ZS PMax-0h-black-2.jpg:0010-0629	86	172.558	166	177
35	2018-01-03-09.52.38 ZS PMax-0h-black-2.jpg:0011-0589	69	165.739	160	173
36	2018-01-03-09.52.38 ZS PMax-0h-black-2.jpg:0012-0520	70	171.214	166	175		153.695
0h-3-4
37	2018-01-03-09.52.38 ZS PMax-0h-black-2.jpg:0013-0290	37	128.27	123	134
38	2018-01-03-09.52.38 ZS PMax-0h-black-2.jpg:0014-0308	44	131	121	138
39	2018-01-03-09.52.38 ZS PMax-0h-black-2.jpg:0015-0321	52	128.327	121	141
40	2018-01-03-09.52.38 ZS PMax-0h-black-2.jpg:0016-0332	60	130.967	124	139
41	2018-01-03-09.52.38 ZS PMax-0h-black-2.jpg:0017-0371	86	130.209	123	138
42	2018-01-03-09.52.38 ZS PMax-0h-black-2.jpg:0018-0503	146	146.26	141	152
43	2018-01-03-09.52.38 ZS PMax-0h-black-2.jpg:0019-0627	176	164.142	156	170
44	2018-01-03-09.52.38 ZS PMax-0h-black-2.jpg:0020-0556	112	158.723	151	166
45	2018-01-03-09.52.38 ZS PMax-0h-black-2.jpg:0021-0700	86	152.547	144	158
46	2018-01-03-09.52.38 ZS PMax-0h-black-2.jpg:0022-0756	124	148.315	132	159
47	2018-01-03-09.52.38 ZS PMax-0h-black-2.jpg:0023-0818	104	157.615	149	167
48	2018-01-03-09.52.38 ZS PMax-0h-black-2.jpg:0024-0842	60	145.7	123	155		143.506
	Label	Area	Mean	Min	Max
4h-3-1
1	2018-01-03-09.57.35 ZS PMax-4h-black-1.jpg:0001-2586	34	124.353	119	130
2	2018-01-03-09.57.35 ZS PMax-4h-black-1.jpg:0002-2503	37	133.243	126	142
3	2018-01-03-09.57.35 ZS PMax-4h-black-1.jpg:0003-2408	44	134.318	128	141
4	2018-01-03-09.57.35 ZS PMax-4h-black-1.jpg:0004-2648	32	115.406	101	126
5	2018-01-03-09.57.35 ZS PMax-4h-black-1.jpg:0005-2244	44	140.773	137	146
6	2018-01-03-09.57.35 ZS PMax-4h-black-1.jpg:0006-1936	70	158.029	150	164
7	2018-01-03-09.57.35 ZS PMax-4h-black-1.jpg:0007-1652	80	171.95	140	185
8	2018-01-03-09.57.35 ZS PMax-4h-black-1.jpg:0008-1597	97	177.381	172	182
9	2018-01-03-09.57.35 ZS PMax-4h-black-1.jpg:0009-1295	80	167.838	156	176
10	2018-01-03-09.57.35 ZS PMax-4h-black-1.jpg:0010-1353	80	176.2	169	180
11	2018-01-03-09.57.35 ZS PMax-4h-black-1.jpg:0011-1203	44	152.318	139	161
12	2018-01-03-09.57.35 ZS PMax-4h-black-1.jpg:0012-0937	86	176.302	133	186		152.343
4h-3-2
13	2018-01-03-09.57.35 ZS PMax-4h-black-1.jpg:0013-0905	96	96.594	90	117
14	2018-01-03-09.57.35 ZS PMax-4h-black-1.jpg:0014-1020	52	126.635	115	148
15	2018-01-03-09.57.35 ZS PMax-4h-black-1.jpg:0015-1094	86	117.163	107	128
16	2018-01-03-09.57.35 ZS PMax-4h-black-1.jpg:0016-1155	70	125.871	99	139
17	2018-01-03-09.57.35 ZS PMax-4h-black-1.jpg:0017-1345	86	128.081	105	143
18	2018-01-03-09.57.35 ZS PMax-4h-black-1.jpg:0018-1571	88	137.807	114	145
19	2018-01-03-09.57.35 ZS PMax-4h-black-1.jpg:0019-1799	104	132.721	120	147
20	2018-01-03-09.57.35 ZS PMax-4h-black-1.jpg:0020-2004	124	161.5	149	171
21	2018-01-03-09.57.35 ZS PMax-4h-black-1.jpg:0021-2300	136	182.625	172	188
22	2018-01-03-09.57.35 ZS PMax-4h-black-1.jpg:0022-2342	104	171.317	160	183
23	2018-01-03-09.57.35 ZS PMax-4h-black-1.jpg:0023-2375	104	177.625	158	185
24	2018-01-03-09.57.35 ZS PMax-4h-black-1.jpg:0024-2414	52	160.654	152	174		143.216
4h-3-3
25	2018-01-03-09.57.35 ZS PMax-4h-black-2.jpg:0001-0364	34	118.324	114	123
26	2018-01-03-09.57.35 ZS PMax-4h-black-2.jpg:0002-0408	44	118.068	113	125
27	2018-01-03-09.57.35 ZS PMax-4h-black-2.jpg:0003-0454	60	117.267	108	125
28	2018-01-03-09.57.35 ZS PMax-4h-black-2.jpg:0004-0515	60	117.267	114	123
29	2018-01-03-09.57.35 ZS PMax-4h-black-2.jpg:0005-0634	44	116.545	111	122
30	2018-01-03-09.57.35 ZS PMax-4h-black-2.jpg:0006-0899	70	124.629	111	132
31	2018-01-03-09.57.35 ZS PMax-4h-black-2.jpg:0007-1228	146	164.13	159	170
32	2018-01-03-09.57.35 ZS PMax-4h-black-2.jpg:0008-1025	102	146.461	140	153
33	2018-01-03-09.57.35 ZS PMax-4h-black-2.jpg:0009-0757	86	123.081	119	134
34	2018-01-03-09.57.35 ZS PMax-4h-black-2.jpg:0010-1361	124	157.766	150	168
35	2018-01-03-09.57.35 ZS PMax-4h-black-2.jpg:0011-1449	104	155.394	146	160
36	2018-01-03-09.57.35 ZS PMax-4h-black-2.jpg:0012-2027	86	142.791	126	152		133.477
4h-3-4
37	2018-01-03-09.57.35 ZS PMax-4h-black-2.jpg:0013-1305	21	120.048	117	123
38	2018-01-03-09.57.35 ZS PMax-4h-black-2.jpg:0014-1371	34	117.588	109	124
39	2018-01-03-09.57.35 ZS PMax-4h-black-2.jpg:0015-1408	44	115.023	110	120
40	2018-01-03-09.57.35 ZS PMax-4h-black-2.jpg:0016-1327	36	113.222	109	123
41	2018-01-03-09.57.35 ZS PMax-4h-black-2.jpg:0017-1541	70	113.6	107	120
42	2018-01-03-09.57.35 ZS PMax-4h-black-2.jpg:0018-1715	124	119.968	109	125
43	2018-01-03-09.57.35 ZS PMax-4h-black-2.jpg:0019-2032	112	141.723	129	149
44	2018-01-03-09.57.35 ZS PMax-4h-black-2.jpg:0020-2243	96	149.719	135	157
45	2018-01-03-09.57.35 ZS PMax-4h-black-2.jpg:0021-2552	146	164.849	157	172
46	2018-01-03-09.57.35 ZS PMax-4h-black-2.jpg:0022-2622	60	156.133	150	163
47	2018-01-03-09.57.35 ZS PMax-4h-black-2.jpg:0023-2810	80	156.5	148	161
48	2018-01-03-09.57.35 ZS PMax-4h-black-2.jpg:0024-2943	64	147.312	142	158		134.64
4h-3-5
49	2018-01-03-09.57.35 ZS PMax-4h-black-2.jpg:0025-1721	52	114.885	110	120
50	2018-01-03-09.57.35 ZS PMax-4h-black-2.jpg:0026-1767	60	113.117	105	125
51	2018-01-03-09.57.35 ZS PMax-4h-black-2.jpg:0027-1810	60	108.617	104	118
52	2018-01-03-09.57.35 ZS PMax-4h-black-2.jpg:0028-1858	80	120.138	115	125
53	2018-01-03-09.57.35 ZS PMax-4h-black-2.jpg:0029-2019	69	118.116	112	128
54	2018-01-03-09.57.35 ZS PMax-4h-black-2.jpg:0030-2329	115	133.965	126	141
55	2018-01-03-09.57.35 ZS PMax-4h-black-2.jpg:0031-2499	146	146.418	141	152
56	2018-01-03-09.57.35 ZS PMax-4h-black-2.jpg:0032-2787	126	145.944	130	156
57	2018-01-03-09.57.35 ZS PMax-4h-black-2.jpg:0033-3001	137	162.051	151	170
58	2018-01-03-09.57.35 ZS PMax-4h-black-2.jpg:0034-3215	37	161.838	156	169
59	2018-01-03-09.57.35 ZS PMax-4h-black-2.jpg:0035-3274	64	157.094	133	168
60	2018-01-03-09.57.35 ZS PMax-4h-black-2.jpg:0036-3374	37	155.216	139	164		136.45
	Label	Area	Mean	Min	Max
8h-3-1
1	2018-01-03-10.06.00 ZS PMax-8h-black-1.jpg:0001-2674	112	119.205	107	127
2	2018-01-03-10.06.00 ZS PMax-8h-black-1.jpg:0002-2637	96	109.948	101	120
3	2018-01-03-10.06.00 ZS PMax-8h-black-1.jpg:0003-2604	104	112.827	103	121
4	2018-01-03-10.06.00 ZS PMax-8h-black-1.jpg:0004-2576	112	108.893	94	117
5	2018-01-03-10.06.00 ZS PMax-8h-black-1.jpg:0005-2457	166	122.392	117	128
6	2018-01-03-10.06.00 ZS PMax-8h-black-1.jpg:0006-2343	140	122.557	118	127
7	2018-01-03-10.06.00 ZS PMax-8h-black-1.jpg:0007-2222	228	118.754	109	128
8	2018-01-03-10.06.00 ZS PMax-8h-black-1.jpg:0008-2168	104	131.106	124	139
9	2018-01-03-10.06.00 ZS PMax-8h-black-1.jpg:0009-2122	166	145.012	129	152
10	2018-01-03-10.06.00 ZS PMax-8h-black-1.jpg:0010-2093	190	152.784	138	161
11	2018-01-03-10.06.00 ZS PMax-8h-black-1.jpg:0011-2056	124	136.258	126	146
12	2018-01-03-10.06.00 ZS PMax-8h-black-1.jpg:0012-2036	136	135.868	121	146		126.3
8h-3-2
13	2018-01-03-10.06.00 ZS PMax-8h-black-1.jpg:0013-2618	69	107.493	98	116
14	2018-01-03-10.06.00 ZS PMax-8h-black-1.jpg:0014-2652	52	107.75	100	114
15	2018-01-03-10.06.00 ZS PMax-8h-black-1.jpg:0015-2587	86	105.988	99	113
16	2018-01-03-10.06.00 ZS PMax-8h-black-1.jpg:0016-2565	80	110.625	97	121
17	2018-01-03-10.06.00 ZS PMax-8h-black-1.jpg:0017-2496	104	109.125	99	122
18	2018-01-03-10.06.00 ZS PMax-8h-black-1.jpg:0018-2366	166	118.199	112	126
19	2018-01-03-10.06.00 ZS PMax-8h-black-1.jpg:0019-2167	208	127.548	120	136
20	2018-01-03-10.06.00 ZS PMax-8h-black-1.jpg:0020-2253	190	118.874	113	125
21	2018-01-03-10.06.00 ZS PMax-8h-black-1.jpg:0021-2072	115	130.426	118	141
22	2018-01-03-10.06.00 ZS PMax-8h-black-1.jpg:0022-2059	124	138.516	114	152
23	2018-01-03-10.06.00 ZS PMax-8h-black-1.jpg:0023-1982	72	147.819	129	155
24	2018-01-03-10.06.00 ZS PMax-8h-black-1.jpg:0024-2005	52	150.192	134	158		122.713
8h-3-3
25	2018-01-03-10.06.00 ZS PMax-8h-black-1.jpg:0025-2848	36	109.556	105	115
26	2018-01-03-10.06.00 ZS PMax-8h-black-1.jpg:0026-2849	60	89.533	76	105
27	2018-01-03-10.06.00 ZS PMax-8h-black-1.jpg:0027-2840	52	102	98	107
28	2018-01-03-10.06.00 ZS PMax-8h-black-1.jpg:0028-2835	58	98.672	90	106
29	2018-01-03-10.06.00 ZS PMax-8h-black-1.jpg:0029-2777	86	88.105	84	95
30	2018-01-03-10.06.00 ZS PMax-8h-black-1.jpg:0030-2698	112	99.848	93	108
31	2018-01-03-10.06.00 ZS PMax-8h-black-1.jpg:0031-2749	104	99.25	89	110
32	2018-01-03-10.06.00 ZS PMax-8h-black-1.jpg:0032-2665	112	111.312	100	116
33	2018-01-03-10.06.00 ZS PMax-8h-black-1.jpg:0033-2590	96	135.25	120	143
34	2018-01-03-10.06.00 ZS PMax-8h-black-1.jpg:0034-2549	84	143.893	135	154
35	2018-01-03-10.06.00 ZS PMax-8h-black-1.jpg:0035-2482	146	146.349	137	152
36	2018-01-03-10.06.00 ZS PMax-8h-black-1.jpg:0036-2566	207	143.203	120	152		113.914
8h-3-4
37	2018-01-03-10.06.00 ZS PMax-8h-black-1.jpg:0037-2761	60	117.783	110	125
38	2018-01-03-10.06.00 ZS PMax-8h-black-1.jpg:0038-2748	37	123.486	116	130
39	2018-01-03-10.06.00 ZS PMax-8h-black-1.jpg:0039-2774	26	119.154	115	124
40	2018-01-03-10.06.00 ZS PMax-8h-black-1.jpg:0040-2737	34	116.912	113	120
41	2018-01-03-10.06.00 ZS PMax-8h-black-1.jpg:0041-2716	64	111.859	106	123
42	2018-01-03-10.06.00 ZS PMax-8h-black-1.jpg:0042-2657	104	102.49	98	108
43	2018-01-03-10.06.00 ZS PMax-8h-black-1.jpg:0043-2600	137	108.686	102	114
44	2018-01-03-10.06.00 ZS PMax-8h-black-1.jpg:0044-2554	192	120.203	115	126
45	2018-01-03-10.06.00 ZS PMax-8h-black-1.jpg:0045-2474	136	139.36	123	147
46	2018-01-03-10.06.00 ZS PMax-8h-black-1.jpg:0046-2443	207	144.077	132	151
47	2018-01-03-10.06.00 ZS PMax-8h-black-1.jpg:0047-2503	240	134.1	125	147
48	2018-01-03-10.06.00 ZS PMax-8h-black-1.jpg:0048-2413	112	139.411	128	147		123.127
8h-3-5
49	2018-01-03-10.06.00 ZS PMax-8h-black-1.jpg:0049-3797	70	122.086	115	130
50	2018-01-03-10.06.00 ZS PMax-8h-black-1.jpg:0050-3708	52	121.423	117	127
51	2018-01-03-10.06.00 ZS PMax-8h-black-1.jpg:0051-3852	72	121.889	116	131
52	2018-01-03-10.06.00 ZS PMax-8h-black-1.jpg:0052-3649	97	119.433	111	128
53	2018-01-03-10.06.00 ZS PMax-8h-black-1.jpg:0053-3461	176	117.097	107	126
54	2018-01-03-10.06.00 ZS PMax-8h-black-1.jpg:0054-3234	115	126.122	112	132
55	2018-01-03-10.06.00 ZS PMax-8h-black-1.jpg:0055-3109	192	135.87	127	144
56	2018-01-03-10.06.00 ZS PMax-8h-black-1.jpg:0056-2998	146	143.226	133	153
57	2018-01-03-10.06.00 ZS PMax-8h-black-1.jpg:0057-2823	79	147.57	140	155
58	2018-01-03-10.06.00 ZS PMax-8h-black-1.jpg:0058-2746	84	149.548	140	158
59	2018-01-03-10.06.00 ZS PMax-8h-black-1.jpg:0059-2675	52	152.519	147	157
60	2018-01-03-10.06.00 ZS PMax-8h-black-1.jpg:0060-2855	96	155.062	148	161		134.32
	Label	Area	Mean	Min	Max
12h-3-1
1	2018-01-03-10.08.59 ZS PMax-12h-black-1.jpg:0001-3065	37	96.216	92	106
2	2018-01-03-10.08.59 ZS PMax-12h-black-1.jpg:0002-3101	34	90.382	87	97
3	2018-01-03-10.08.59 ZS PMax-12h-black-1.jpg:0003-3015	60	104.867	99	116
4	2018-01-03-10.08.59 ZS PMax-12h-black-1.jpg:0004-2973	52	98.173	94	104
5	2018-01-03-10.08.59 ZS PMax-12h-black-1.jpg:0005-2776	112	103.384	97	110
6	2018-01-03-10.08.59 ZS PMax-12h-black-1.jpg:0006-2273	208	94.322	89	102
7	2018-01-03-10.08.59 ZS PMax-12h-black-1.jpg:0007-1637	176	100.898	97	110
8	2018-01-03-10.08.59 ZS PMax-12h-black-1.jpg:0008-1281	316	123.759	115	136
9	2018-01-03-10.08.59 ZS PMax-12h-black-1.jpg:0009-0874	32	146.781	130	153
10	2018-01-03-10.08.59 ZS PMax-12h-black-1.jpg:0010-0774	31	162.484	152	169
11	2018-01-03-10.08.59 ZS PMax-12h-black-1.jpg:0011-0624	32	163.156	159	166
12	2018-01-03-10.08.59 ZS PMax-12h-black-1.jpg:0012-0496	32	157.188	148	162		120.134
12h-3-2
13	2018-01-03-10.08.59 ZS PMax-12h-black-2.jpg:0001-2923	32	112.125	109	119
14	2018-01-03-10.08.59 ZS PMax-12h-black-2.jpg:0002-2906	32	110.531	108	114
15	2018-01-03-10.08.59 ZS PMax-12h-black-2.jpg:0003-2893	26	116.615	114	120
16	2018-01-03-10.08.59 ZS PMax-12h-black-2.jpg:0004-2933	21	96.476	91	110
17	2018-01-03-10.08.59 ZS PMax-12h-black-2.jpg:0005-2807	80	115.825	111	128
18	2018-01-03-10.08.59 ZS PMax-12h-black-2.jpg:0006-2702	104	110.173	107	115
19	2018-01-03-10.08.59 ZS PMax-12h-black-2.jpg:0007-2531	104	107.933	104	112
20	2018-01-03-10.08.59 ZS PMax-12h-black-2.jpg:0008-2478	86	92.035	85	98
21	2018-01-03-10.08.59 ZS PMax-12h-black-2.jpg:0009-2403	72	124.417	113	141
22	2018-01-03-10.08.59 ZS PMax-12h-black-2.jpg:0010-2338	44	128.205	120	138
23	2018-01-03-10.08.59 ZS PMax-12h-black-2.jpg:0011-2313	69	151.957	140	158
24	2018-01-03-10.08.59 ZS PMax-12h-black-2.jpg:0012-2281	69	149.899	143	158		118.016
12h-3-3
25	2018-01-03-10.08.59 ZS PMax-12h-black-2.jpg:0013-2446	32	121.688	118	125
26	2018-01-03-10.08.59 ZS PMax-12h-black-2.jpg:0014-2482	44	127.795	123	132
27	2018-01-03-10.08.59 ZS PMax-12h-black-2.jpg:0015-2511	34	129.618	126	132
28	2018-01-03-10.08.59 ZS PMax-12h-black-2.jpg:0016-2545	44	123.205	121	127
29	2018-01-03-10.08.59 ZS PMax-12h-black-2.jpg:0017-2686	166	118.976	114	125
30	2018-01-03-10.08.59 ZS PMax-12h-black-2.jpg:0018-2920	124	110.516	107	115
31	2018-01-03-10.08.59 ZS PMax-12h-black-2.jpg:0019-3013	208	118.51	108	140
32	2018-01-03-10.08.59 ZS PMax-12h-black-2.jpg:0020-3254	146	145.062	141	150
33	2018-01-03-10.08.59 ZS PMax-12h-black-2.jpg:0021-3312	31	127.839	124	132
34	2018-01-03-10.08.59 ZS PMax-12h-black-2.jpg:0022-3365	69	162.681	149	167
35	2018-01-03-10.08.59 ZS PMax-12h-black-2.jpg:0023-3383	34	142.5	138	147
36	2018-01-03-10.08.59 ZS PMax-12h-black-2.jpg:0024-3404	34	135.206	130	140		130.3
12h-3-4
37	2018-01-03-10.08.59 ZS PMax-12h-black-2.jpg:0025-3136	36	101.889	99	107
38	2018-01-03-10.08.59 ZS PMax-12h-black-2.jpg:0026-3076	32	106.438	103	110
39	2018-01-03-10.08.59 ZS PMax-12h-black-2.jpg:0027-3012	32	103.875	100	108
40	2018-01-03-10.08.59 ZS PMax-12h-black-2.jpg:0028-2955	34	97.353	92	102
41	2018-01-03-10.08.59 ZS PMax-12h-black-2.jpg:0029-2715	72	106.028	103	109
42	2018-01-03-10.08.59 ZS PMax-12h-black-2.jpg:0030-2407	104	101.471	95	107
43	2018-01-03-10.08.59 ZS PMax-12h-black-2.jpg:0031-2011	96	103.188	96	109
44	2018-01-03-10.08.59 ZS PMax-12h-black-2.jpg:0032-1529	112	125.214	114	132
45	2018-01-03-10.08.59 ZS PMax-12h-black-2.jpg:0033-1107	44	161.318	156	167
46	2018-01-03-10.08.59 ZS PMax-12h-black-2.jpg:0034-1364	86	130.744	125	142
47	2018-01-03-10.08.59 ZS PMax-12h-black-2.jpg:0035-0958	79	140.215	131	147
48	2018-01-03-10.08.59 ZS PMax-12h-black-2.jpg:0036-1268	34	142.559	133	150		118.358
	Label	Area	Mean	Min	Max
16h-3-1
1	2018-01-03-10.19.15 ZS PMax-16h-black-1.jpg:0001-0428	44	123.341	118	135
2	2018-01-03-10.19.15 ZS PMax-16h-black-1.jpg:0002-0505	51	122.922	116	129
3	2018-01-03-10.19.15 ZS PMax-16h-black-1.jpg:0003-0647	51	115.235	109	130
4	2018-01-03-10.19.15 ZS PMax-16h-black-1.jpg:0004-0719	37	110.676	105	122
5	2018-01-03-10.19.15 ZS PMax-16h-black-1.jpg:0005-1074	32	97.281	93	103
6	2018-01-03-10.19.15 ZS PMax-16h-black-1.jpg:0006-1314	84	97.881	93	107
7	2018-01-03-10.19.15 ZS PMax-16h-black-1.jpg:0007-1476	58	84.414	80	91
8	2018-01-03-10.19.15 ZS PMax-16h-black-1.jpg:0008-1938	97	93.124	88	100
9	2018-01-03-10.19.15 ZS PMax-16h-black-1.jpg:0009-2028	44	82.114	77	90
10	2018-01-03-10.19.15 ZS PMax-16h-black-1.jpg:0010-2136	37	89.135	85	97
11	2018-01-03-10.19.15 ZS PMax-16h-black-1.jpg:0011-2244	12	78	75	85
12	2018-01-03-10.19.15 ZS PMax-16h-black-1.jpg:0012-2357	51	98.196	95	102		99.3599
16h-3-2
13	2018-01-03-10.19.15 ZS PMax-16h-black-1.jpg:0013-1531	32	108.281	105	112
14	2018-01-03-10.19.15 ZS PMax-16h-black-1.jpg:0014-1554	34	112.441	109	118
15	2018-01-03-10.19.15 ZS PMax-16h-black-1.jpg:0015-1571	34	118.941	117	122
16	2018-01-03-10.19.15 ZS PMax-16h-black-1.jpg:0016-1540	32	114.969	112	119
17	2018-01-03-10.19.15 ZS PMax-16h-black-1.jpg:0017-1630	86	109	100	132
18	2018-01-03-10.19.15 ZS PMax-16h-black-1.jpg:0018-1682	104	112.933	104	121
19	2018-01-03-10.19.15 ZS PMax-16h-black-1.jpg:0019-1712	115	113.965	108	119
20	2018-01-03-10.19.15 ZS PMax-16h-black-1.jpg:0020-1753	124	105.226	94	116
21	2018-01-03-10.19.15 ZS PMax-16h-black-1.jpg:0021-1580	64	150.047	143	154
22	2018-01-03-10.19.15 ZS PMax-16h-black-1.jpg:0022-1522	64	148.484	141	156
23	2018-01-03-10.19.15 ZS PMax-16h-black-1.jpg:0023-1476	52	146.981	131	157
24	2018-01-03-10.19.15 ZS PMax-16h-black-1.jpg:0024-1431	44	155.386	147	165		124.721
16h-3-3
25	2018-01-03-10.19.15 ZS PMax-16h-black-1.jpg:0025-2262	16	116.875	114	122
26	2018-01-03-10.19.15 ZS PMax-16h-black-1.jpg:0026-2315	26	116.346	115	119
27	2018-01-03-10.19.15 ZS PMax-16h-black-1.jpg:0027-2287	32	114.594	111	122
28	2018-01-03-10.19.15 ZS PMax-16h-black-1.jpg:0028-2359	37	108.784	105	112
29	2018-01-03-10.19.15 ZS PMax-16h-black-1.jpg:0029-2426	80	95.4	91	100
30	2018-01-03-10.19.15 ZS PMax-16h-black-1.jpg:0030-2579	86	78.651	74	87
31	2018-01-03-10.19.15 ZS PMax-16h-black-1.jpg:0031-2501	70	86.3	82	90
32	2018-01-03-10.19.15 ZS PMax-16h-black-1.jpg:0032-2776	124	72.718	65	89
33	2018-01-03-10.19.15 ZS PMax-16h-black-1.jpg:0033-2902	60	76.65	74	83
34	2018-01-03-10.19.15 ZS PMax-16h-black-1.jpg:0034-2993	37	76.811	74	82
35	2018-01-03-10.19.15 ZS PMax-16h-black-1.jpg:0035-3099	52	96.5	94	99
36	2018-01-03-10.19.15 ZS PMax-16h-black-1.jpg:0036-3178	52	111.596	104	122		95.9354
16h-3-4
37	2018-01-03-10.19.15 ZS PMax-16h-black-2.jpg:0001-2425	70	110.414	104	119
38	2018-01-03-10.19.15 ZS PMax-16h-black-2.jpg:0002-2405	80	106.463	101	116
39	2018-01-03-10.19.15 ZS PMax-16h-black-2.jpg:0003-2384	60	101.583	95	106
40	2018-01-03-10.19.15 ZS PMax-16h-black-2.jpg:0004-2361	69	109.174	104	116
41	2018-01-03-10.19.15 ZS PMax-16h-black-2.jpg:0005-2190	124	82.597	77	98
42	2018-01-03-10.19.15 ZS PMax-16h-black-2.jpg:0006-2072	177	90.876	77	126
43	2018-01-03-10.19.15 ZS PMax-16h-black-2.jpg:0007-1915	166	103.584	98	117
44	2018-01-03-10.19.15 ZS PMax-16h-black-2.jpg:0008-1757	207	111.821	100	127
45	2018-01-03-10.19.15 ZS PMax-16h-black-2.jpg:0009-1633	69	126.275	115	139
46	2018-01-03-10.19.15 ZS PMax-16h-black-2.jpg:0010-1545	60	136.65	130	149
47	2018-01-03-10.19.15 ZS PMax-16h-black-2.jpg:0011-1457	60	154.067	145	161
48	2018-01-03-10.19.15 ZS PMax-16h-black-2.jpg:0012-1517	79	151.747	143	160		115.438
16h-3-5
49	2018-01-03-10.19.15 ZS PMax-16h-black-2.jpg:0013-1932	42	126.524	124	129
50	2018-01-03-10.19.15 ZS PMax-16h-black-2.jpg:0014-1883	52	127.019	121	131
51	2018-01-03-10.19.15 ZS PMax-16h-black-2.jpg:0015-1967	60	122.717	116	130
52	2018-01-03-10.19.15 ZS PMax-16h-black-2.jpg:0016-1902	72	126.778	114	134
53	2018-01-03-10.19.15 ZS PMax-16h-black-2.jpg:0017-1750	70	109.471	104	118
54	2018-01-03-10.19.15 ZS PMax-16h-black-2.jpg:0018-1604	70	104.143	101	111
55	2018-01-03-10.19.15 ZS PMax-16h-black-2.jpg:0019-1325	102	104.441	100	108
56	2018-01-03-10.19.15 ZS PMax-16h-black-2.jpg:0020-1150	70	108.686	104	112
57	2018-01-03-10.19.15 ZS PMax-16h-black-2.jpg:0021-0983	86	115.256	108	126
58	2018-01-03-10.19.15 ZS PMax-16h-black-2.jpg:0022-0920	104	124.673	116	134
59	2018-01-03-10.19.15 ZS PMax-16h-black-2.jpg:0023-0871	70	132.614	128	140
60	2018-01-03-10.19.15 ZS PMax-16h-black-2.jpg:0024-0820	60	124.033	118	135		118.863
	Label	Area	Mean	Min	Max
20h-3-1
1	2018-01-03-10.37.50 ZS PMax-20h-black-1.jpg:0001-0218	60	109.883	103	123
2	2018-01-03-10.37.50 ZS PMax-20h-black-1.jpg:0002-0259	34	104.5	98	114
3	2018-01-03-10.37.50 ZS PMax-20h-black-1.jpg:0003-0305	36	112.917	110	119
4	2018-01-03-10.37.50 ZS PMax-20h-black-1.jpg:0004-0354	32	107	105	109
5	2018-01-03-10.37.50 ZS PMax-20h-black-1.jpg:0005-0566	96	109.958	107	115
6	2018-01-03-10.37.50 ZS PMax-20h-black-1.jpg:0006-0865	140	98.4	95	108
7	2018-01-03-10.37.50 ZS PMax-20h-black-1.jpg:0007-1132	102	101.686	99	108
8	2018-01-03-10.37.50 ZS PMax-20h-black-1.jpg:0008-1526	156	90.083	82	100
9	2018-01-03-10.37.50 ZS PMax-20h-black-1.jpg:0009-1688	112	85.991	80	97
10	2018-01-03-10.37.50 ZS PMax-20h-black-1.jpg:0010-1909	70	89.614	84	98
11	2018-01-03-10.37.50 ZS PMax-20h-black-1.jpg:0011-2125	64	95.438	91	101
12	2018-01-03-10.37.50 ZS PMax-20h-black-1.jpg:0012-2294	60	92.833	90	99		99.8586
20h-3-2
13	2018-01-03-10.37.50 ZS PMax-20h-black-2.jpg:0001-0346	115	125.652	122	143
14	2018-01-03-10.37.50 ZS PMax-20h-black-2.jpg:0002-0375	84	108.06	104	114
15	2018-01-03-10.37.50 ZS PMax-20h-black-2.jpg:0003-0409	79	107.405	102	115
16	2018-01-03-10.37.50 ZS PMax-20h-black-2.jpg:0004-0449	140	104.05	96	116
17	2018-01-03-10.37.50 ZS PMax-20h-black-2.jpg:0005-0497	166	104.048	93	126
18	2018-01-03-10.37.50 ZS PMax-20h-black-2.jpg:0006-0560	192	106.281	100	136
19	2018-01-03-10.37.50 ZS PMax-20h-black-2.jpg:0007-0618	166	106.669	101	119
20	2018-01-03-10.37.50 ZS PMax-20h-black-2.jpg:0008-0534	248	102.343	98	108
21	2018-01-03-10.37.50 ZS PMax-20h-black-2.jpg:0009-0679	86	88.14	80	100
22	2018-01-03-10.37.50 ZS PMax-20h-black-2.jpg:0010-0711	112	110.473	102	125
23	2018-01-03-10.37.50 ZS PMax-20h-black-2.jpg:0011-0731	70	106.171	93	117
24	2018-01-03-10.37.50 ZS PMax-20h-black-2.jpg:0012-0762	52	124.462	119	131		107.813
20h-3-3
25	2018-01-03-10.37.50 ZS PMax-20h-black-2.jpg:0013-0270	52	115.654	110	124
26	2018-01-03-10.37.50 ZS PMax-20h-black-2.jpg:0014-0283	86	113.14	108	124
27	2018-01-03-10.37.50 ZS PMax-20h-black-2.jpg:0015-0311	70	113.729	109	121
28	2018-01-03-10.37.50 ZS PMax-20h-black-2.jpg:0016-0339	86	98.36	93	106
29	2018-01-03-10.37.50 ZS PMax-20h-black-2.jpg:0017-0389	124	99.516	94	116
30	2018-01-03-10.37.50 ZS PMax-20h-black-2.jpg:0018-0436	216	95.426	90	110
31	2018-01-03-10.37.50 ZS PMax-20h-black-2.jpg:0019-0719	156	80.013	70	104
32	2018-01-03-10.37.50 ZS PMax-20h-black-2.jpg:0020-1087	177	108.989	97	121
33	2018-01-03-10.37.50 ZS PMax-20h-black-2.jpg:0021-1158	60	99.633	82	113
34	2018-01-03-10.37.50 ZS PMax-20h-black-2.jpg:0022-1231	69	106.42	85	131
35	2018-01-03-10.37.50 ZS PMax-20h-black-2.jpg:0023-1365	70	113.714	95	131
36	2018-01-03-10.37.50 ZS PMax-20h-black-2.jpg:0024-1429	80	118.175	110	137		105.231
	Label	Area	Mean	Min	Max
24h-3-1
1	2018-01-03-10.53.27 ZS PMax-24h-black-1.jpg:0001-0295	44	105.364	102	117
2	2018-01-03-10.53.27 ZS PMax-24h-black-1.jpg:0002-0331	52	107.635	104	111
3	2018-01-03-10.53.27 ZS PMax-24h-black-1.jpg:0003-0370	34	98.529	95	103
4	2018-01-03-10.53.27 ZS PMax-24h-black-1.jpg:0004-0395	52	99.981	96	105
5	2018-01-03-10.53.27 ZS PMax-24h-black-1.jpg:0005-0496	104	92.894	90	97
6	2018-01-03-10.53.27 ZS PMax-24h-black-1.jpg:0006-0642	104	81.308	78	85
7	2018-01-03-10.53.27 ZS PMax-24h-black-1.jpg:0007-0751	166	96.5	91	128
8	2018-01-03-10.53.27 ZS PMax-24h-black-1.jpg:0008-0847	146	95.541	88	115
9	2018-01-03-10.53.27 ZS PMax-24h-black-1.jpg:0009-0999	104	96.154	85	133
10	2018-01-03-10.53.27 ZS PMax-24h-black-1.jpg:0010-1053	60	92.517	88	101
11	2018-01-03-10.53.27 ZS PMax-24h-black-1.jpg:0011-1157	52	93.442	87	106
12	2018-01-03-10.53.27 ZS PMax-24h-black-1.jpg:0012-1206	44	104.727	97	122		97.0493
24h-3-2
13	2018-01-03-10.53.27 ZS PMax-24h-black-1.jpg:0013-1055	44	107.295	104	112
14	2018-01-03-10.53.27 ZS PMax-24h-black-1.jpg:0014-1058	52	107.058	104	115
15	2018-01-03-10.53.27 ZS PMax-24h-black-1.jpg:0015-1054	60	120.017	114	124
16	2018-01-03-10.53.27 ZS PMax-24h-black-1.jpg:0016-1053	42	115.643	112	120
17	2018-01-03-10.53.27 ZS PMax-24h-black-1.jpg:0017-1056	80	108	98	117
18	2018-01-03-10.53.27 ZS PMax-24h-black-1.jpg:0018-1075	112	104.696	102	109
19	2018-01-03-10.53.27 ZS PMax-24h-black-1.jpg:0019-1109	112	110.357	107	115
20	2018-01-03-10.53.27 ZS PMax-24h-black-1.jpg:0020-1126	176	100.102	89	120
21	2018-01-03-10.53.27 ZS PMax-24h-black-1.jpg:0021-1154	115	98.67	94	109
22	2018-01-03-10.53.27 ZS PMax-24h-black-1.jpg:0022-1182	156	84.077	79	91
23	2018-01-03-10.53.27 ZS PMax-24h-black-1.jpg:0023-1206	146	91.664	87	103
24	2018-01-03-10.53.27 ZS PMax-24h-black-1.jpg:0024-1231	69	75.928	67	90		101.959
24h-3-3
25	2018-01-03-10.53.27 ZS PMax-24h-black-2.jpg:0001-1757	69	111.826	107	117
26	2018-01-03-10.53.27 ZS PMax-24h-black-2.jpg:0002-1759	60	110.467	101	118
27	2018-01-03-10.53.27 ZS PMax-24h-black-2.jpg:0003-1759	64	105.547	101	115
28	2018-01-03-10.53.27 ZS PMax-24h-black-2.jpg:0004-1758	64	99.031	96	102
29	2018-01-03-10.53.27 ZS PMax-24h-black-2.jpg:0005-1747	224	93.004	87	107
30	2018-01-03-10.53.27 ZS PMax-24h-black-2.jpg:0006-1717	96	86.729	81	93
31	2018-01-03-10.53.27 ZS PMax-24h-black-2.jpg:0007-1704	166	87.458	79	100
32	2018-01-03-10.53.27 ZS PMax-24h-black-2.jpg:0008-1703	112	86.821	81	94
33	2018-01-03-10.53.27 ZS PMax-24h-black-2.jpg:0009-1704	80	80.85	74	96
34	2018-01-03-10.53.27 ZS PMax-24h-black-2.jpg:0010-1705	96	80.656	76	103
35	2018-01-03-10.53.27 ZS PMax-24h-black-2.jpg:0011-1702	44	95.841	86	112
36	2018-01-03-10.53.27 ZS PMax-24h-black-2.jpg:0012-1727	60	103.633	95	130		95.1553
24h-3-4
37	2018-01-03-10.53.27 ZS PMax-24h-black-2.jpg:0013-2229	34	101.235	97	109
38	2018-01-03-10.53.27 ZS PMax-24h-black-2.jpg:0014-2198	34	108.529	105	113
39	2018-01-03-10.53.27 ZS PMax-24h-black-2.jpg:0015-2170	60	102.25	98	108
40	2018-01-03-10.53.27 ZS PMax-24h-black-2.jpg:0016-2131	60	95.75	91	101
41	2018-01-03-10.53.27 ZS PMax-24h-black-2.jpg:0017-2039	69	83.493	76	94
42	2018-01-03-10.53.27 ZS PMax-24h-black-2.jpg:0018-1921	112	83.214	77	87
43	2018-01-03-10.53.27 ZS PMax-24h-black-2.jpg:0019-1751	177	88.463	80	99
44	2018-01-03-10.53.27 ZS PMax-24h-black-2.jpg:0020-1660	137	101.577	99	105
45	2018-01-03-10.53.27 ZS PMax-24h-black-2.jpg:0021-1592	89	90.933	85	98
46	2018-01-03-10.53.27 ZS PMax-24h-black-2.jpg:0022-1545	86	78.198	73	99
47	2018-01-03-10.53.27 ZS PMax-24h-black-2.jpg:0023-1499	70	77.514	74	87
48	2018-01-03-10.53.27 ZS PMax-24h-black-2.jpg:0024-1444	60	90.983	86	105		91.8449
24h-3-5
49	2018-01-03-10.53.27 ZS PMax-24h-black-2.jpg:0025-2061	32	102.125	100	106
50	2018-01-03-10.53.27 ZS PMax-24h-black-2.jpg:0026-2011	34	105.441	103	110
51	2018-01-03-10.53.27 ZS PMax-24h-black-2.jpg:0027-1967	32	103.406	100	110
52	2018-01-03-10.53.27 ZS PMax-24h-black-2.jpg:0028-2103	26	101.692	97	114
53	2018-01-03-10.53.27 ZS PMax-24h-black-2.jpg:0029-1680	124	84.355	80	90
54	2018-01-03-10.53.27 ZS PMax-24h-black-2.jpg:0030-1228	160	84.162	78	94
55	2018-01-03-10.53.27 ZS PMax-24h-black-2.jpg:0031-0826	148	74.25	68	83
56	2018-01-03-10.53.27 ZS PMax-24h-black-2.jpg:0032-0614	112	76.062	70	83
57	2018-01-03-10.53.27 ZS PMax-24h-black-2.jpg:0033-0437	60	62.633	56	84
58	2018-01-03-10.53.27 ZS PMax-24h-black-2.jpg:0034-0352	44	68.886	61	88
59	2018-01-03-10.53.27 ZS PMax-24h-black-2.jpg:0035-0224	60	82.75	73	90
60	2018-01-03-10.53.27 ZS PMax-24h-black-2.jpg:0036-0147	31	81.839	77	88		85.6334
	Label	Area	Mean	Min	Max
adult-3-1
1	2018-01-03-11.09.47 ZS PMax-adult-black-1.jpg:0001-1833	70	77.471	72	96
2	2018-01-03-11.09.47 ZS PMax-adult-black-1.jpg:0002-1825	51	78.608	76	82
3	2018-01-03-11.09.47 ZS PMax-adult-black-1.jpg:0003-1818	70	80.186	69	86
4	2018-01-03-11.09.47 ZS PMax-adult-black-1.jpg:0004-1844	52	76.692	71	91
5	2018-01-03-11.09.47 ZS PMax-adult-black-1.jpg:0005-1804	176	77.858	73	96
6	2018-01-03-11.09.47 ZS PMax-adult-black-1.jpg:0006-1783	166	63.006	55	80
7	2018-01-03-11.09.47 ZS PMax-adult-black-1.jpg:0007-1776	177	64.537	57	72
8	2018-01-03-11.09.47 ZS PMax-adult-black-1.jpg:0008-1778	225	75.387	69	86
9	2018-01-03-11.09.47 ZS PMax-adult-black-1.jpg:0009-1769	136	78.103	72	84
10	2018-01-03-11.09.47 ZS PMax-adult-black-1.jpg:0010-1757	228	65.487	60	91
11	2018-01-03-11.09.47 ZS PMax-adult-black-1.jpg:0011-1746	104	59.385	52	76
12	2018-01-03-11.09.47 ZS PMax-adult-black-1.jpg:0012-1743	96	58.25	51	73		71.2475
adult-3-2
13	2018-01-03-11.09.47 ZS PMax-adult-black-1.jpg:0013-2529	26	90.269	84	94
14	2018-01-03-11.09.47 ZS PMax-adult-black-1.jpg:0014-2495	32	88.562	84	95
15	2018-01-03-11.09.47 ZS PMax-adult-black-1.jpg:0015-2428	36	97.583	91	103
16	2018-01-03-11.09.47 ZS PMax-adult-black-1.jpg:0016-2459	32	91.062	85	100
17	2018-01-03-11.09.47 ZS PMax-adult-black-1.jpg:0017-2270	104	90.788	87	98
18	2018-01-03-11.09.47 ZS PMax-adult-black-1.jpg:0018-2046	176	95.466	91	103
19	2018-01-03-11.09.47 ZS PMax-adult-black-1.jpg:0019-1862	136	83.5	80	89
20	2018-01-03-11.09.47 ZS PMax-adult-black-1.jpg:0020-1641	146	98.719	94	105
21	2018-01-03-11.09.47 ZS PMax-adult-black-1.jpg:0021-1497	208	107.13	83	114
22	2018-01-03-11.09.47 ZS PMax-adult-black-1.jpg:0022-1310	79	129	115	134
23	2018-01-03-11.09.47 ZS PMax-adult-black-1.jpg:0023-1103	80	151.525	144	158
24	2018-01-03-11.09.47 ZS PMax-adult-black-1.jpg:0024-0813	79	147.696	114	155		105.942
adult-3-3
25	2018-01-03-11.09.47 ZS PMax-adult-black-1.jpg:0025-3268	26	58.308	52	65
26	2018-01-03-11.09.47 ZS PMax-adult-black-1.jpg:0026-3223	21	57.905	54	63
27	2018-01-03-11.09.47 ZS PMax-adult-black-1.jpg:0027-3179	26	56.846	53	65
28	2018-01-03-11.09.47 ZS PMax-adult-black-1.jpg:0028-3144	12	61.5	58	66
29	2018-01-03-11.09.47 ZS PMax-adult-black-1.jpg:0029-2918	60	59.833	56	66
30	2018-01-03-11.09.47 ZS PMax-adult-black-1.jpg:0030-2435	124	63.944	59	72
31	2018-01-03-11.09.47 ZS PMax-adult-black-1.jpg:0031-1907	208	62.788	57	84
32	2018-01-03-11.09.47 ZS PMax-adult-black-1.jpg:0032-1476	112	60.214	56	67
33	2018-01-03-11.09.47 ZS PMax-adult-black-1.jpg:0033-1309	137	58.737	51	67
34	2018-01-03-11.09.47 ZS PMax-adult-black-1.jpg:0034-1175	156	59.051	55	67
35	2018-01-03-11.09.47 ZS PMax-adult-black-1.jpg:0035-1041	115	63.087	60	69
36	2018-01-03-11.09.47 ZS PMax-adult-black-1.jpg:0036-0878	84	67.976	63	79		60.8491
adult-3-4
37	2018-01-03-11.09.47 ZS PMax-adult-black-2.jpg:0001-0984	52	90.019	87	105
38	2018-01-03-11.09.47 ZS PMax-adult-black-2.jpg:0002-1034	80	77.325	71	95
39	2018-01-03-11.09.47 ZS PMax-adult-black-2.jpg:0003-1102	80	83.075	78	89
40	2018-01-03-11.09.47 ZS PMax-adult-black-2.jpg:0004-1164	79	75.975	69	83
41	2018-01-03-11.09.47 ZS PMax-adult-black-2.jpg:0005-1417	208	80.538	74	113
42	2018-01-03-11.09.47 ZS PMax-adult-black-2.jpg:0006-1881	176	72.369	67	80
43	2018-01-03-11.09.47 ZS PMax-adult-black-2.jpg:0007-2184	214	72.542	68	78
44	2018-01-03-11.09.47 ZS PMax-adult-black-2.jpg:0008-2527	176	71.011	65	78
45	2018-01-03-11.09.47 ZS PMax-adult-black-2.jpg:0009-2676	97	69.804	66	74
46	2018-01-03-11.09.47 ZS PMax-adult-black-2.jpg:0010-2839	146	55.699	48	64
47	2018-01-03-11.09.47 ZS PMax-adult-black-2.jpg:0011-3029	104	57.971	54	61
48	2018-01-03-11.09.47 ZS PMax-adult-black-2.jpg:0012-3182	80	63.112	52	80		72.4533
adult-3-5
49	2018-01-03-11.09.47 ZS PMax-adult-black-2.jpg:0013-1447	52	91.288	85	103
50	2018-01-03-11.09.47 ZS PMax-adult-black-2.jpg:0014-1459	52	81.962	76	91
51	2018-01-03-11.09.47 ZS PMax-adult-black-2.jpg:0015-1471	44	79.773	76	85
52	2018-01-03-11.09.47 ZS PMax-adult-black-2.jpg:0016-1485	64	74.984	70	82
53	2018-01-03-11.09.47 ZS PMax-adult-black-2.jpg:0017-1510	112	74.75	67	86
54	2018-01-03-11.09.47 ZS PMax-adult-black-2.jpg:0018-1541	166	79.596	76	87
55	2018-01-03-11.09.47 ZS PMax-adult-black-2.jpg:0019-1560	229	74.515	67	97
56	2018-01-03-11.09.47 ZS PMax-adult-black-2.jpg:0020-1571	192	62.188	55	69
57	2018-01-03-11.09.47 ZS PMax-adult-black-2.jpg:0021-1622	176	66.267	58	84
58	2018-01-03-11.09.47 ZS PMax-adult-black-2.jpg:0022-1684	166	68.145	59	90
59	2018-01-03-11.09.47 ZS PMax-adult-black-2.jpg:0023-1585	151	57.113	51	76
60	2018-01-03-11.09.47 ZS PMax-adult-black-2.jpg:0024-1644	124	63.484	57	76		72.8388

## Sheet: %Darkness_calculation
		timepoint-individual-hair	mean single hair grey value		timepoint-individual pupa (biological replicates)-indiviudal hair (within individual hair replicates)	mean single hair grey value		timepoint-individual pupa (biological replicates)-indiviudal hair (within individual hair replicates)	mean single hair grey value		timepoint-individual pupa (biological replicates)-indiviudal hair (within individual hair replicates)	mean single hair grey value		timepoint-individual pupa (biological replicates)-indiviudal hair (within individual hair replicates)	mean single hair grey value		timepoint-individual pupa (biological replicates)-indiviudal hair (within individual hair replicates)	mean single hair grey value		timepoint-individual pupa (biological replicates)-indiviudal hair (within individual hair replicates)	mean single hair grey value		timepoint-individual pupa-indiviudal hair	mean single hair grey value
individual-1	hair-1	0h-1-1	139.297		4h-1-1	107.94		8h-1-1	142.62		12h-1-1	95.3018		16h-1-1	96.234		20h-1-1	58.7625		24h-1-1	83.8609		adult-1-1	50.1395
individual-1	hair-2	0h-1-2	152.272		4h-1-2	100.865		8h-1-2	101.907		12h-1-2	104.8		16h-1-2	102.034		20h-1-2	63.2145		24h-1-2	36.6623		adult-1-2	52.5297
individual-1	hair-3	0h-1-3	143.209		4h-1-3	88.9116		8h-1-3	104.547		12h-1-3	81.9165		16h-1-3	85.8134		20h-1-3	62.7961		24h-1-3	47.1528		adult-1-3	30.8084
individual-1	hair-4	0h-1-4	150.596		4h-1-4	114.75		8h-1-4	129.923		12h-1-4	93.1181		16h-1-4	76.0876		20h-1-4	71.9792		24h-1-4	48.1391		adult-1-4	33.0731
individual-1	hair-5				4h-1-5	144.495
		mean individual grey value	146.343			111.392			119.749			93.7842			90.0422			64.1881			53.9538			41.6377
individual-2	hair-1	0h-2-1	151.591		4h-2-1	182.924		8h-2-1	127.108		12h-2-1	124.177		16h-2-1	112.135		20h-2-1	106.492		24h-2-1	87.6719		adult-rep2-1	56.8416
individual-2	hair-2	0h-2-2	156.22		4h-2-2	150.519					12h-2-2	110.687		16h-2-2	111.032		20h-2-2	106.692		24h-2-2	94.5953		adult-rep2-2	61.5024
individual-2	hair-3	0h-2-3	162.565		4h-2-3	129.869					12h-2-3	126.89		16h-2-3	120.059		20h-2-3	98.7223		24h-2-3	98.1388		adult-rep2-3	98.4512
individual-2	hair-4	0h-2-4	149.945		4h-2-4	136.619					12h-2-4	131.617					20h-2-4	83.9823		24h-2-4	89.4653
individual-2	hair-5
		mean individual grey value	155.08			149.983			127.108			123.343			114.409			98.9721			92.4678			72.2651
individual-3	hair-1	0h-3-1	130.161		4h-3-1	152.343		8h-3-1	126.3		12h-3-1	120.134		16h-3-1	99.3599		20h-3-1	99.8586		24h-3-1	97.0493		adult-3-1	71.2475
individual-3	hair-2	0h-3-2	125.901		4h-3-2	143.216		8h-3-2	122.713		12h-3-2	118.016		16h-3-2	124.721		20h-3-2	107.813		24h-3-2	101.959		adult-3-2	105.942
individual-3	hair-3	0h-3-3	153.695		4h-3-3	133.477		8h-3-3	113.914		12h-3-3	130.3		16h-3-3	95.9354		20h-3-3	105.231		24h-3-3	95.1553		adult-3-3	60.8491
individual-3	hair-4	0h-3-4	143.506		4h-3-4	134.64		8h-3-4	123.127		12h-3-4	118.358		16h-3-4	115.438					24h-3-4	91.8449		adult-3-4	72.4533
individual-3	hair-5				4h-3-5	136.45		8h-3-5	134.32					16h-3-5	118.863					24h-3-5	85.6334		adult-3-5	72.8388
		mean individual grey value	138.316			140.025			124.075			121.702			110.863			104.301			94.3284			76.6661
		summary of mean individual grey value
		time after eclsion	0	4	8	12	16	20	24	adult
		Rep1	146.343	111.392	119.749	93.7842	90.0422	64.1881	53.9538	41.6377
		rep2	155.08	149.983	127.108	123.343	114.409	98.9721	92.4678	72.2651
		rep3	138.316	140.025	124.075	121.702	110.863	104.301	94.3284	76.6661
		darkness of individual =255-gray value	0	4	8	12	16	20	24	adult		mean darkness of adult hair
		Rep1	108.657	143.608	135.251	161.216	164.958	190.812	201.046	213.362
		rep2	99.9197	105.017	127.892	131.657	140.591	156.028	162.532	182.735
		rep3	116.684	114.975	130.925	133.298	144.137	150.699	160.672	178.334		191.477
		percentage darkness of individual pupa or callow=(darkness of individual of pupa or callow/ mean darkness of adult hair) X 100 %	0	4	8	12	16	20	24	adult
		Rep1	0.567466	0.749999	0.706355	0.841959	0.861501	0.996526	1.04998	1.1143
		rep2	0.521836	0.548457	0.667922	0.687587	0.734247	0.814864	0.848834	0.954344
		rep3	0.609391	0.600463	0.683764	0.696157	0.752762	0.787036	0.839117	0.931359
		mean average percentage of darkness of each time point	0.566231	0.632973	0.686013	0.741901	0.782837	0.866142	0.912642	1
		SD	0.0437902	0.10463	0.0193152	0.0867584	0.0687518	0.11377	0.119033	0.099649
		SE	0.0252823	0.0604083	0.0111516	0.05009	0.0396939	0.0656852	0.068724	0.0575324
		Data used for figure
		HAE	mean average percentage of darkness of each time point	SE
		0h	0.566231	0.0252823
		4h	0.632973	0.0604083
		8h	0.686013	0.0111516
		12h	0.741901	0.05009
		16h	0.782837	0.0396939
		20h	0.866142	0.0656852
		24h	0.912642	0.068724

## Sheet: Yellow Pigment Data
Yellow Pigment Data
	0 Hour 1	0 Hour 2	0 Hour 3	0 Hour 4	0 Hour Average		12 Hour 1	12 Hour 2	12 Hour 3	12 Hour 4	12 Hour Average		16 Hour 1	16 Hour 2	16 Hour Average		20 Hour 1	20 Hour 2	20 Hour 3	20 Hour 4	20 Hour Average		24 Hour 1	24 Hour 2	24 Hour 3	24 Hour 4	24 Hour Average		28 Hour 1	28 Hour 2	28 Hour 3	28 Hour 4	28 Hour Average		32 Hour 1	32 Hour 2	32 Hour 3	32 Hour 4	32 Hour Average		48 Hour 1	48 Hour 2	48 Hour 3	48 Hour 4	48 Hour Average		72 Hour 1	72 Hour 2	72 Hour Average
Centimeters	0	0	0.2	0	0.05		0	0.05	0	0.1	0.0375		1.7	0.6	1.15		3	3	1	1.4	2.46667		3.1	3	4.8	1.7	3.15		4.2	3.2	5.2	4.9	4.375		7.4	7.2	6.8	3.4	6.2		3.5	3.7	7.6	6.8	5.4		6.7	5.3	6
Absorbance	0	0	0.02	0	0.005		0	0.005	0	0.01	0.00375		0.17	0.06	0.115		0.3	0.3	0.1	0.14	0.246667		0.31	0.3	0.48	0.17	0.315		0.42	0.32	0.52	0.49	0.4375		0.74	1.25	0.68	0.34	0.7525		0.35	0.37	1.48	0.68	0.72		0.67	0.53	0.6
STDEV Absorbance Corrected For Size	0.01						0.00501772						0.056436				0.101776						0.127148						0.0888351						0.329887						0.499967						0.111853
Cell Length		2.1								1.9				2.1					1.9	1.9																2	1.7	1.5					2.1	1.6			1.7	1.8
Corrected Absorbance		0								0.010526				0.05714					0.1052	0.1473																1.25	0.8	0.4524					1.41	0.85			0.788	0.589
Corrected Average					0.005						0.0038815				0.11357						0.213125						0.315						0.4375						0.8106						0.745				0.6885
Note: Measured in both centimeters and difference in mm absorbance between trough and peak
Note: Values taken by mearuing the vertical distance from the third peak (~390nm) to the left-bound trough of the same peak
Note: Data points "48 Hour 3" and "32 Hour 2" the scale was adjusted up, therefore the centimeter value for those points are lower than they would otherwise be
Note: Values in red have been declared outliars and are excluded from analysis
			Corrected Averages:
Absorbance	Average		STDEV Absorbance			Absorbance	Average
0 Hour	0.005		0 Hour	0.01	0	0 Hour	0.005
12 Hour	0.00375		12 Hour	0.00501772	12	12 Hour	0.0038815
16 Hour	0.115		16 Hour	0.056436	16	16 Hour	0.11357
20 Hour	0.246667		20 Hour	0.0961866	20	20 Hour	0.244467
24 Hour	0.315		24 Hour	0.127148	24	24 Hour	0.315
28 Hour	0.4375		28 Hour	0.0888351	28	28 Hour	0.4375
32 Hour	0.7525		32 Hour	0.329887	32	32 Hour	0.8106
48 Hour	0.72		48 Hour	0.499967	48	48 Hour	0.745
72 Hour	0.6		72 Hour	0.111853	72	72 Hour	0.6885
